# Supplementary material for: Cobalt ferrite nanoparticles for annulation of C3-substituted nitroarenes and aryl isothiocyanates
Source: Royal Society of Chemistry journal article supplement (doi:10.1039/d4ob00789a), 2024-01-01

## *Supporting Information*

### *1. Materials and instrumentation*

Chemicals were commercially available and used as received. Analytical thin-layer chromatography (TLC) was carried out on silica gel 60 F254 (Merck) and visualized under UV irradiation (a wavelength of 254 nm). Column chromatography was performed on silica gel (230–400 mesh or 37–63  $\mu\text{m}$ ). Analyses of gas chromatography (GC) were obtained from a Shimadzu GC 2010-Plus equipped with a flame ionization detector (FID) and an SPB-5 column. Runs of gas chromatography - mass spectrometry (GC-MS) were carried out on a Shimadzu GCMS-QP2010Ultra with a ZB-5MS column. The results of NMR were recorded on Bruker AV 500 and 600 spectrometers using the residual solvent peak as a reference. Chemical shifts were provided in parts per million (ppm). The abbreviations used to explain multiplicities are as follows: s = singlet, d = doublet, t = triplet, q = quartet, dd = doublet of doublets, bs = broad singlet, and m = multiplet. Coupling constants were reported in Hertz (Hz). High resolution mass spectrometry (HR-MS) spectra were recorded on an Agilent HPLC 1200 Series coupled to a Bruker micrOTOF-QII. Mass spectrometry was performed in the positive electrospray ionization (ESI+) mode.

### *2. Optimization of reaction conditions*

#### *2.1. General procedure for screening process*

A mixture of a *N,N*-dimethyl-3-nitroaniline (**1a**), phenyl isothiocyanate (**2a**), catalyst, base and solvent (if necessary) was added to a dried 4 mL vial equipped with a magnetic stir bar. The mixture was placed into a bath preheated to 140 °C and stirred for 16 h under argon. After the reaction was completed, the mixture was left to cool to room temperature. Diphenyl ether was then added to the resulting mixture as an internal standard. An aliquot of the resulting mixture was added to a test tube containing brine (2 mL) then extracted with ethyl acetate (3 x 2 mL). The combined organic components were dried over anhydrous  $\text{Na}_2\text{SO}_4$  and filtered. The resulting solution was analyzed by GC to determine the GC yield of product **3aa** using diphenyl ether as internal standard.

## 2.2. Screening reaction conditions

### 2.2.1. Catalysts

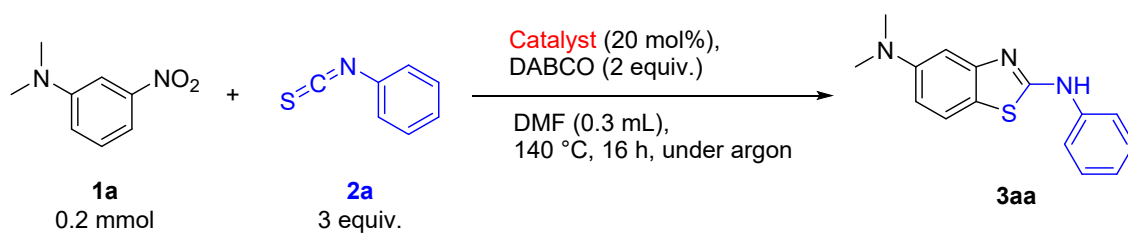

| Entry    | catalyst (20 mol%)                   | yield of <b>3aa</b> (%) <sup>a</sup> |
|----------|--------------------------------------|--------------------------------------|
| 1        | CuI                                  | 6                                    |
| 2        | Cu(OAc) <sub>2</sub>                 | 16                                   |
| 3        | FeSO <sub>4</sub> ·7H <sub>2</sub> O | 39                                   |
| 4        | FeCl <sub>3</sub>                    | 29                                   |
| 5        | Fe <sub>3</sub> O <sub>4</sub>       | 66                                   |
| <b>6</b> | <b>CoFe<sub>2</sub>O<sub>4</sub></b> | <b>76</b>                            |

<sup>a</sup>Reaction conditions: *N,N*-dimethyl-3-nitroaniline (0.2 mmol), PhNCS (0.6 mmol), catalyst (20 mol%), DABCO (0.4 mmol), DMF (0.3 mL), 16 h, 140 °C, under argon. Yields are GC yields.

### 2.2.2. Catalyst loading

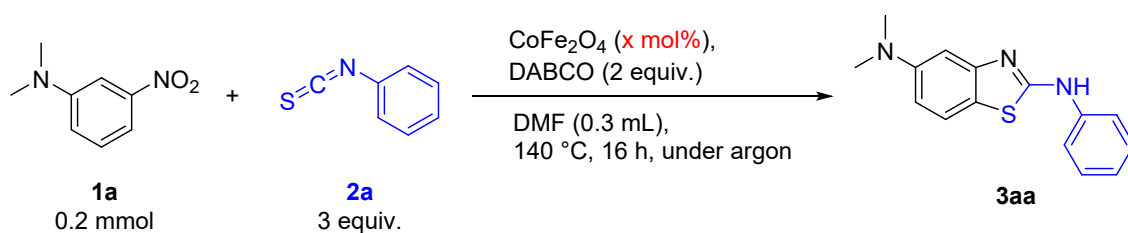

| Entry    | CoFe <sub>2</sub> O <sub>4</sub> (mol%) | yield of <b>3aa</b> (%) <sup>a</sup> |
|----------|-----------------------------------------|--------------------------------------|
| 1        | 0                                       | 15                                   |
| 2        | 5                                       | 58                                   |
| <b>3</b> | <b>10</b>                               | <b>73</b>                            |
| 4        | 20                                      | 76                                   |

<sup>a</sup>Reaction conditions: *N,N*-dimethyl-3-nitroaniline (0.2 mmol), PhNCS (0.6 mmol), CoFe<sub>2</sub>O<sub>4</sub> (x mol%), DABCO (0.4 mmol), DMF (0.3 mL), 16 h, 140 °C, under argon. Yields are GC yields.

### 2.2.3. Molar ratio of reactants

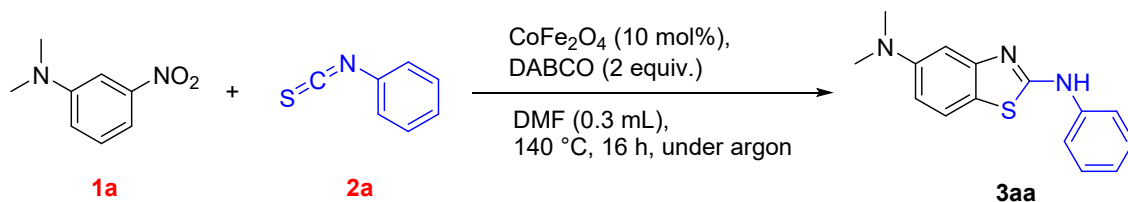

| Entry    | <b>1a</b> : <b>2a</b> | yield of <b>3aa</b> (%) <sup>a</sup> |
|----------|-----------------------|--------------------------------------|
| 1        | 2 : 1                 | 26                                   |
| 2        | 1 : 1                 | 25                                   |
| 3        | 1 : 2                 | 57                                   |
| <b>4</b> | <b>1 : 3</b>          | <b>73</b>                            |
| 5        | 1 : 4                 | 73                                   |

<sup>a</sup>Reaction conditions: limiting reactant (0.2 mmol), CoFe<sub>2</sub>O<sub>4</sub> (10 mol%), DABCO (0.4 mmol), DMF (0.3 mL), 16 h, 140 °C, under argon. Yields are GC yields.

### 2.2.4. Temperature

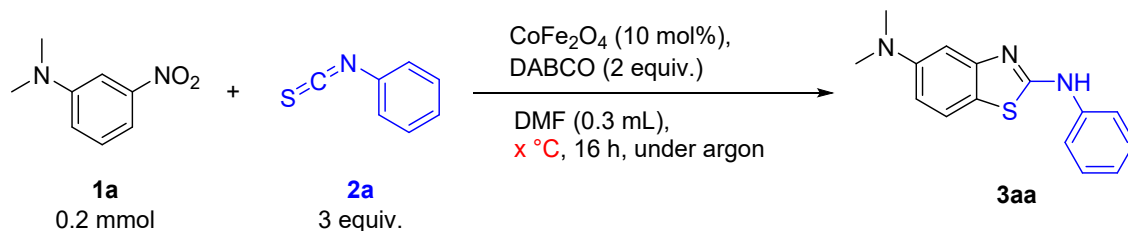

| Entry    | temperature (°C) | yield of <b>3aa</b> (%) <sup>a</sup> |
|----------|------------------|--------------------------------------|
| 1        | 100              | 12                                   |
| 2        | 120              | 48                                   |
| <b>3</b> | <b>130</b>       | <b>75</b>                            |
| 4        | 140              | 73                                   |

<sup>a</sup>Reaction conditions: *N,N*-dimethyl-3-nitroaniline (0.2 mmol), PhNCS (0.6 mmol), CoFe<sub>2</sub>O<sub>4</sub> (10 mol%), DABCO (0.4 mmol), DMF (0.3 mL), 16 h, under argon. Yields are GC yields.

### 2.2.5. Bases

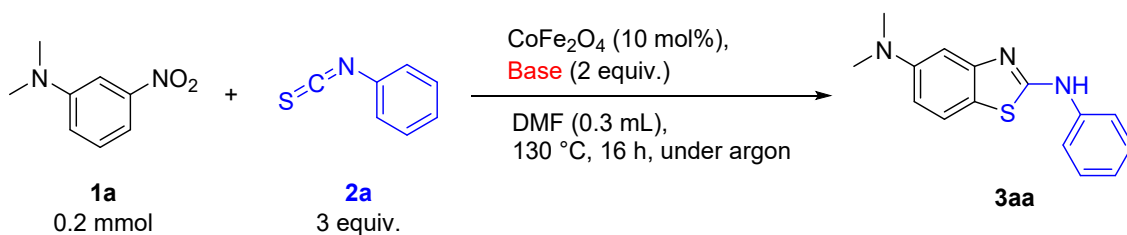

| Entry     | Base                            | yield of <b>3aa</b> (%) <sup>a</sup> |
|-----------|---------------------------------|--------------------------------------|
| 1         | None                            | 7                                    |
| 2         | K <sub>2</sub> CO <sub>3</sub>  | 5                                    |
| 3         | Cs <sub>2</sub> CO <sub>3</sub> | trace                                |
| 4         | NaOH                            | 61                                   |
| 5         | KOH                             | 20                                   |
| 6         | <i>t</i> -BuOK                  | 5                                    |
| 7         | NaOAc                           | 8                                    |
| 8         | 4-DMAP                          | 27                                   |
| 9         | <i>N,N'</i> -dimethylpiperazine | 64                                   |
| 10        | DIPEA                           | 41                                   |
| <b>11</b> | <b>DABCO</b>                    | <b>75</b>                            |
| 12        | DBU                             | 25                                   |
| 13        | <i>N</i> -methylpiperidine      | 29                                   |
| 14        | <i>N</i> -morpholine            | 15                                   |

<sup>a</sup>Reaction conditions: *N,N*-dimethyl-3-nitroaniline (0.2 mmol), PhNCS (0.6 mmol), CoFe<sub>2</sub>O<sub>4</sub> (10 mol%), base (0.4 mmol), DMF (0.3 mL), 130 °C, 16 h, under argon. Yields are GC yields.

### 2.2.6. Base amount

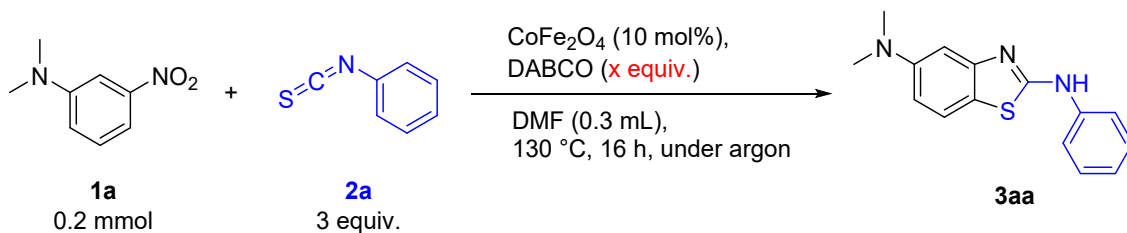

| Entry | base amount (equiv.) | yield of <b>3aa</b> (%) <sup>a</sup> |
|-------|----------------------|--------------------------------------|
| 1     | 0                    | 7                                    |
| 2     | 1                    | 63                                   |
| 3     | 2                    | <b>75</b>                            |
| 4     | 3                    | 75                                   |

<sup>a</sup>Reaction conditions: *N,N*-dimethyl-3-nitroaniline (0.2 mmol), PhNCS (0.6 mmol),  $\text{CoFe}_2\text{O}_4$  (10 mol%), DABCO, DMF (0.3 mL), 130 °C, 16 h, under argon. Yields are GC yields.

### 2.2.7. Solvents

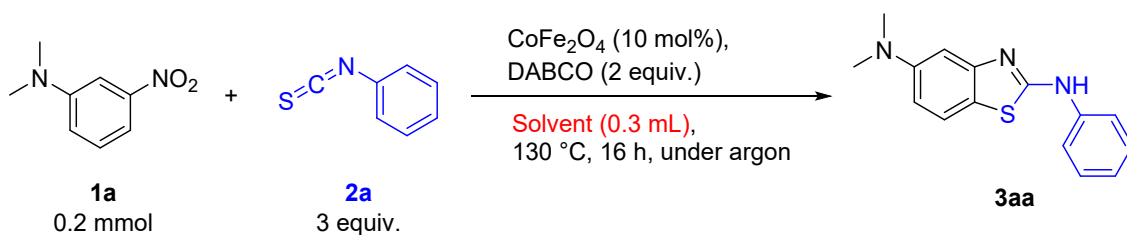

| Entry | solvent                        | yield of <b>3aa</b> (%) <sup>a</sup> |
|-------|--------------------------------|--------------------------------------|
| 1     | DMSO                           | 14                                   |
| 2     | <i>N</i> -Methyl-2-pyrrolidone | 58                                   |
| 3     | <b>DMF</b>                     | <b>75</b>                            |
| 4     | chlorobenzene                  | 44                                   |

<sup>a</sup>Reaction conditions: *N,N*-dimethyl-3-nitroaniline (0.2 mmol), PhNCS (0.6 mmol),  $\text{CoFe}_2\text{O}_4$  (10 mol%), DABCO (0.4 mmol), solvent (0.3 mL), 130 °C, 16 h, under argon. Yields are GC yields.

### 2.2.8. Reaction time

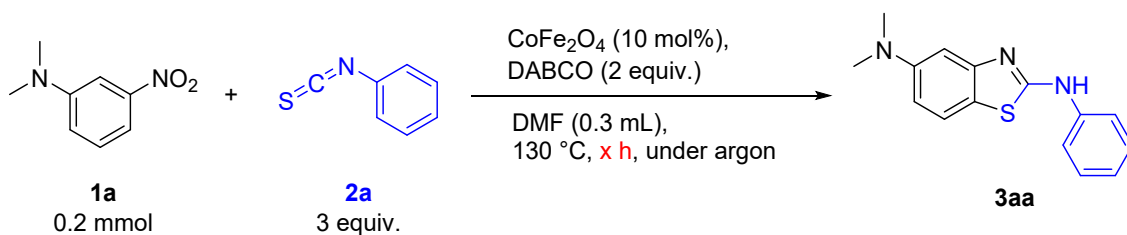

| Entry    | time (h)  | yield of <b>3aa</b> (%) <sup>a</sup> |
|----------|-----------|--------------------------------------|
| 1        | 4         | 45                                   |
| 2        | 8         | 51                                   |
| 3        | 12        | 59                                   |
| 4        | 16        | 75                                   |
| <b>5</b> | <b>24</b> | <b>80</b>                            |
| 6        | 48        | 79                                   |

<sup>a</sup>Reaction conditions: *N,N*-dimethyl-3-nitroaniline (0.2 mmol), PhNCS (0.6 mmol),  $\text{CoFe}_2\text{O}_4$  (10 mol%), DABCO (0.4 mmol), DMF (0.3 mL),  $130\text{ }^\circ\text{C}$ , under argon. Yields are GC yields.

### 3. Studying of reusability

The reaction was carried out at  $130\text{ }^\circ\text{C}$  under argon for 24 h, utilizing DABCO (2 equiv.) with DMF (0.3 mL), in the presence of 10 mol% catalyst  $\text{CoFe}_2\text{O}_4$ . After each run, the reaction vial was placed on a neodymium magnet for 15 min and the solution was removed. The residual solid was washed carefully with copious amounts of solvents including hexanes, ethyl acetate and ethanol. The ensuing solid was dried at  $200\text{ }^\circ\text{C}$  under vacuum for 12 h and reused in subsequent runs.

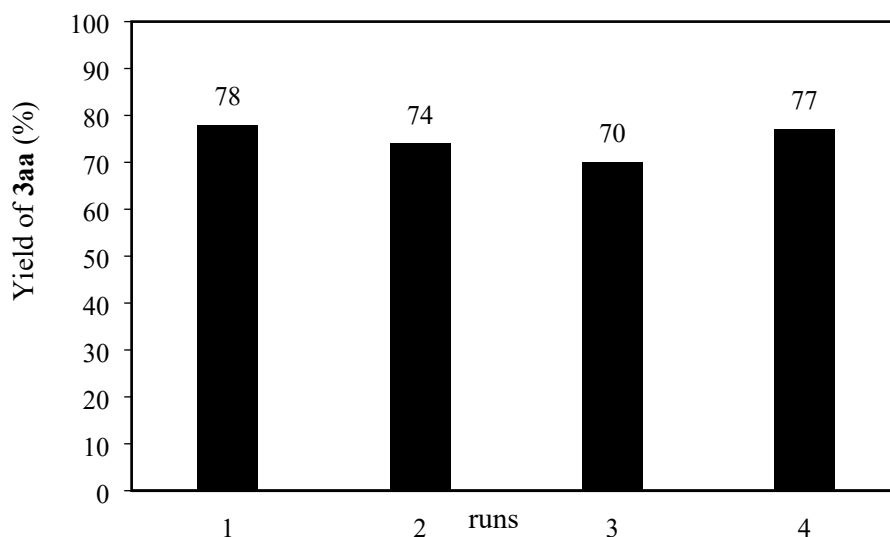

Figure S1. Reusability of the cobalt ferrite catalyst.

#### 4. Synthesis of 2-aminobenzothiazoles

##### 4.1. General procedure

A mixture of a *N,N*-dialkyl-3-nitroanilines derivative (0.2 mmol), an aryl isothiocyanate (0.6 mmol), DABCO (0.4 mmol, 44.8 mg),  $\text{CoFe}_2\text{O}_4$  (10 mol%, 4.7 mg) and DMF (0.3 mL) was added to a dried 4 mL vial equipped with a magnetic stir bar. The mixture was placed into a bath preheated to 130 °C and stirred for 24 h under argon. The crude reaction mixture was diluted with ethyl acetate (30 mL), filtered and then washed with brine (4 × 10 mL). The combined organic phases were dried over anhydrous  $\text{Na}_2\text{SO}_4$ , filtered, and concentrated. Purification by column chromatography yielded the desired product.

For a 1 mmol run of **3aa**: to a dried 8 mL vial equipped with a magnetic stir bar were added *N,N*-dimethyl-3-nitroaniline **1a** (1 mmol, 166.9 mg), phenyl isothiocyanate **2a** (3 mmol, 410 mg), DABCO (2 mmol, 226.5 mg), and  $\text{CoFe}_2\text{O}_4$  (0.1 mmol, 24 mg) and DMF (1 mL). The vial was then placed in a bath preheated to 130 °C and stirred for 24 h under argon. The crude reaction mixture was diluted with ethyl acetate (80 mL), filtered and then washed with brine (4 × 30 mL). The combined organic phases were dried over anhydrous  $\text{Na}_2\text{SO}_4$ , filtered, and concentrated. Purification by column chromatography (toluene/dichloromethane 1:1) yielded **3aa** (226.9 mg, 84% yield) as a yellow solid.

#### 4.2. Characterization of all products

##### ***N*<sup>5</sup>,*N*<sup>5</sup>-Dimethyl-*N*<sup>2</sup>-phenylbenzo[*d*]thiazole-2,5-diamine (3aa)**

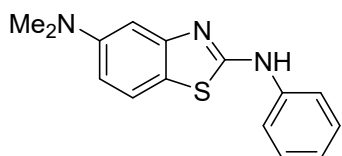

Following the general procedure, in which *N,N*-dimethyl-3-nitroaniline **1a** (0.2 mmol, 33.4 mg), phenyl isothiocyanate **2a** (0.6 mmol, 84.2 mg), CoFe<sub>2</sub>O<sub>4</sub> (0.02 mmol, 4.9 mg), DABCO (0.4 mmol, 45.3 mg), and DMF (0.3 mL) were used. After column chromatography (toluene/dichloromethane 1:1), 46.9 mg (87% yield) of **3aa** was obtained as a yellow solid. *R*<sub>f</sub> = 0.34 (hexanes/ethyl acetate 4:1), mp 159 – 161 °C. <sup>1</sup>H NMR (600 MHz, CDCl<sub>3</sub>) δ 9.10 (s, 1H), 7.51 (d, *J* = 7.7 Hz, 2H), 7.43 (d, *J* = 8.7 Hz, 1H), 7.39 (t, *J* = 7.9 Hz, 2H), 7.14 (t, *J* = 7.4 Hz, 1H), 6.95 (d, *J* = 2.1 Hz, 1H), 6.66 (dd, *J* = 8.7, 2.2 Hz, 1H), 2.93 (s, 6H). <sup>13</sup>C NMR (125 MHz, CDCl<sub>3</sub>) δ 165.7, 152.9, 150.4, 140.3, 129.6, 124.2, 120.9, 120.5, 117.9, 109.6, 103.7, 41.3. HRMS (ESI) *m/z* calcd for C<sub>15</sub>H<sub>15</sub>N<sub>3</sub>S [M+H]<sup>+</sup>: 270.1059, found: 270.1061.

##### ***N*<sup>5</sup>,*N*<sup>5</sup>-Dimethyl-*N*<sup>2</sup>-(*p*-tolyl)benzo[*d*]thiazole-2,5-diamine (3ab)**

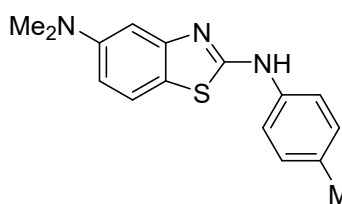

Following the general procedure, in which *N,N*-dimethyl-3-nitroaniline **1a** (0.2 mmol, 33.3 mg), 1-isothiocyanato-4-methylbenzene **2b** (0.6 mmol, 90.4 mg), CoFe<sub>2</sub>O<sub>4</sub> (0.02 mmol, 5.2 mg), DABCO (0.4 mmol, 45.6 mg), and DMF (0.3 mL) were used. After column chromatography (hexanes/toluene/ethyl acetate 1:1:2), 46.0 mg (81% yield) of **3ab** was obtained as a yellow solid. *R*<sub>f</sub> = 0.24 (hexanes/ethyl acetate 2:1), mp 212 – 214 °C. <sup>1</sup>H NMR (600 MHz, DMSO-*d*<sub>6</sub>) δ 10.20 (s, 1H), 7.65 (d, *J* = 8.4 Hz, 2H), 7.51 (d, *J* = 8.7 Hz, 1H), 7.15 (d, *J* = 8.3 Hz, 2H), 6.93 (d, *J* = 2.4 Hz, 1H), 6.63 (dd, *J* = 8.7, 2.5 Hz, 1H), 2.91 (s, 6H), 2.27 (s, 3H). <sup>13</sup>C NMR (150 MHz, DMSO-*d*<sub>6</sub>) δ 162.1, 153.6, 149.9, 138.4, 130.7, 129.3, 120.8, 117.7, 117.2, 109.0, 103.3, 40.7, 20.4. HRMS (ESI) *m/z* calcd for C<sub>16</sub>H<sub>17</sub>N<sub>3</sub>S [M + H]<sup>+</sup>: 284.1216, found: 284.1214.

##### ***N*<sup>2</sup>-(4-Methoxyphenyl)-*N*<sup>5</sup>,*N*<sup>5</sup>-dimethylbenzo[*d*]thiazole-2,5-diamine (3ac)**

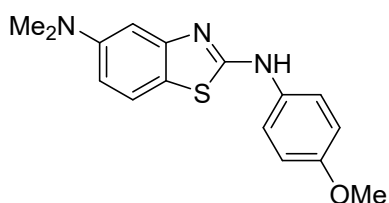

Following the general procedure, in which *N,N*-dimethyl-3-nitroaniline **1a** (0.2 mmol, 33.4 mg), 1-isothiocyanato-4-methoxybenzene **2c** (0.6 mmol, 112.5 mg), CoFe<sub>2</sub>O<sub>4</sub> (0.02 mmol, 4.9 mg), DABCO (0.4 mmol,



44.9 mg), and DMF (0.3 mL) were used. After column chromatography (toluene/dichloromethane/ethyl acetate 1:1:1), 54.0 mg (90% yield) of **3ac** was obtained as an orange solid.  $R_f = 0.34$  (hexanes/ethyl acetate 3:1), mp 215–216 °C.  $^1\text{H NMR}$  (600 MHz, DMSO- $d_6$ )  $\delta$  10.11 (s, 1H), 7.69 – 7.64 (m, 2H), 7.49 (d,  $J = 8.7$  Hz, 1H), 6.96 – 6.91 (m, 2H), 6.90 (d,  $J = 2.4$  Hz, 1H), 6.61 (dd,  $J = 8.7, 2.5$  Hz, 1H), 3.74 (s, 3H), 2.91 (s, 6H).  $^{13}\text{C NMR}$  (150 MHz, DMSO- $d_6$ )  $\delta$  162.5, 154.5, 153.7, 149.8, 134.3, 120.7, 119.4, 117.2, 114.2, 108.8, 103.2, 55.2, 40.7. HRMS (ESI)  $m/z$  calcd for  $\text{C}_{16}\text{H}_{17}\text{N}_3\text{OS}$   $[\text{M}+\text{H}]^+$ : 300.1165, found: 300.1152.

#### ***N*<sup>2</sup>-(4-Bromophenyl)-*N*<sup>5</sup>,*N*<sup>5</sup>-dimethylbenzo[*d*]thiazole-2,5-diamine (3ad)**

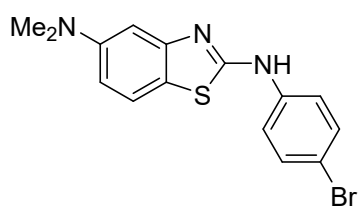

Following the general procedure, in which *N,N*-dimethyl-3-nitroaniline **1a** (0.2 mmol, 33.6 mg), 1-bromo-4-isothiocyanatobenzene **2d** (0.6 mmol, 129.7 mg),  $\text{CoFe}_2\text{O}_4$  (0.02 mmol, 5.0 mg), DABCO (0.4 mmol, 45.8 mg), and DMF (0.3 mL) were used. After column chromatography (toluene/dichloromethane/ethyl acetate 1:1:1), 65.4 mg (94% yield) of **3ad** was obtained as a yellow solid.  $R_f = 0.28$  (hexanes/ethyl acetate 4:1), mp 244 – 246 °C.  $^1\text{H NMR}$  (600 MHz, DMSO- $d_6$ )  $\delta$  10.47 (s, 1H), 7.77 (d,  $J = 8.8$  Hz, 2H), 7.55 (d,  $J = 8.7$  Hz, 1H), 7.52 – 7.50 (m, 2H), 6.95 (d,  $J = 2.3$  Hz, 1H), 6.67 (dd,  $J = 8.7, 2.5$  Hz, 1H), 2.92 (s, 6H).  $^{13}\text{C NMR}$  (150 MHz, DMSO- $d_6$ )  $\delta$  161.7, 153.3, 149.9, 140.1, 131.6, 120.9, 119.4, 117.2, 112.9, 109.4, 103.4, 40.6. HRMS (ESI)  $m/z$  calcd for  $\text{C}_{15}\text{H}_{14}^{79}\text{BrN}_3\text{S}$   $[\text{M}+\text{H}]^+$ : 348.0165, found: 348.0159.

#### ***N*<sup>2</sup>-(2-Fluorophenyl)-*N*<sup>5</sup>,*N*<sup>5</sup>-dimethylbenzo[*d*]thiazole-2,5-diamine (3ae)**

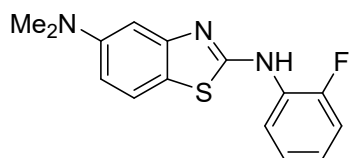

Following the general procedure, in which *N,N*-dimethyl-3-nitroaniline **1a** (0.2 mmol, 33.4 mg), 1-fluoro-2-isothiocyanatobenzene **2e** (0.6 mmol, 92 mg),  $\text{CoFe}_2\text{O}_4$  (0.02 mmol, 4.9 mg), DABCO (0.4 mmol, 46.2 mg), and DMF (0.3 mL) were used. After column chromatography (toluene/hexanes/ethyl acetate 2:2:1), 18.5 mg (32% yield) of **3ae** was obtained as a white solid.  $R_f = 0.29$  (hexanes/ethyl acetate 6:1), mp 188 – 190 °C.  $^1\text{H NMR}$  (600 MHz, DMSO- $d_6$ )  $\delta$  10.13 (s, 1H), 8.53 (s, 1H), 7.54 (d,  $J = 8.7$  Hz, 1H), 7.26 (ddd,  $J = 11.6, 8.1, 1.4$  Hz, 1H), 7.22 (td,  $J = 8.0, 1.1$  Hz, 1H), 7.09 – 7.03 (m, 1H), 6.93 (s, 1H), 6.67 (dd,  $J = 8.7, 2.4$  Hz, 1H), 2.91 (s, 6H).  $^{13}\text{C NMR}$  (125 MHz, DMSO- $d_6$ )  $\delta$  162.5, 152.2 (d,  $J = 244.8$ ), 149.8, 124.5 (d,  $J = 3.1$  Hz), 123.0 (d,  $J = 7.5$

Hz), 121.3, 120.8, 115.2 (d,  $J = 18.9$  Hz), 109.3, 103.3, 40.6. Three carbon signal could not be located.  $^{19}\text{F}$  NMR (471 MHz,  $\text{DMSO-}d_6$ )  $\delta$  -127.18 (s). HRMS (ESI)  $m/z$  calcd for  $\text{C}_{15}\text{H}_{15}\text{FN}_3\text{S}$   $[\text{M}+\text{H}]^+$ : 288.0965, found: 288.0972.

### ***N*<sup>2</sup>-(3-Fluorophenyl)-*N*<sup>5</sup>,*N*<sup>5</sup>-dimethylbenzo[*d*]thiazole-2,5-diamine (3af)**

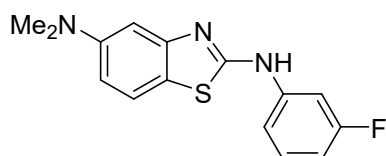

Following the general procedure, in which *N,N*-dimethyl-3-nitroaniline **1a** (0.2 mmol, 33.5 mg), 1-fluoro-3-isothiocyanatobenzene **2f** (0.6 mmol, 92.1 mg),  $\text{CoFe}_2\text{O}_4$  (0.02 mmol, 5.0 mg), DABCO (0.4 mmol, 45.3 mg), and DMF (0.3 mL) were used. After column chromatography (toluene/hexanes/ethyl acetate 1:1:1), 24.2 mg (42% yield) of **3af** was obtained as a pale yellow solid.  $R_f = 0.34$  (hexanes/ethyl acetate 5:1), mp 189 – 191 °C.  $^1\text{H}$  NMR (600 MHz,  $\text{DMSO-}d_6$ )  $\delta$  10.55 (s, 1H), 7.93 – 7.88 (m, 1H), 7.56 (d,  $J = 8.7$  Hz, 1H), 7.42 – 7.37 (m, 1H), 7.36 (td,  $J = 8.0, 6.8$  Hz, 1H), 7.00 (d,  $J = 2.4$  Hz, 1H), 6.83 – 6.77 (m, 1H), 6.68 (dd,  $J = 8.7, 2.5$  Hz, 1H), 2.93 (s, 6H).  $^{13}\text{C}$  NMR (126 MHz,  $\text{DMSO-}d_6$ )  $\delta$  162.5 (d,  $J = 241.4$  Hz), 161.6, 153.3, 149.9, 142.4 (d,  $J = 11.5$  Hz), 130.40 (d,  $J = 9.8$  Hz), 120.9, 117.1, 113.4, 109.5, 107.9 (d,  $J = 21.2$  Hz), 104.3 (d,  $J = 27.0$  Hz), 103.6, 40.6.  $^{19}\text{F}$  NMR (471 MHz,  $\text{DMSO-}d_6$ )  $\delta$  -111.80 (s). HRMS (ESI)  $m/z$  calcd for  $\text{C}_{15}\text{H}_{15}\text{FN}_3\text{S}$   $[\text{M}+\text{H}]^+$ : 288.0965, found: 288.0953.

### ***N*<sup>5</sup>,*N*<sup>5</sup>-Dimethyl-*N*<sup>2</sup>-(4-(trifluoromethyl)phenyl)benzo[*d*]thiazole-2,5-diamine (3ag)**

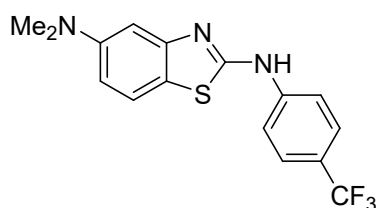

Following the general procedure, in which *N,N*-dimethyl-3-nitroaniline **1a** (0.2 mmol, 33.4 mg), 1-isothiocyanato-4-(trifluoromethyl)benzene **2g** (0.6 mmol, 122.5 mg),  $\text{CoFe}_2\text{O}_4$  (0.02 mmol, 5.0 mg), DABCO (0.4 mmol, 45.2 mg), and DMF (0.3 mL) were used. After column chromatography (toluene/hexanes/ethyl acetate 1:1:1), 39.0 mg (58% yield) of **3ag** was obtained as a yellow solid.  $R_f = 0.29$  (hexanes/ethyl acetate 4:1), mp 226 – 228 °C.  $^1\text{H}$  NMR (600 MHz,  $\text{DMSO-}d_6$ )  $\delta$  10.73 (s, 1H), 7.98 (d,  $J = 8.6$  Hz, 2H), 7.70 (d,  $J = 8.6$  Hz, 2H), 7.59 (d,  $J = 8.7$  Hz, 1H), 6.99 (d,  $J = 2.4$  Hz, 1H), 6.71 (dd,  $J = 8.8, 2.5$  Hz, 1H), 2.93 (s, 6H).  $^{13}\text{C}$  NMR (125 MHz,  $\text{DMSO-}d_6$ )  $\delta$  161.5, 153.1, 149.9, 144.1, 126.2 (q,  $J = 3.4$  Hz), 121.0, 117.3, 117.2, 109.7, 103.5, 40.6.  $^{19}\text{F}$  NMR (471 MHz,  $\text{DMSO-}d_6$ )  $\delta$  -59.88 (s). HRMS (ESI)  $m/z$  calcd for  $\text{C}_{16}\text{H}_{15}\text{F}_3\text{N}_3\text{S}$   $[\text{M}+\text{H}]^+$ : 338.0933, found: 338.0934.

***N*<sup>2</sup>-(3,5-bis(trifluoromethyl)phenyl)-*N*<sup>5</sup>,*N*<sup>5</sup>-dimethylbenzo[*d*]thiazole-2,5-diamine (3ah)**

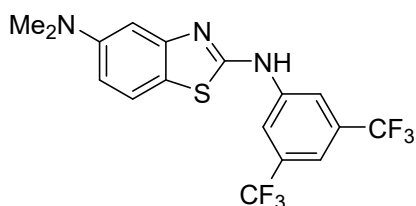

Following the general procedure, in which *N,N*-dimethyl-3-nitroaniline **1a** (0.2 mmol, 33.3 mg), 1-isothiocyanato-3,5-bis(trifluoromethyl)benzene **2h** (0.6 mmol, 162.8 mg), CoFe<sub>2</sub>O<sub>4</sub> (0.02 mmol, 4.9 mg), DABCO (0.4 mmol, 44.9 mg), and DMF (0.3 mL) were used. After column chromatography (hexanes/ethyl acetate 5:1), 65.7 mg (81% yield) of **3ah** was obtained as a yellow solid. *R*<sub>f</sub> = 0.31 (hexanes/ethyl acetate 8:1), mp 146 – 148 °C. <sup>1</sup>H NMR (600 MHz, DMSO-*d*<sub>6</sub>) δ 11.04 (s, 1H), 8.44 (s, 2H), 7.64 (s, 1H), 7.61 (d, *J* = 8.7 Hz, 1H), 6.98 (d, *J* = 2.4 Hz, 1H), 6.73 (dd, *J* = 8.8, 2.5 Hz, 1H), 2.94 (s, 6H). <sup>13</sup>C NMR (125 MHz, DMSO-*d*<sub>6</sub>) δ 161.3, 152.9, 150.0, 142.3, 130.9 (q, *J* = 33.0 Hz), 123.3 (q, *J* = 273.1 Hz), 121.1, 117.1, 116.9 (q, *J* = 3.2 Hz), 114.1 – 113.7 (m), 110.0, 103.6, 40.6. One carbon signal could not be located. <sup>19</sup>F NMR (471 MHz, DMSO-*d*<sub>6</sub>) δ -61.63 (s). HRMS (ESI) *m/z* calcd for C<sub>17</sub>H<sub>14</sub>F<sub>6</sub>N<sub>3</sub>S [M+H]<sup>+</sup>: 406.0807, found: 406.0797.

**5-(Azepan-1-yl)-*N*-phenylbenzo[*d*]thiazol-2-amine (3ba)**

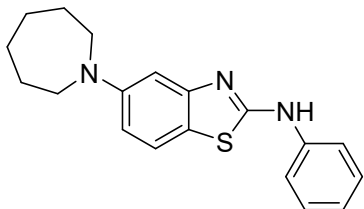

Following the general procedure, in which 1-(3-nitrophenyl)azepane **1b** (0.2 mmol, 44.6 mg), phenyl isothiocyanate **2a** (0.6 mmol, 81.2 mg), CoFe<sub>2</sub>O<sub>4</sub> (0.02 mmol, 4.8 mg), DABCO (0.4 mmol, 44.9 mg) and DMF (0.3 mL) were used. After column chromatography (hexanes/ethyl acetate 4:1) 36.3 mg (56% yield) of **3ba** was obtained as an orange solid. *R*<sub>f</sub> = 0.29 (hexanes/ethyl acetate 6:1), mp 159 – 161 °C. <sup>1</sup>H NMR (600 MHz, DMSO-*d*<sub>6</sub>) δ 10.27 (s, 1H), 7.77 (d, *J* = 7.9 Hz, 2H), 7.47 (d, *J* = 8.7 Hz, 1H), 7.34 (dd, *J* = 8.4, 7.5 Hz, 2H), 6.99 (t, *J* = 7.3 Hz, 1H), 6.88 (d, *J* = 2.3 Hz, 1H), 6.59 (dd, *J* = 8.8, 2.4 Hz, 1H), 3.48 (t, *J* = 6.0 Hz, 4H), 1.75 (s, 4H), 1.49 – 1.44 (m, 4H). <sup>13</sup>C NMR (150 MHz, DMSO-*d*<sub>6</sub>) δ 161.9, 153.9, 147.6, 140.9, 128.9, 121.7, 121.1, 117.6, 115.6, 107.7, 101.8, 49.1, 27.0, 26.5. HRMS (ESI) *m/z* calcd for C<sub>19</sub>H<sub>22</sub>N<sub>3</sub>S [M+H]<sup>+</sup>: 324.1529, found: 324.1517.

***N*<sup>5</sup>-Benzyl-*N*<sup>5</sup>-methyl-*N*<sup>2</sup>-phenylbenzo[*d*]thiazole-2,5-diamine (3ca)**

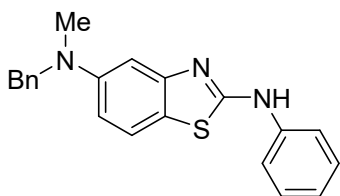

Following the general procedure, in which *N*-benzyl-*N*-methyl-3-nitroaniline **1c** (0.2 mmol, 49.1 mg), phenyl

isothiocyanate **2a** (0.6 mmol, 82.1 mg), CoFe<sub>2</sub>O<sub>4</sub> (0.02 mmol, 4.7 mg), DABCO (0.4 mmol, 44.9 mg), and DMF (0.3 mL) were used. After column chromatography (toluene/dichloromethane 1:1), 51.9 mg (75% yield) of **3ca** was obtained as an orange solid.  $R_f=0.4$  (hexanes/ethyl acetate 5 : 1), mp 176 – 177 °C. <sup>1</sup>H NMR (600 MHz, DMSO-*d*<sub>6</sub>)  $\delta$  10.30 (s, 1H), 7.75 (d,  $J = 7.9$  Hz, 2H), 7.50 (d,  $J = 8.7$  Hz, 1H), 7.34 – 7.29 (m, 4H), 7.23 – 7.20 (m, 3H), 6.98 (t,  $J = 7.3$  Hz, 1H), 6.92 (d,  $J = 2.3$  Hz, 1H), 6.65 (dd,  $J = 8.7, 2.4$  Hz, 1H), 4.61 (s, 2H), 3.05 (s, 3H). <sup>13</sup>C NMR (150 MHz, DMSO-*d*<sub>6</sub>)  $\delta$  162.0, 153.6, 148.5, 140.8, 139.1, 128.9, 128.4, 126.7, 126.6, 121.8, 120.9, 117.6, 117.0, 108.8, 103.0, 55.8, 39.1. HRMS (ESI)  $m/z$  calcd for C<sub>21</sub>H<sub>20</sub>N<sub>3</sub>S [M+H]<sup>+</sup>: 346.1372, found: 346.1374.

### 5-Morpholino-*N*-phenylbenzo[*d*]thiazol-2-amine (**3da**)

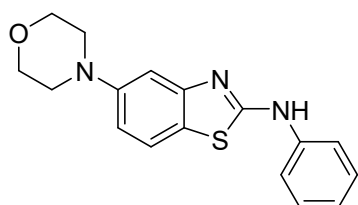

Following the general procedure, in which 4-(3-nitrophenyl)morpholine **1d** (0.2 mmol, 41.8 mg), phenyl isothiocyanate **2a** (0.6 mmol, 81.8 mg), CoFe<sub>2</sub>O<sub>4</sub> (0.02 mmol, 4.9 mg), DABCO (0.4 mmol, 45.4 mg), and DMF (0.3 mL) were used. After column chromatography (toluene/dichloromethane/ethyl acetate 2:2:1), 52.3 mg (84% yield) of **3da** was obtained as a pale yellow solid.  $R_f = 0.36$  (hexanes/ethyl acetate 3:2), mp 205 – 207 °C. <sup>1</sup>H NMR (600 MHz, DMSO-*d*<sub>6</sub>)  $\delta$  10.37 (s, 1H), 7.78 (d,  $J = 7.7$  Hz, 2H), 7.60 (d,  $J = 8.7$  Hz, 1H), 7.37 – 7.32 (m, 2H), 7.16 (d,  $J = 2.3$  Hz, 1H), 7.03 – 6.98 (m, 1H), 6.85 (dd,  $J = 8.7, 2.4$  Hz, 1H), 3.77 – 3.73 (m, 4H), 3.15 – 3.10 (m, 4H). <sup>13</sup>C NMR (125 MHz, DMSO-*d*<sub>6</sub>)  $\delta$  162.1, 153.3, 150.4, 140.7, 128.9, 121.8, 120.9, 120.3, 117.7, 111.7, 106.0, 66.1, 49.2. HRMS (ESI)  $m/z$  calcd for C<sub>17</sub>H<sub>17</sub>N<sub>3</sub>OS [M+H]<sup>+</sup>: 312.1165, found: 312.1173.

### *N*-Phenyl-5-thiomorpholinobenzo[*d*]thiazol-2-amine (**3ea**)

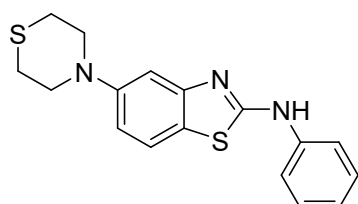

Following the general procedure, in which 4-(3-nitrophenyl)thiomorpholine **1e** (0.2 mmol, 46.0 mg), phenyl isothiocyanate **2a** (0.6 mmol, 82.0 mg), CoFe<sub>2</sub>O<sub>4</sub> (0.02 mmol, 5.2 mg), DABCO (0.4 mmol, 45.3 mg), and DMF (0.3 mL) were used. After column chromatography (hexanes/dichloromethane 1:1), 51.6 mg (79% yield) of **3ea** was obtained as a pale yellow solid.  $R_f = 0.35$  (hexanes/ethyl acetate 6:1), mp 215 – 217 °C. <sup>1</sup>H NMR (600 MHz, DMSO-*d*<sub>6</sub>)  $\delta$  10.36 (s, 1H), 7.78 (d,

$J = 7.8$  Hz, 2H), 7.58 (d,  $J = 8.7$  Hz, 1H), 7.37 – 7.32 (m, 2H), 7.15 (d,  $J = 2.3$  Hz, 1H), 7.03 – 6.98 (m, 1H), 6.82 (dd,  $J = 8.7, 2.4$  Hz, 1H), 3.55 – 3.51 (m, 4H), 2.71 – 2.67 (m, 4H).  $^{13}\text{C}$  NMR (125 MHz, DMSO- $d_6$ )  $\delta$  162.1, 153.5, 150.0, 140.7, 128.9, 121.8, 121.0, 120.0, 117.7, 112.9, 107.2, 51.8, 25.7. HRMS (ESI)  $m/z$  calcd for  $\text{C}_{17}\text{H}_{17}\text{N}_3\text{S}_2$   $[\text{M}+\text{H}]^+$ : 328.0937, found: 328.0943.

### 5-(4-Methylpiperazin-1-yl)-*N*-phenylbenzo[*d*]thiazol-2-amine (3fa)

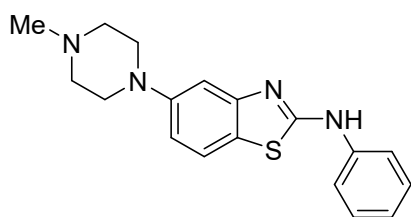

Following the general procedure, in which 1-methyl-4-(3-nitrophenyl)piperazine **1f** (0.2 mmol, 44.3 mg), phenyl isothiocyanate **2a** (0.6 mmol, 82.1 mg),  $\text{CoFe}_2\text{O}_4$  (0.02 mmol, 4.9 mg), DABCO (0.4 mmol, 45.1 mg), and DMF (0.3 mL) were used. After column chromatography (hexane/ethyl acetate 1:1), 38.4 mg (59% yield) of **3fa** was obtained as a purple solid.  $R_f = 0.25$  (toluene/ethyl acetate/methanol 10:10:3), mp 215 – 217 °C.  $^1\text{H}$  NMR (600 MHz, DMSO- $d_6$ )  $\delta$  10.35 (s, 1H), 7.78 (dd,  $J = 8.6, 1.0$  Hz, 2H), 7.57 (d,  $J = 8.7$  Hz, 1H), 7.37 – 7.32 (m, 2H), 7.14 (d,  $J = 2.4$  Hz, 1H), 7.02 – 6.98 (m, 1H), 6.84 (dd,  $J = 8.7, 2.4$  Hz, 1H), 3.17 – 3.13 (m, 4H), 2.49 – 2.45 (m, 4H), 2.23 (s, 3H).  $^{13}\text{C}$  NMR (125 MHz, DMSO- $d_6$ )  $\delta$  162.1, 153.3, 150.3, 140.7, 128.9, 121.8, 120.8, 119.9, 117.6, 112.1, 106.2, 54.6, 48.8, 45.7. HRMS (ESI)  $m/z$  calcd for  $\text{C}_{18}\text{H}_{20}\text{N}_4\text{S}_2$   $[\text{M}+\text{H}]^+$ : 325.1481, found: 325.1493.

### 5-Methoxy-6-methyl-*N*-phenylbenzo[*d*]thiazol-2-amine (3ga)

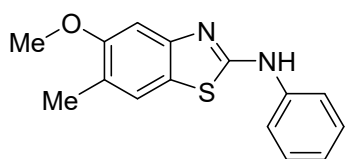

Following the general procedure, in which 2-methoxy-1-methyl-4-nitrobenzene **1g** (0.2 mmol, 33.5 mg), phenyl isothiocyanate **2a** (0.6 mmol, 82.0 mg),  $\text{CoFe}_2\text{O}_4$  (0.02 mmol, 4.8 mg), DABCO (0.4 mmol, 46.9 mg), and DMF (0.3 mL) were used. After column chromatography (toluene/dichloromethane/ethyl acetate 1:1:0.1), 11.1 mg (20% yield) of **3ga** was obtained as a pale yellow solid.  $R_f = 0.28$  (hexanes/ethyl acetate 5:1), mp 199 – 201 °C.  $^1\text{H}$  NMR (600 MHz, DMSO- $d_6$ )  $\delta$  10.34 (s, 1H), 7.78 (d,  $J = 7.7$  Hz, 2H), 7.51 (d,  $J = 0.6$  Hz, 1H), 7.37 – 7.32 (m, 2H), 7.20 (s, 1H), 7.02 – 6.97 (m, 1H), 3.84 (s, 3H), 2.19 (s, 3H).  $^{13}\text{C}$  NMR (150 MHz, DMSO- $d_6$ )  $\delta$  161.8, 156.5, 151.5, 140.8, 128.9, 121.8, 121.5, 121.0, 120.5, 117.6, 101.7, 55.5, 16.2. HRMS (ESI)  $m/z$  calcd for  $\text{C}_{15}\text{H}_{14}\text{N}_2\text{OS}$   $[\text{M}+\text{H}]^+$ : 271.0900, found: 271.0910.

### *N*-phenylthiazolo[4,5-*g*]quinolin-2-amine (3ha)

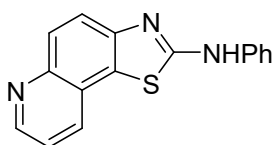

Following the general procedure, in which 6-nitroquinoline **1h** (0.2 mmol, 35.1 mg), phenyl isothiocyanate **2a** (0.6 mmol, 82.0 mg), CoFe<sub>2</sub>O<sub>4</sub> (0.02 mmol, 4.8 mg), DABCO (0.4 mmol, 45.5 mg), and DMF (0.3 mL) were used. After column chromatography (hexane/ethyl acetate/methanol 1:1:0.05), 22.8 mg (41% yield) of **3ha** was obtained as a pale yellow solid. *R<sub>f</sub>* = 0.23 (hexanes/ethyl acetate 2:1), mp 245 – 247 °C. <sup>1</sup>H NMR (600 MHz, DMSO-*d*<sub>6</sub>) δ 10.71 (s, 1H), 8.85 (dd, *J* = 4.2, 1.5 Hz, 1H), 8.34 (d, *J* = 8.1 Hz, 1H), 8.03 (d, *J* = 8.9 Hz, 1H), 7.96 (d, *J* = 8.9 Hz, 1H), 7.82 (d, *J* = 7.8 Hz, 2H), 7.56 (dd, *J* = 8.3, 4.2 Hz, 1H), 7.40 (dd, *J* = 8.2, 7.5 Hz, 2H), 7.05 (t, *J* = 7.3 Hz, 1H). <sup>13</sup>C NMR (125 MHz, DMSO-*d*<sub>6</sub>) δ 162.7, 149.9, 148.4, 144.6, 140.5, 132.2, 129.0, 127.6, 124.1, 122.8, 122.6, 122.2, 121.7, 117.8. HRMS (ESI) *m/z* calcd for C<sub>16</sub>H<sub>12</sub>N<sub>3</sub>S [M+H]<sup>+</sup>: 278.0746, found: 278.0739.

#### 4.3. Copies of NMR spectra of products

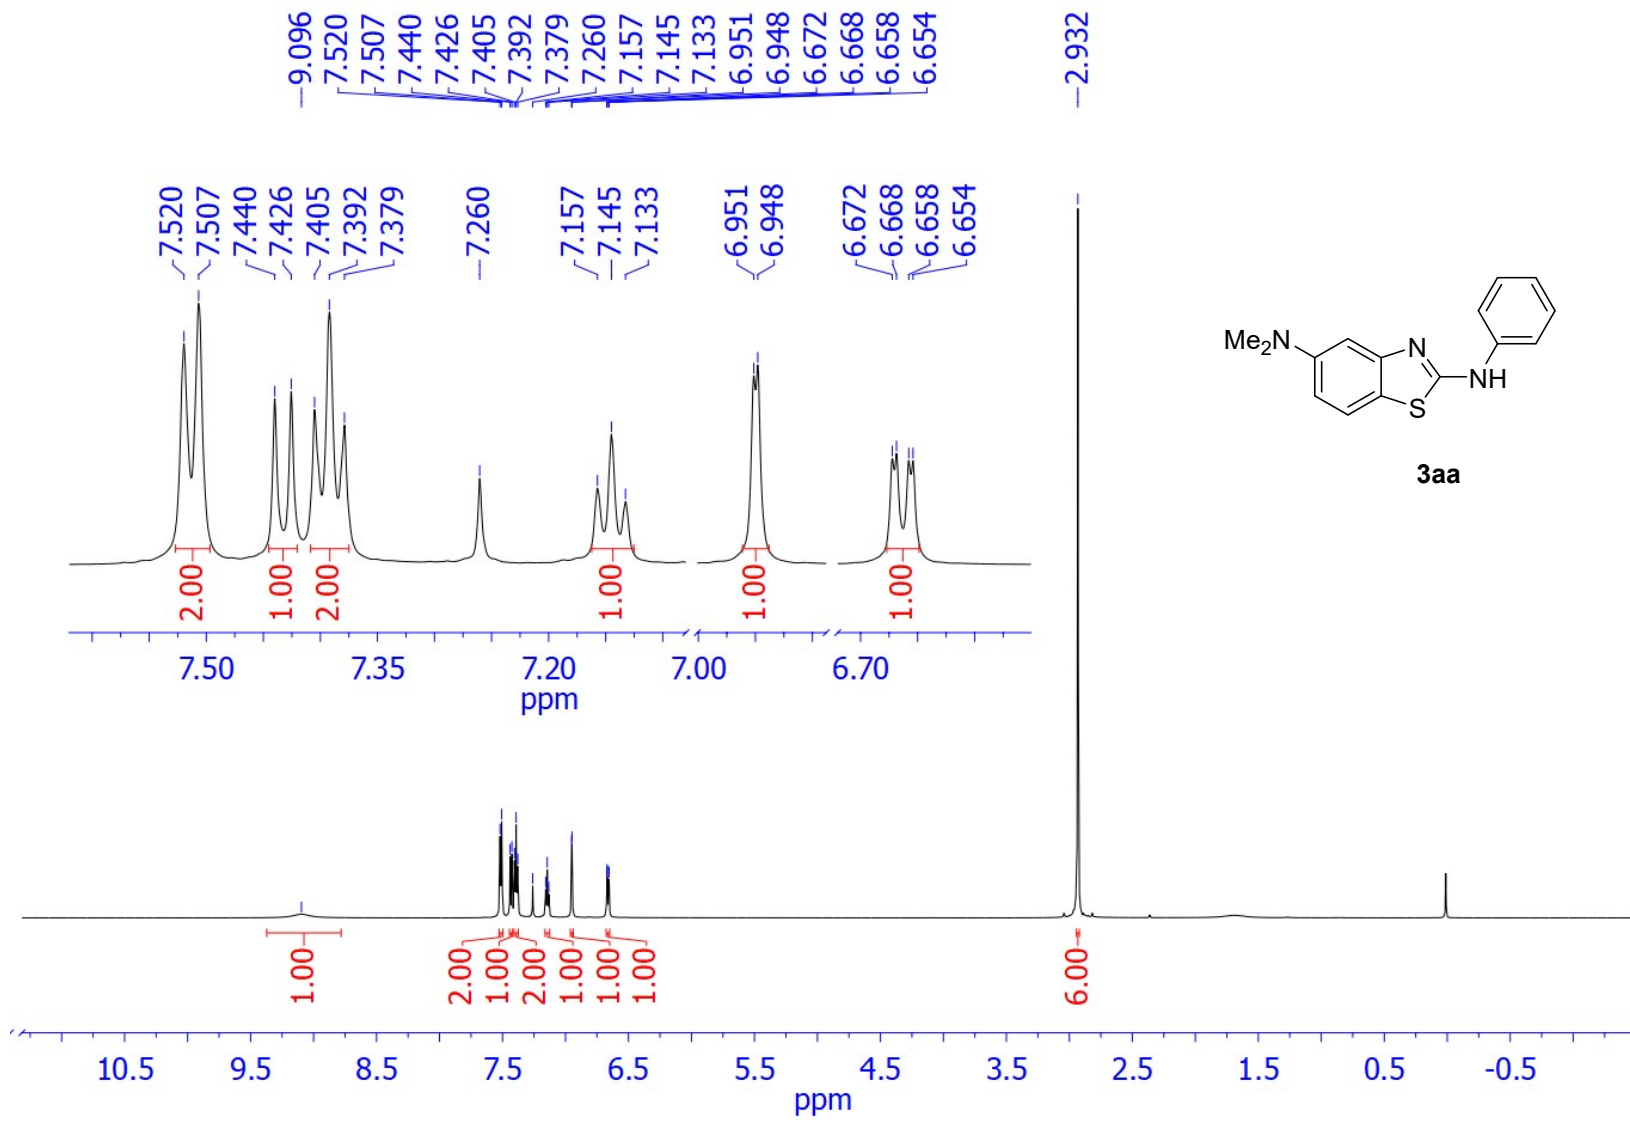

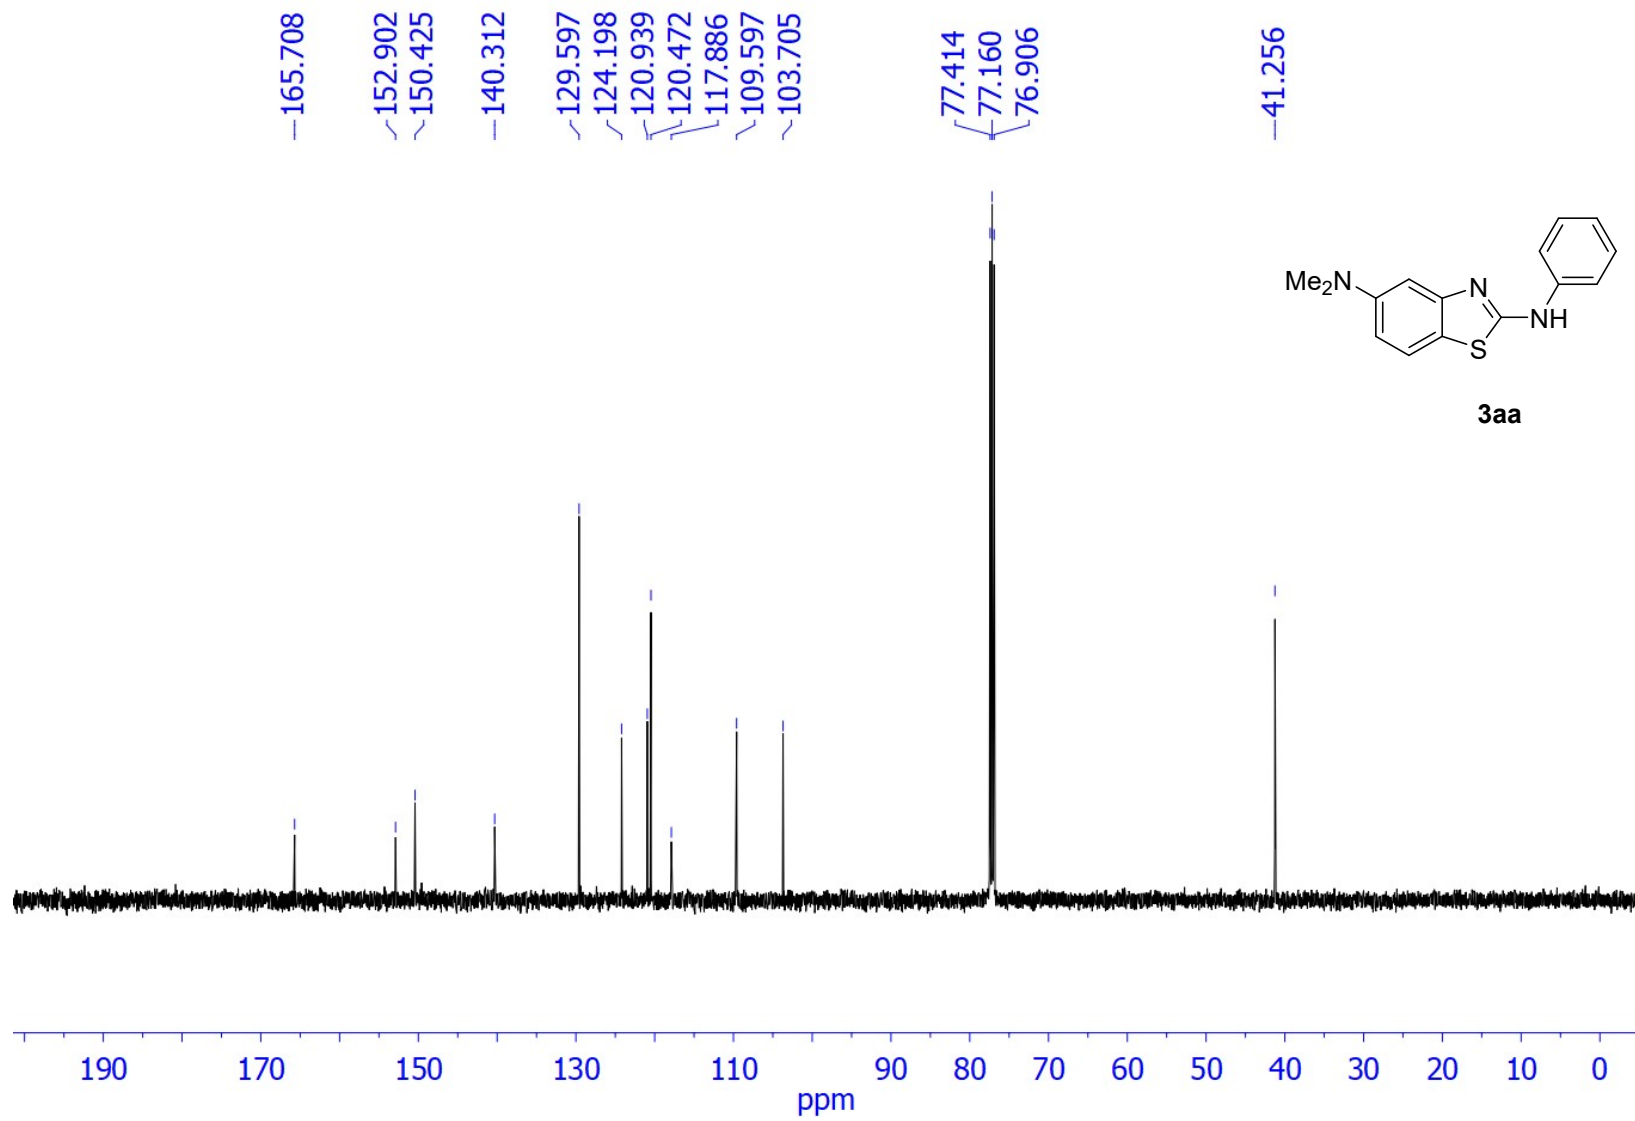



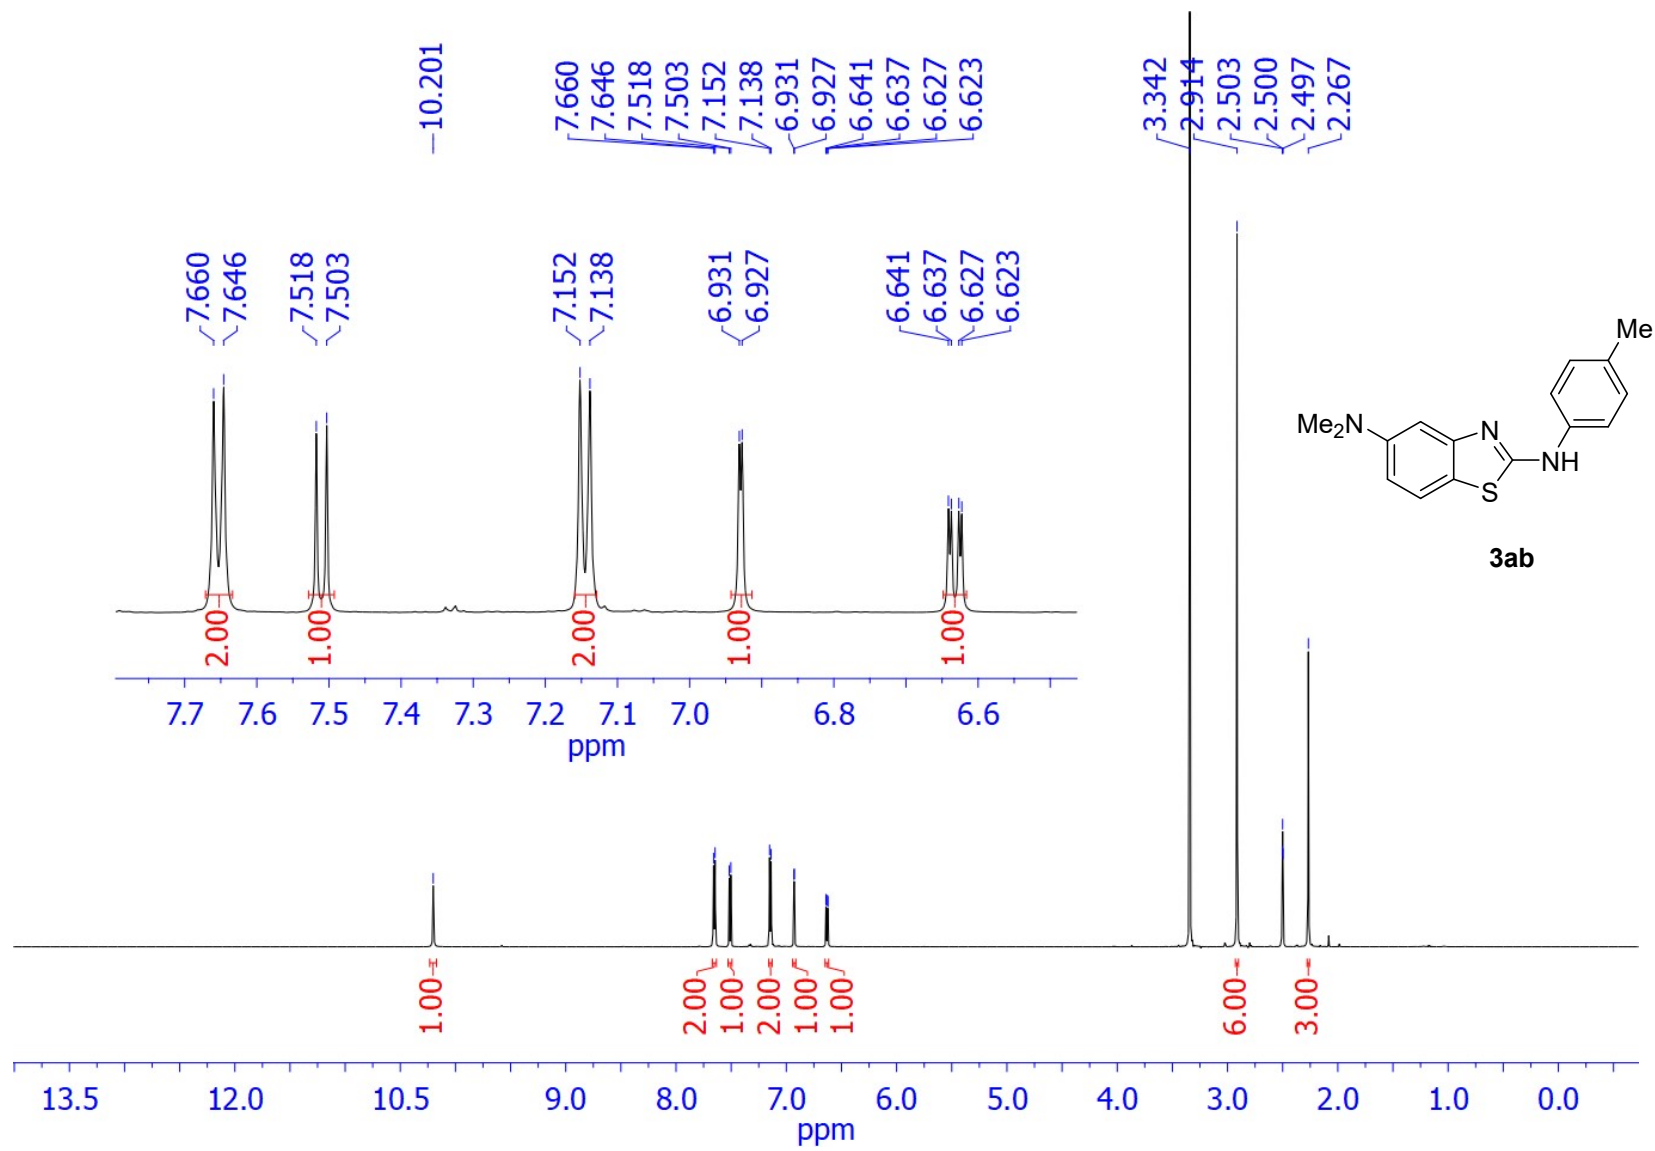

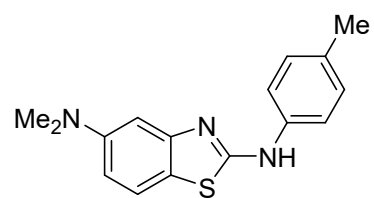

**3ab**

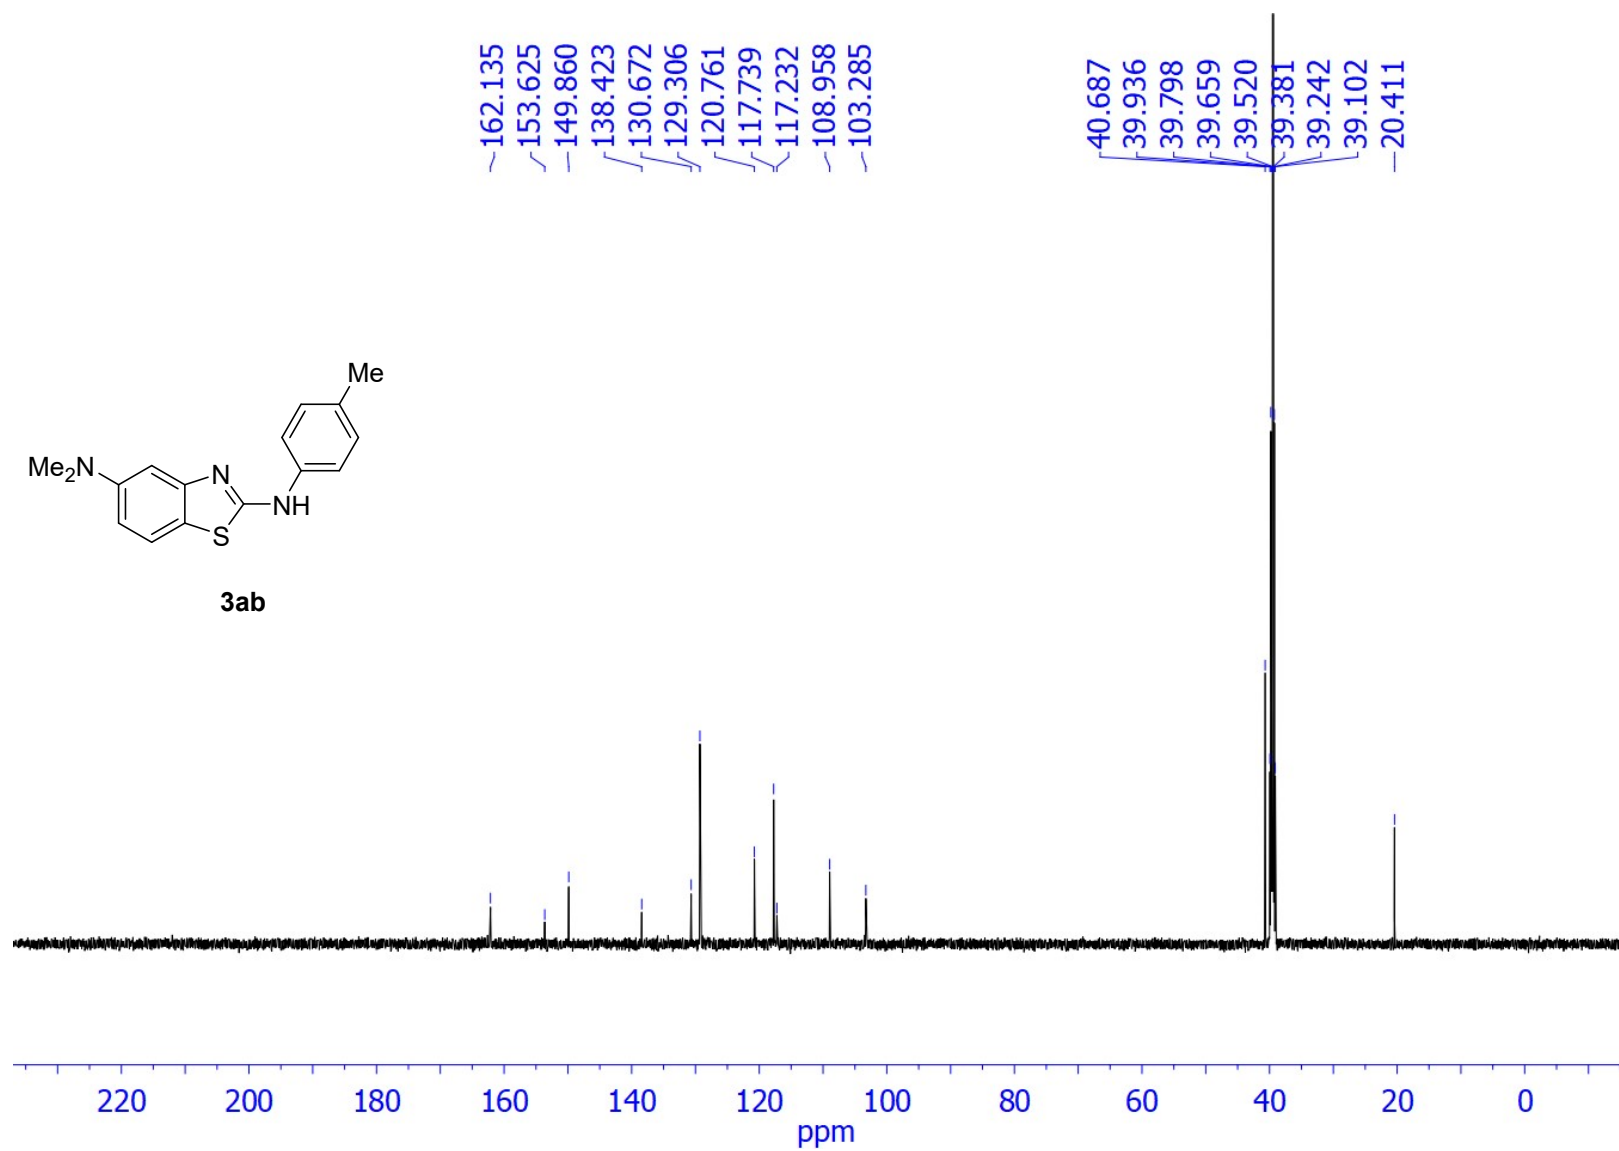

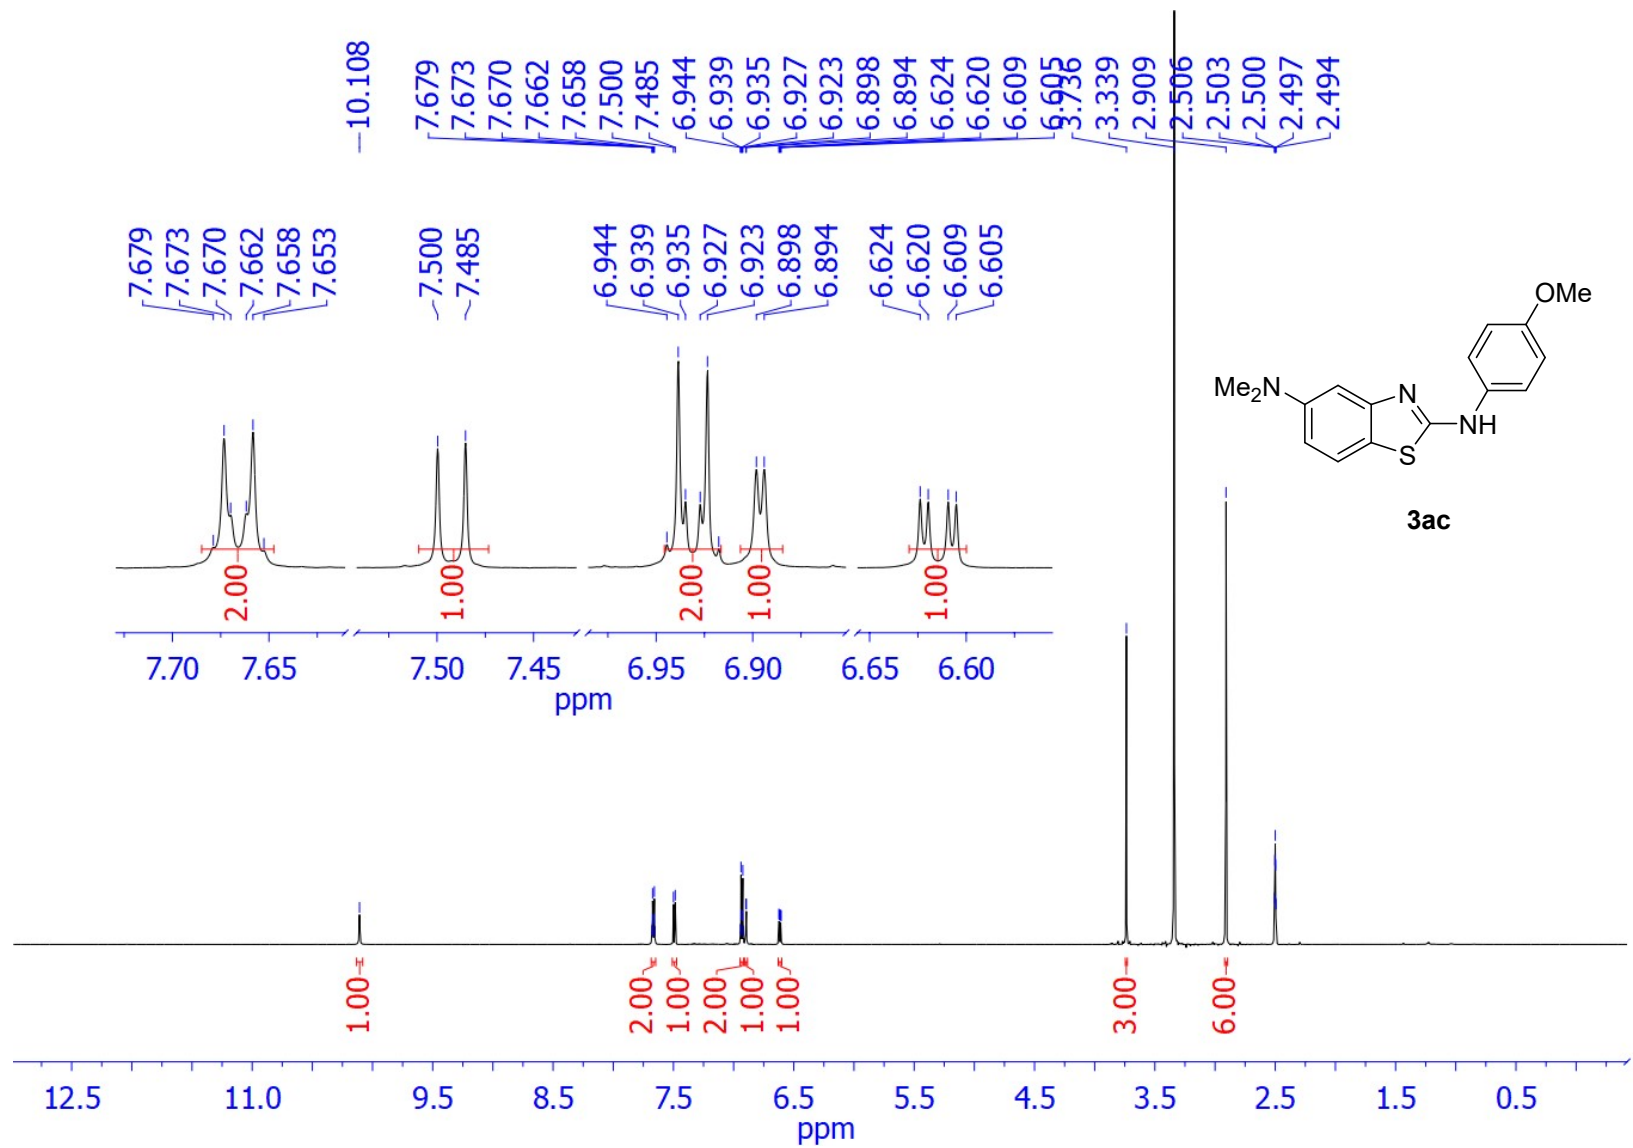

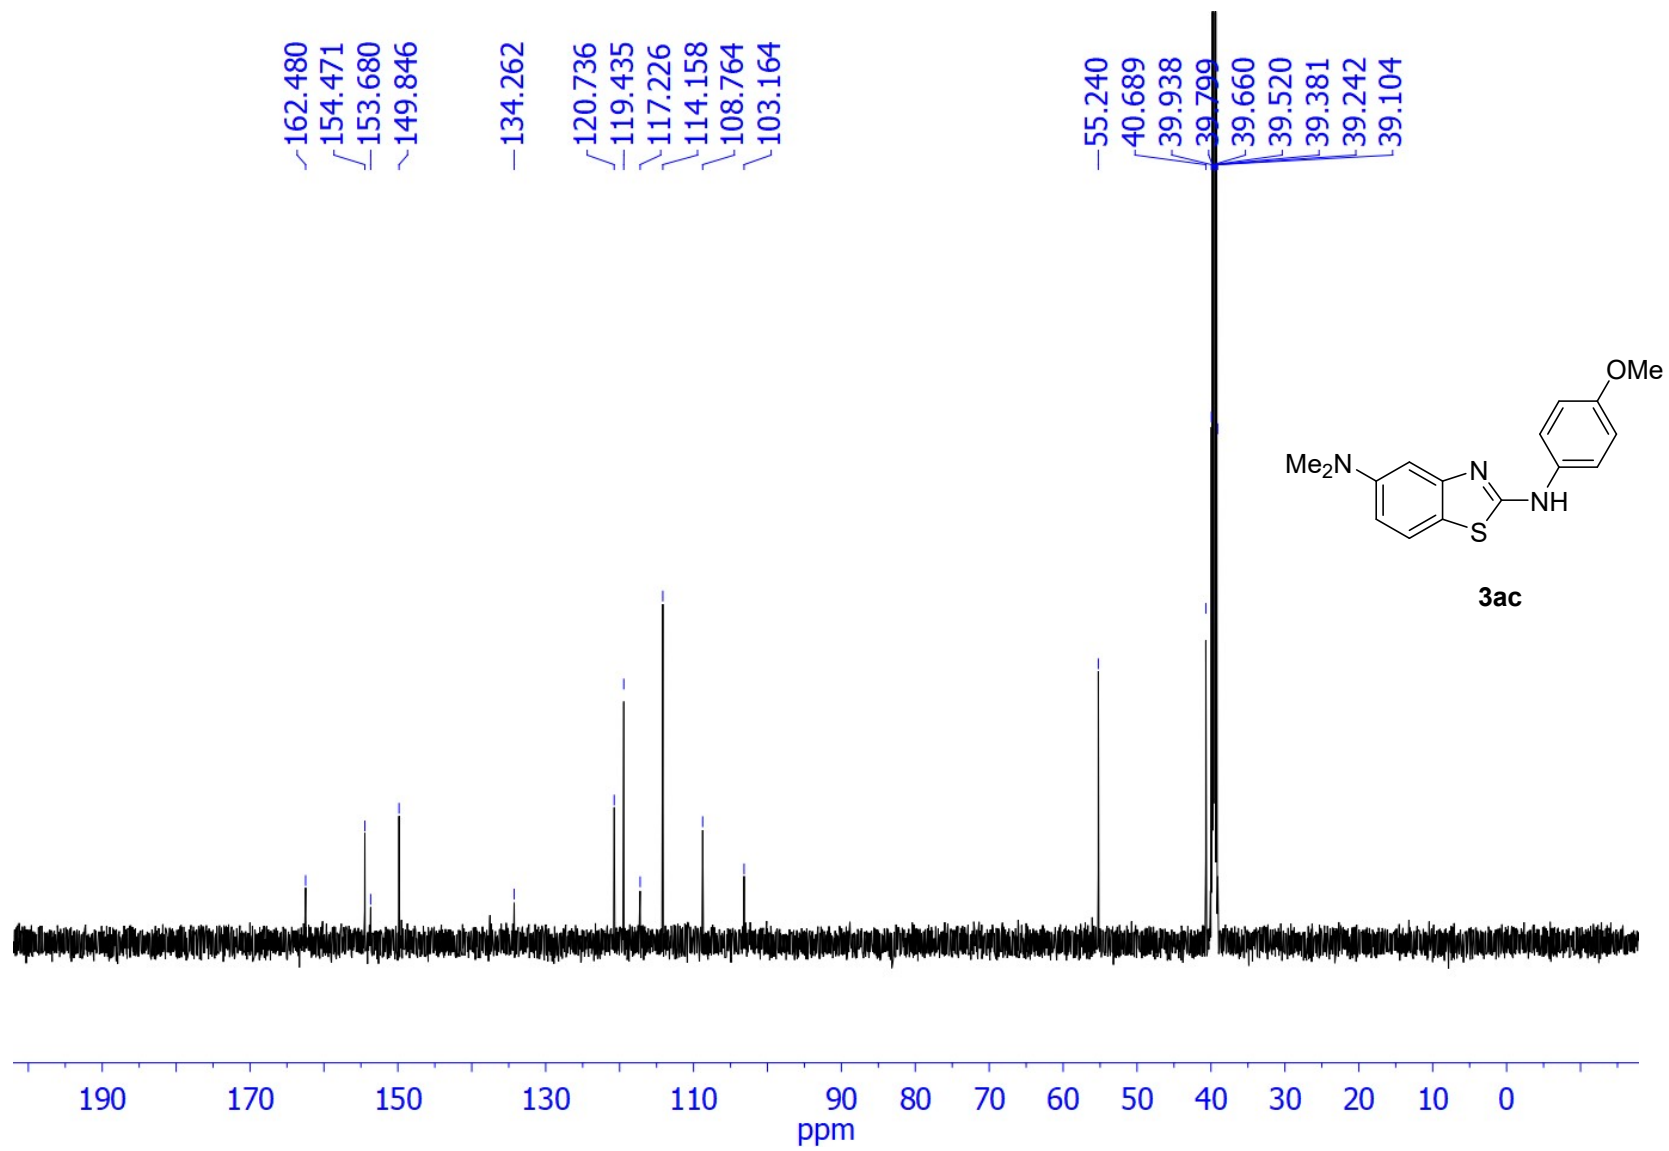

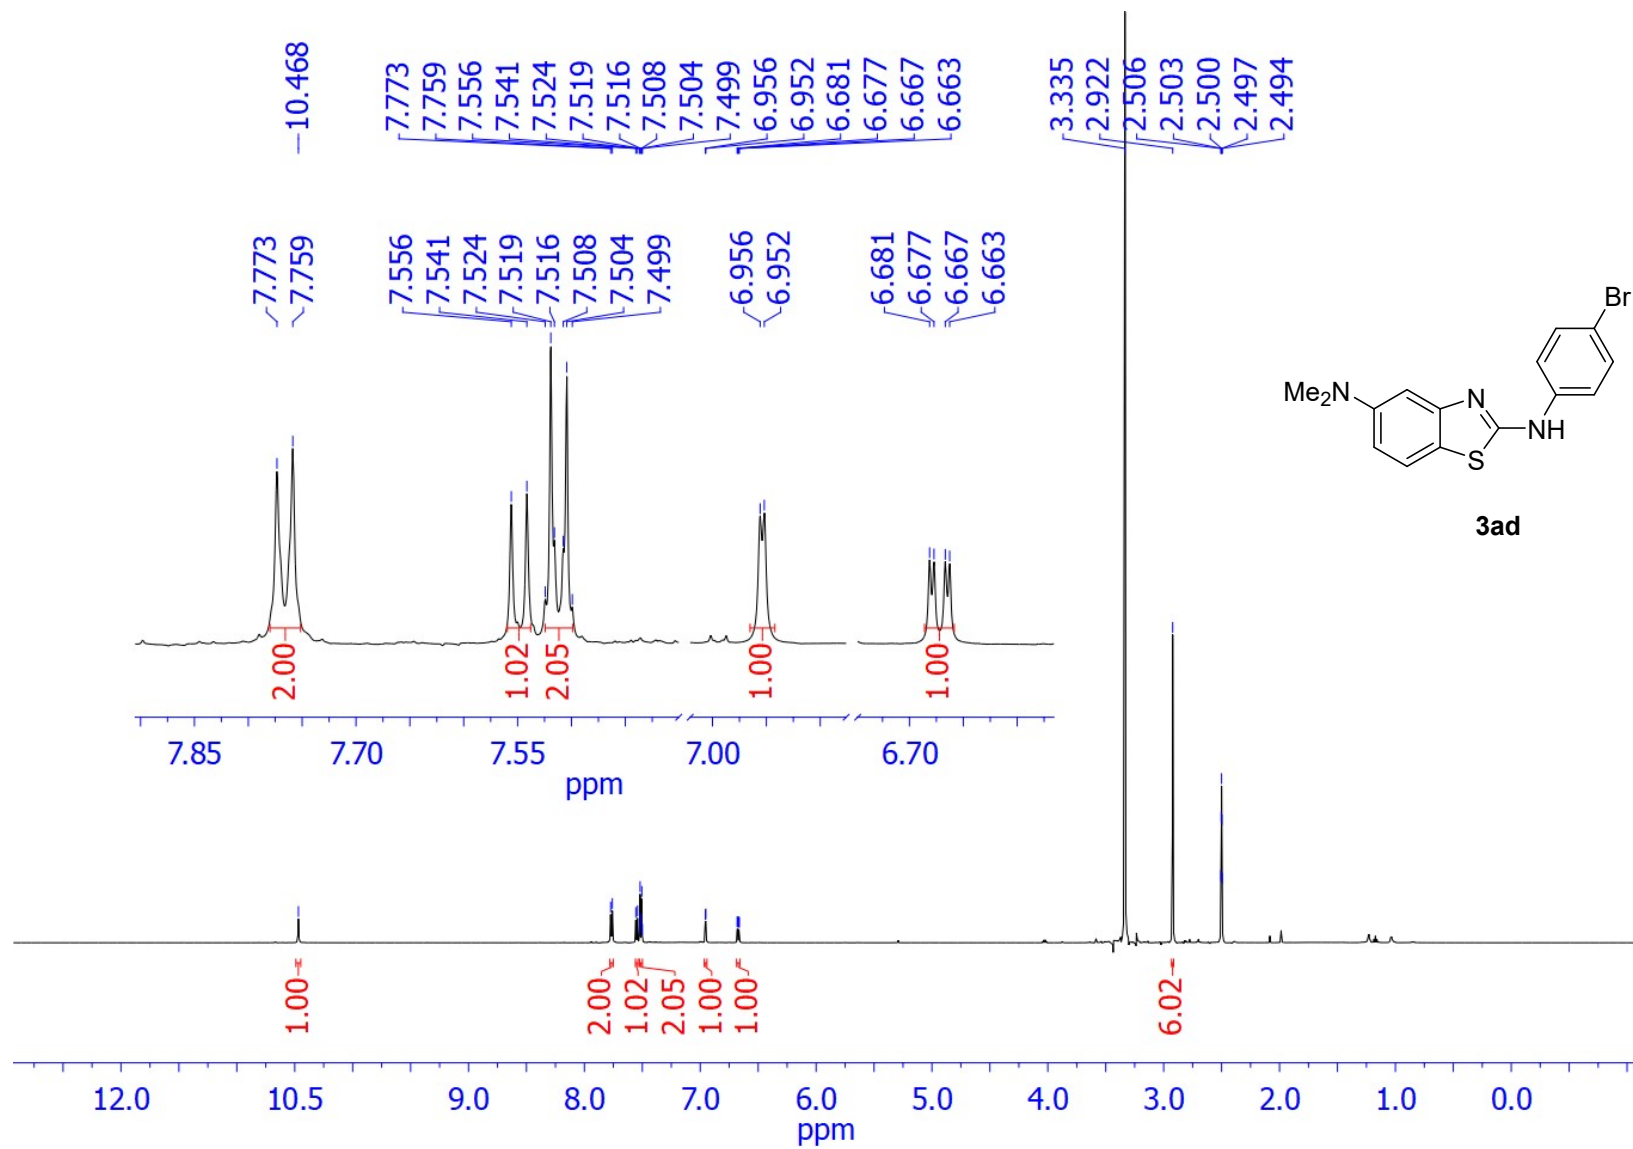

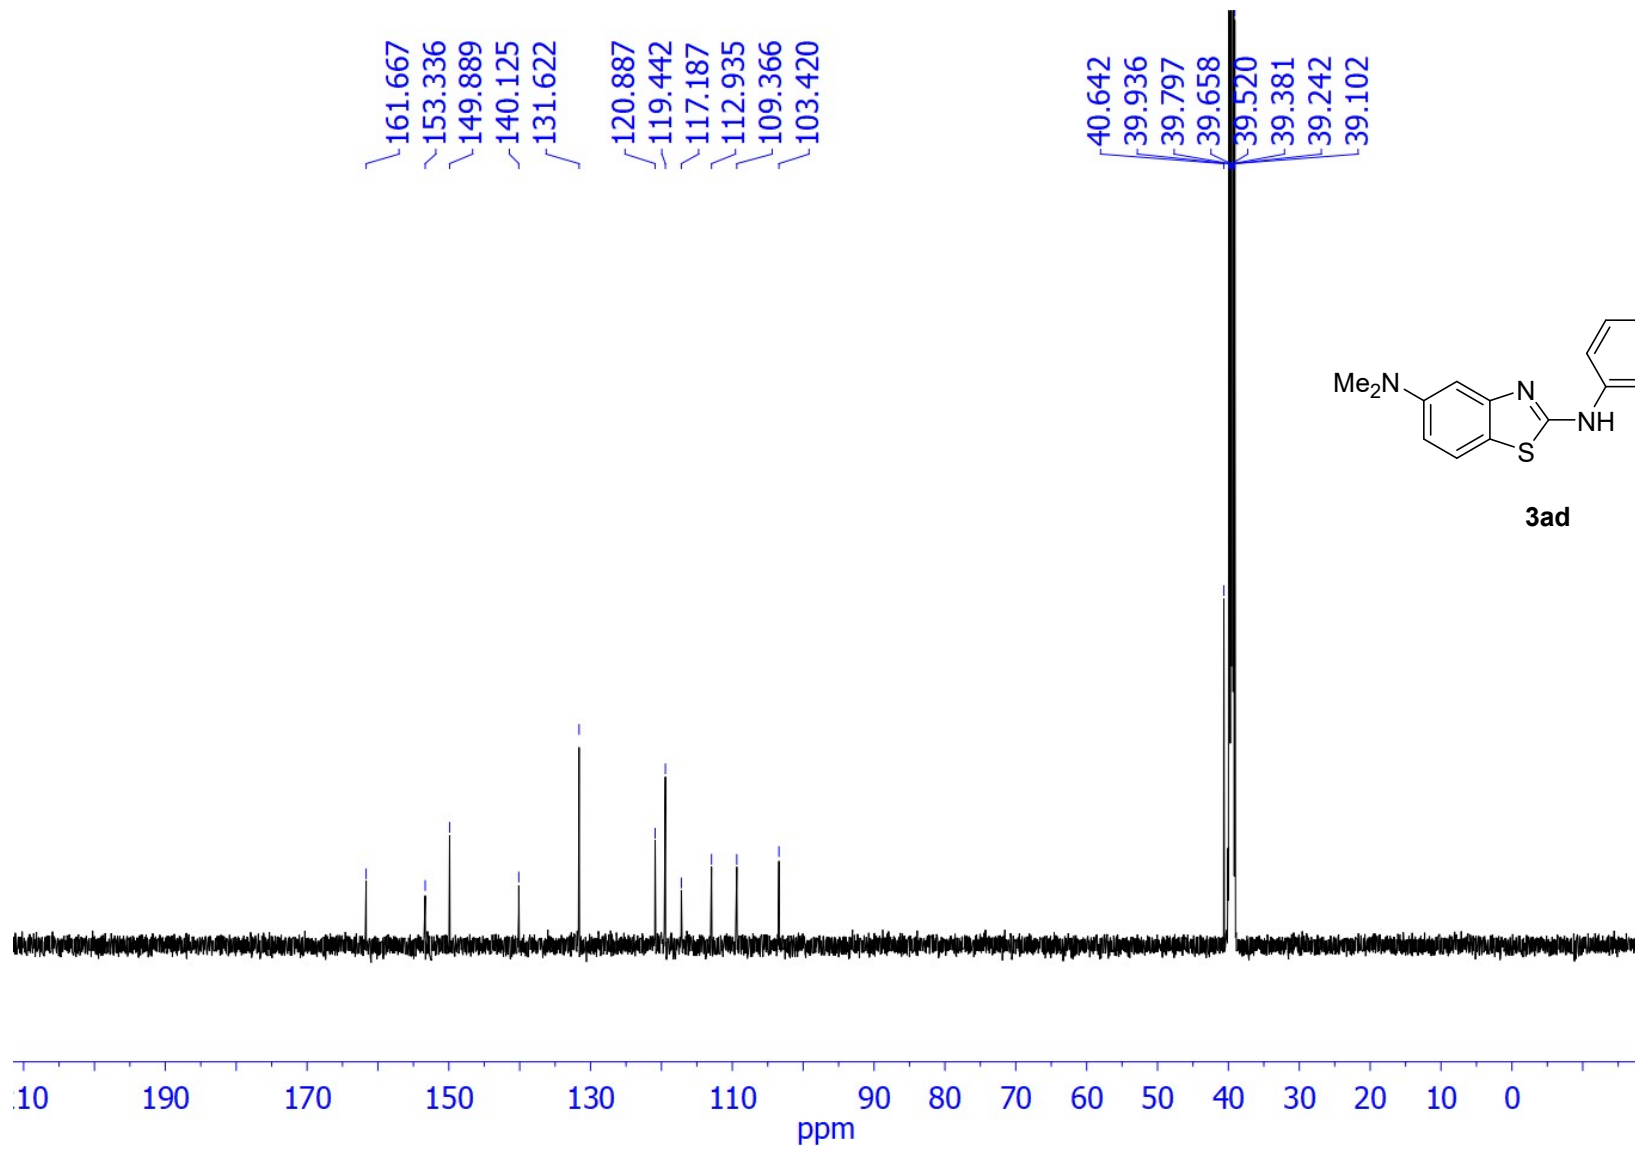

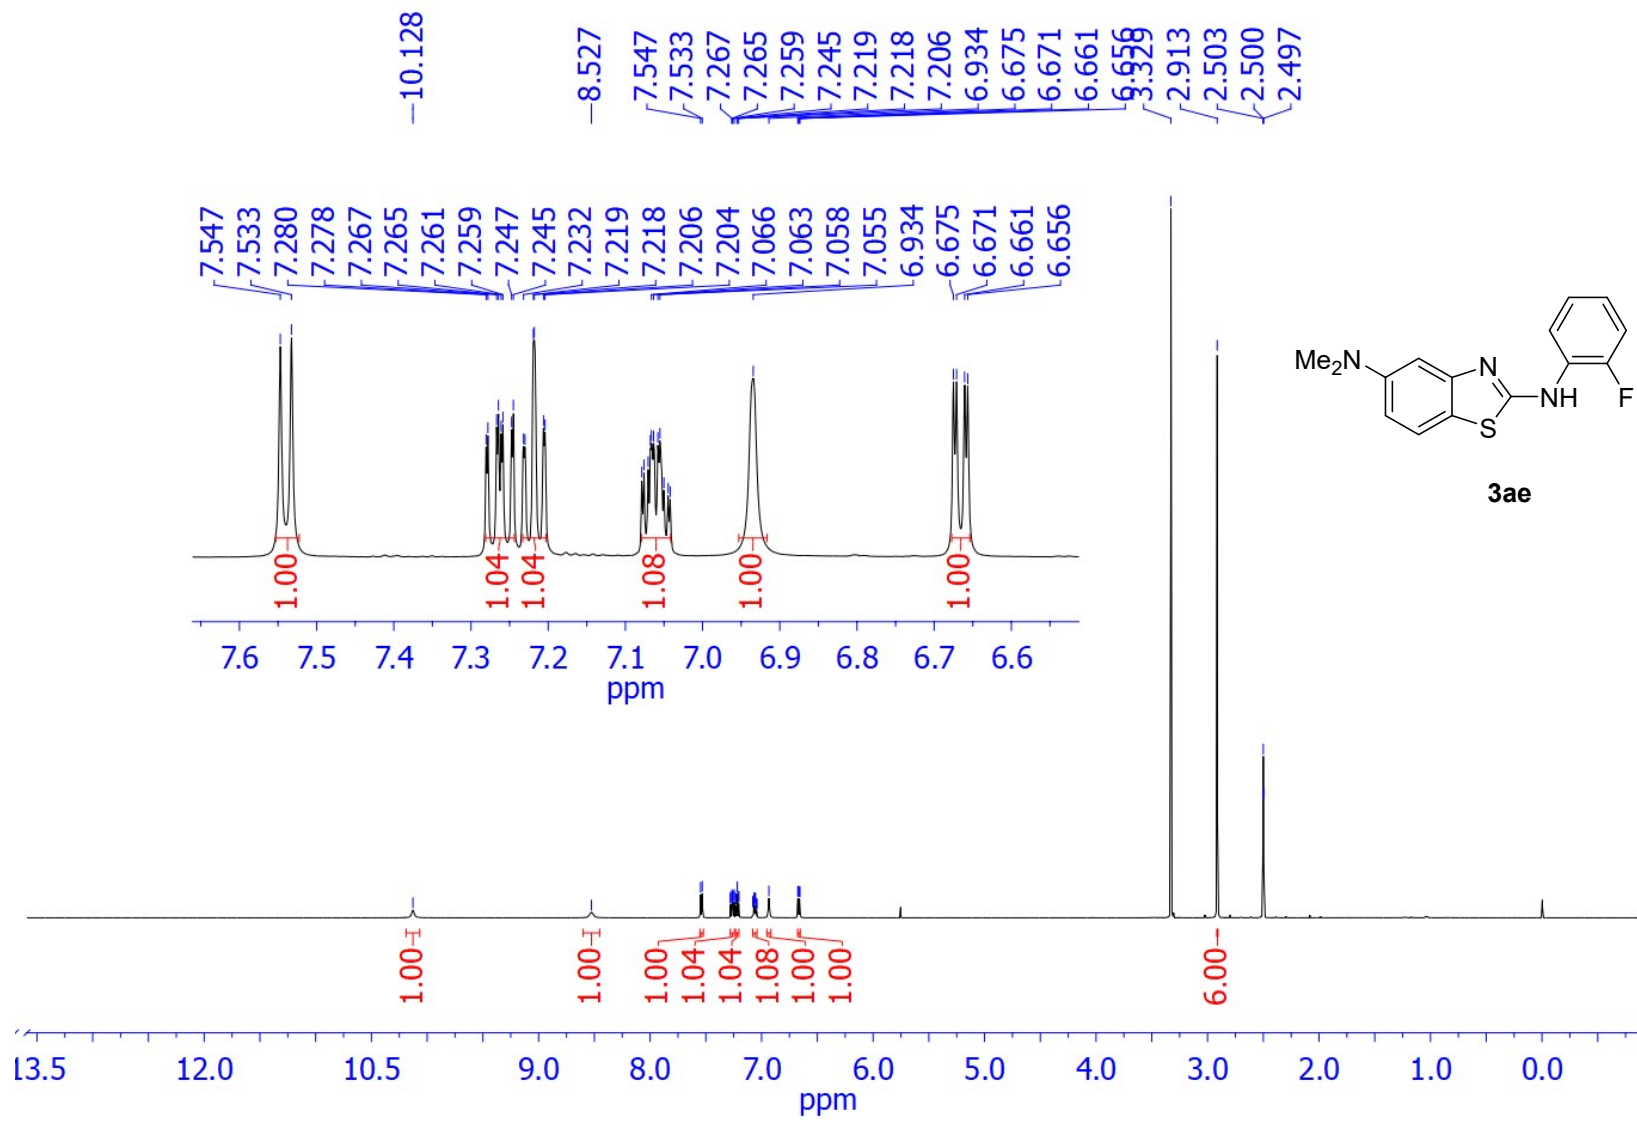

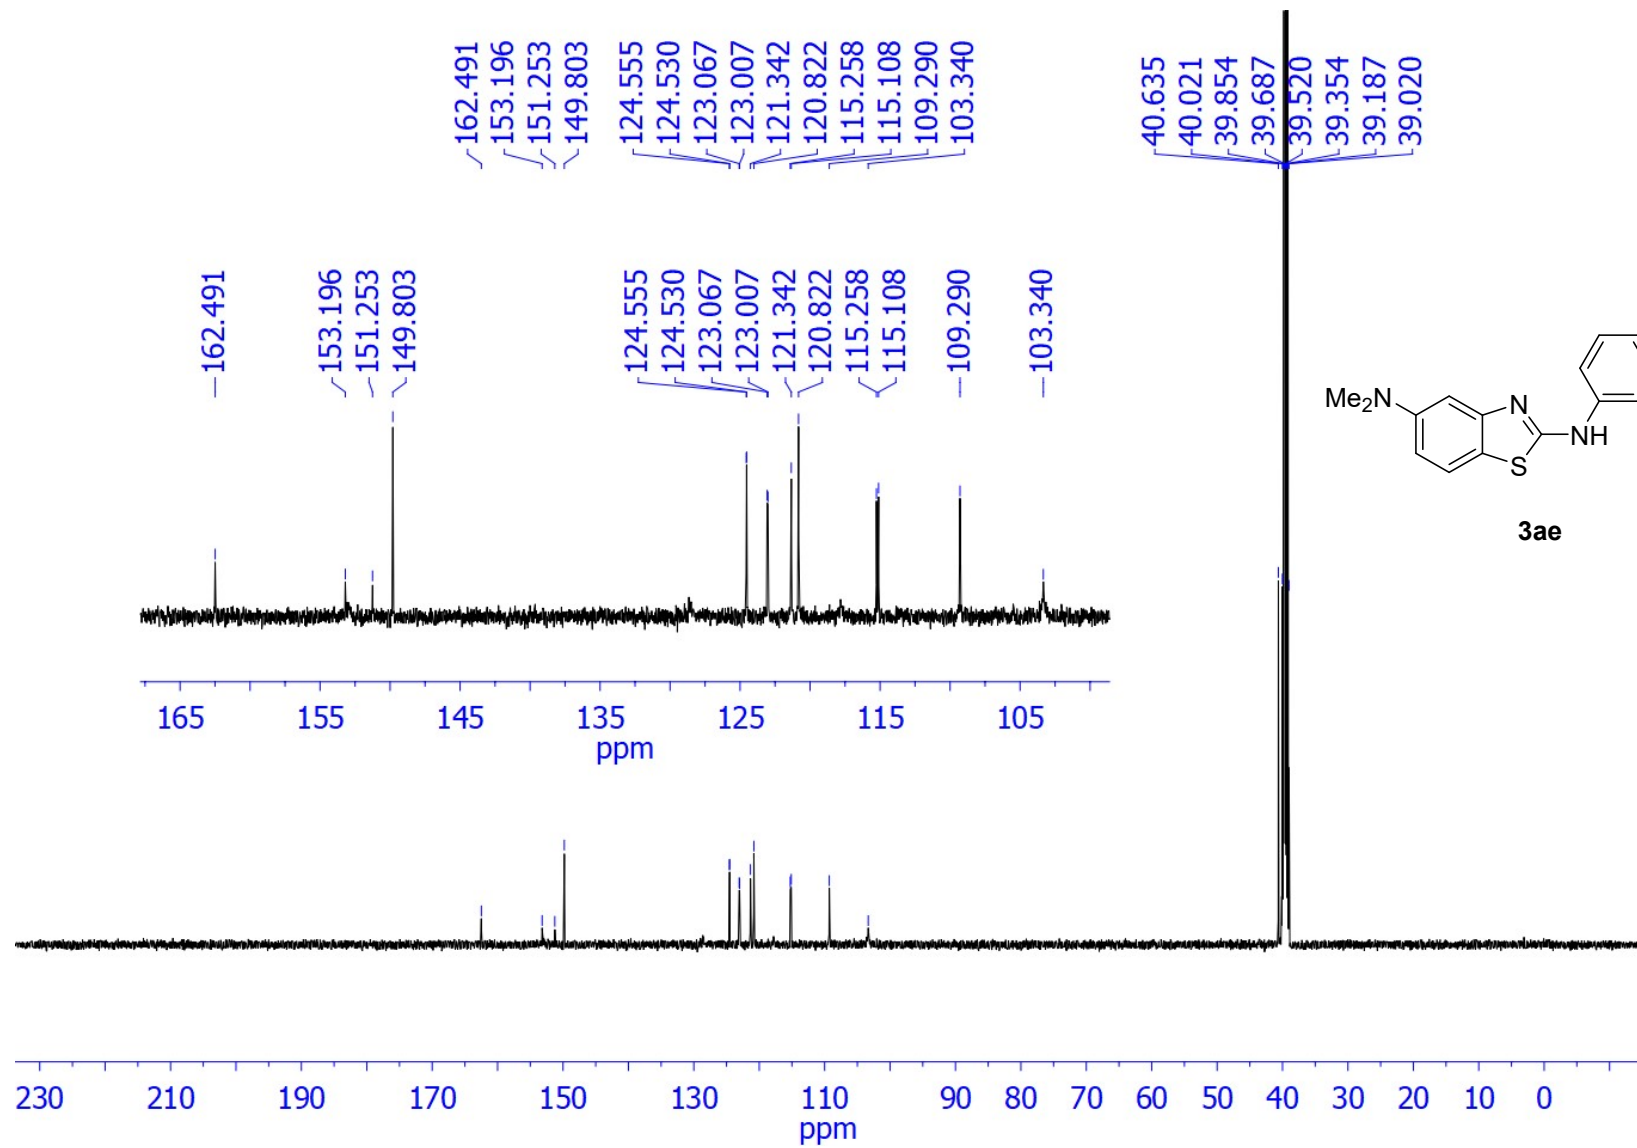



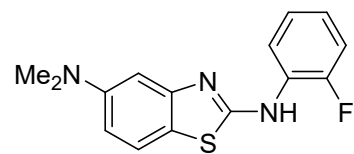

**3ae**

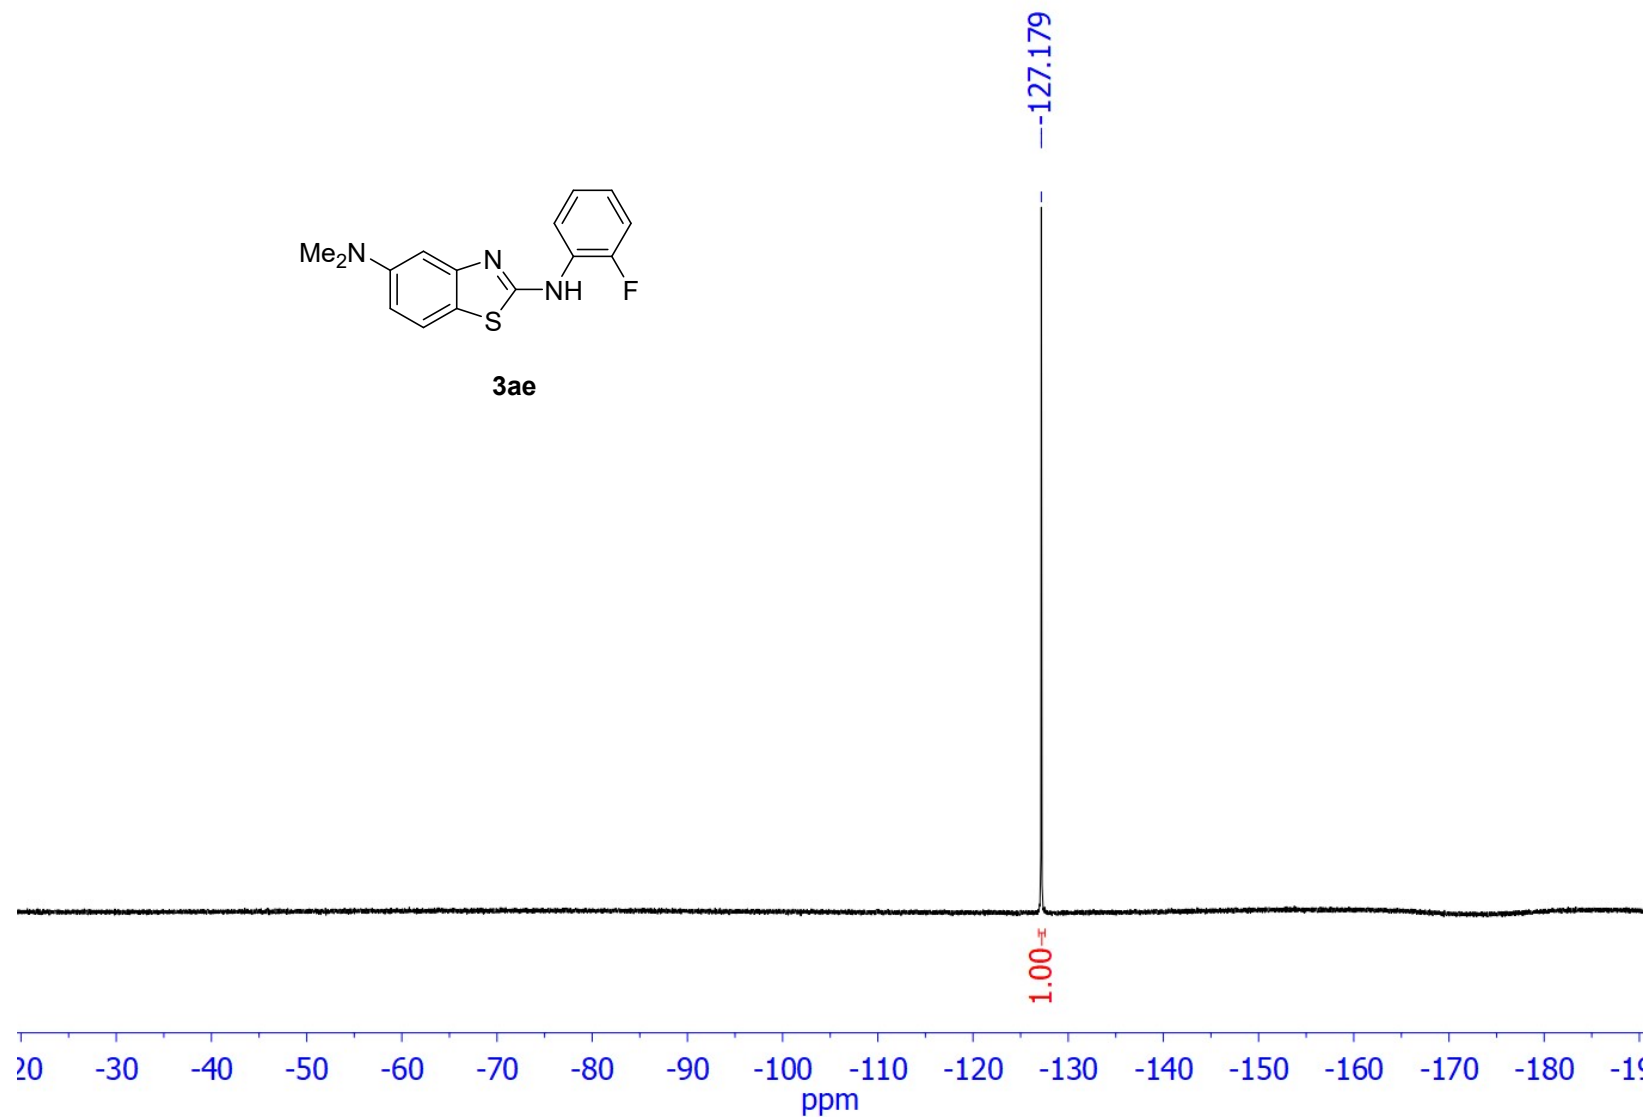

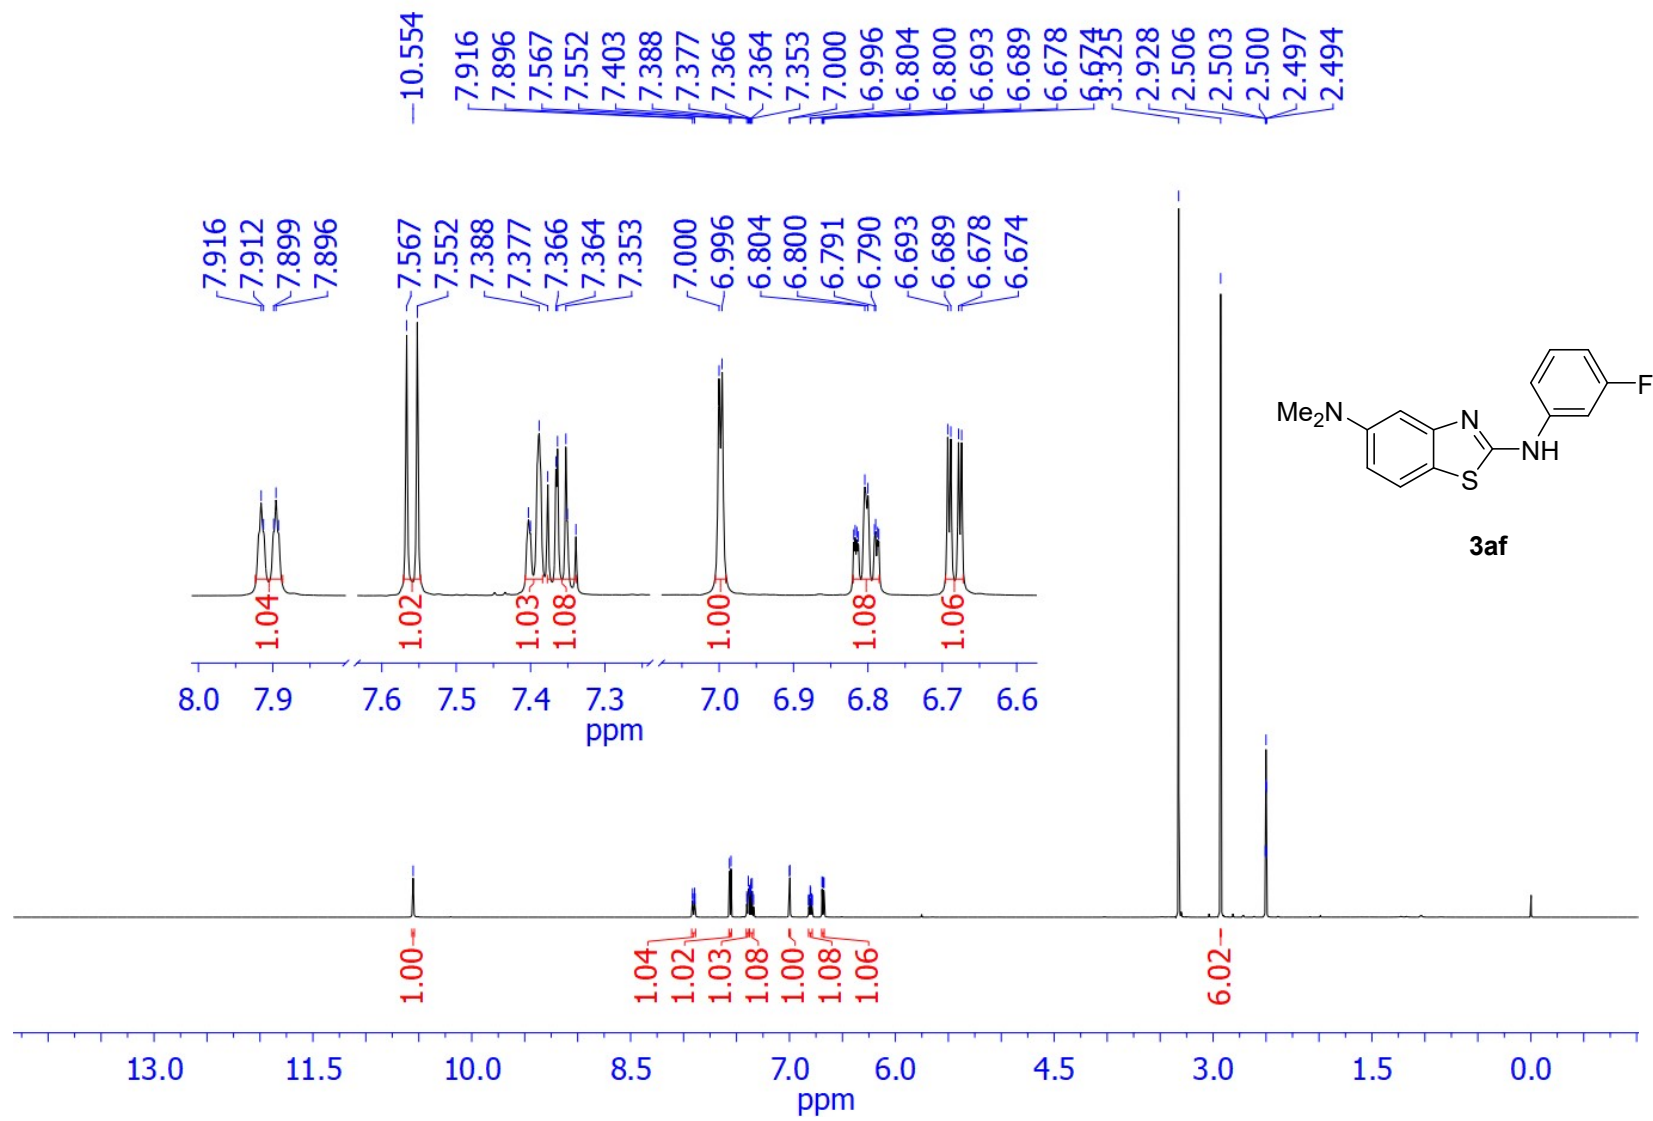

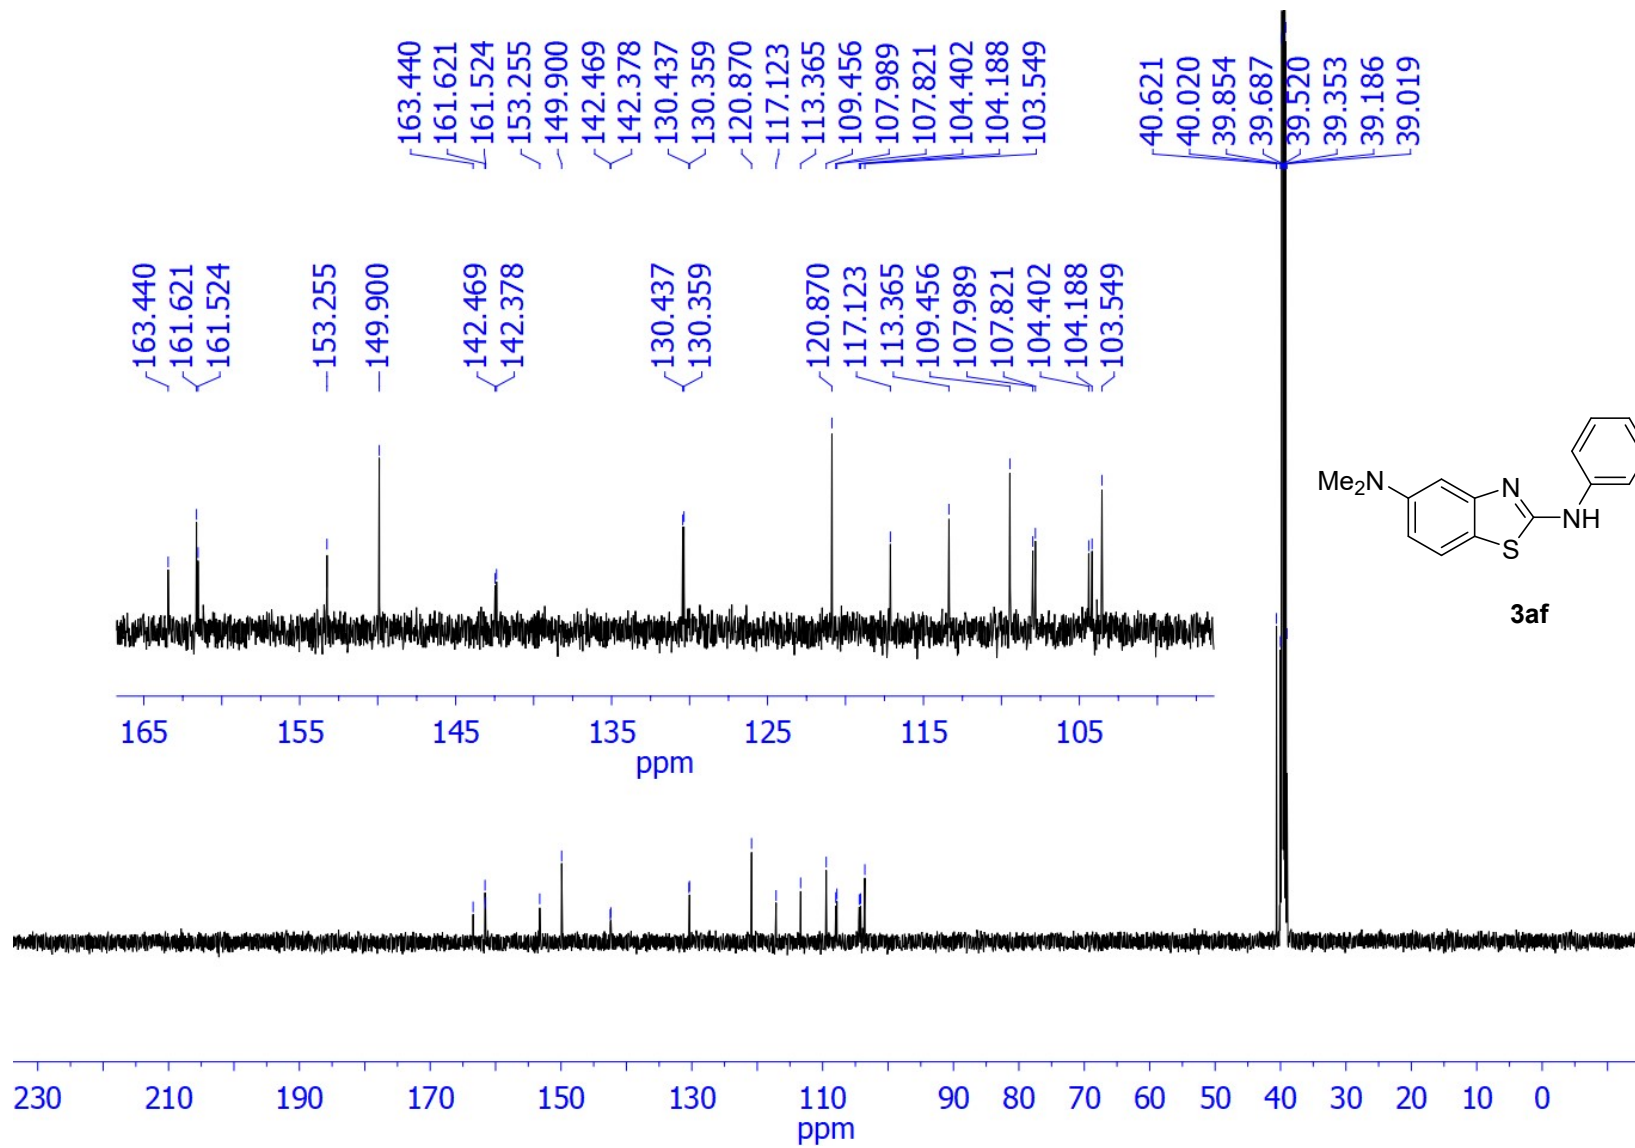

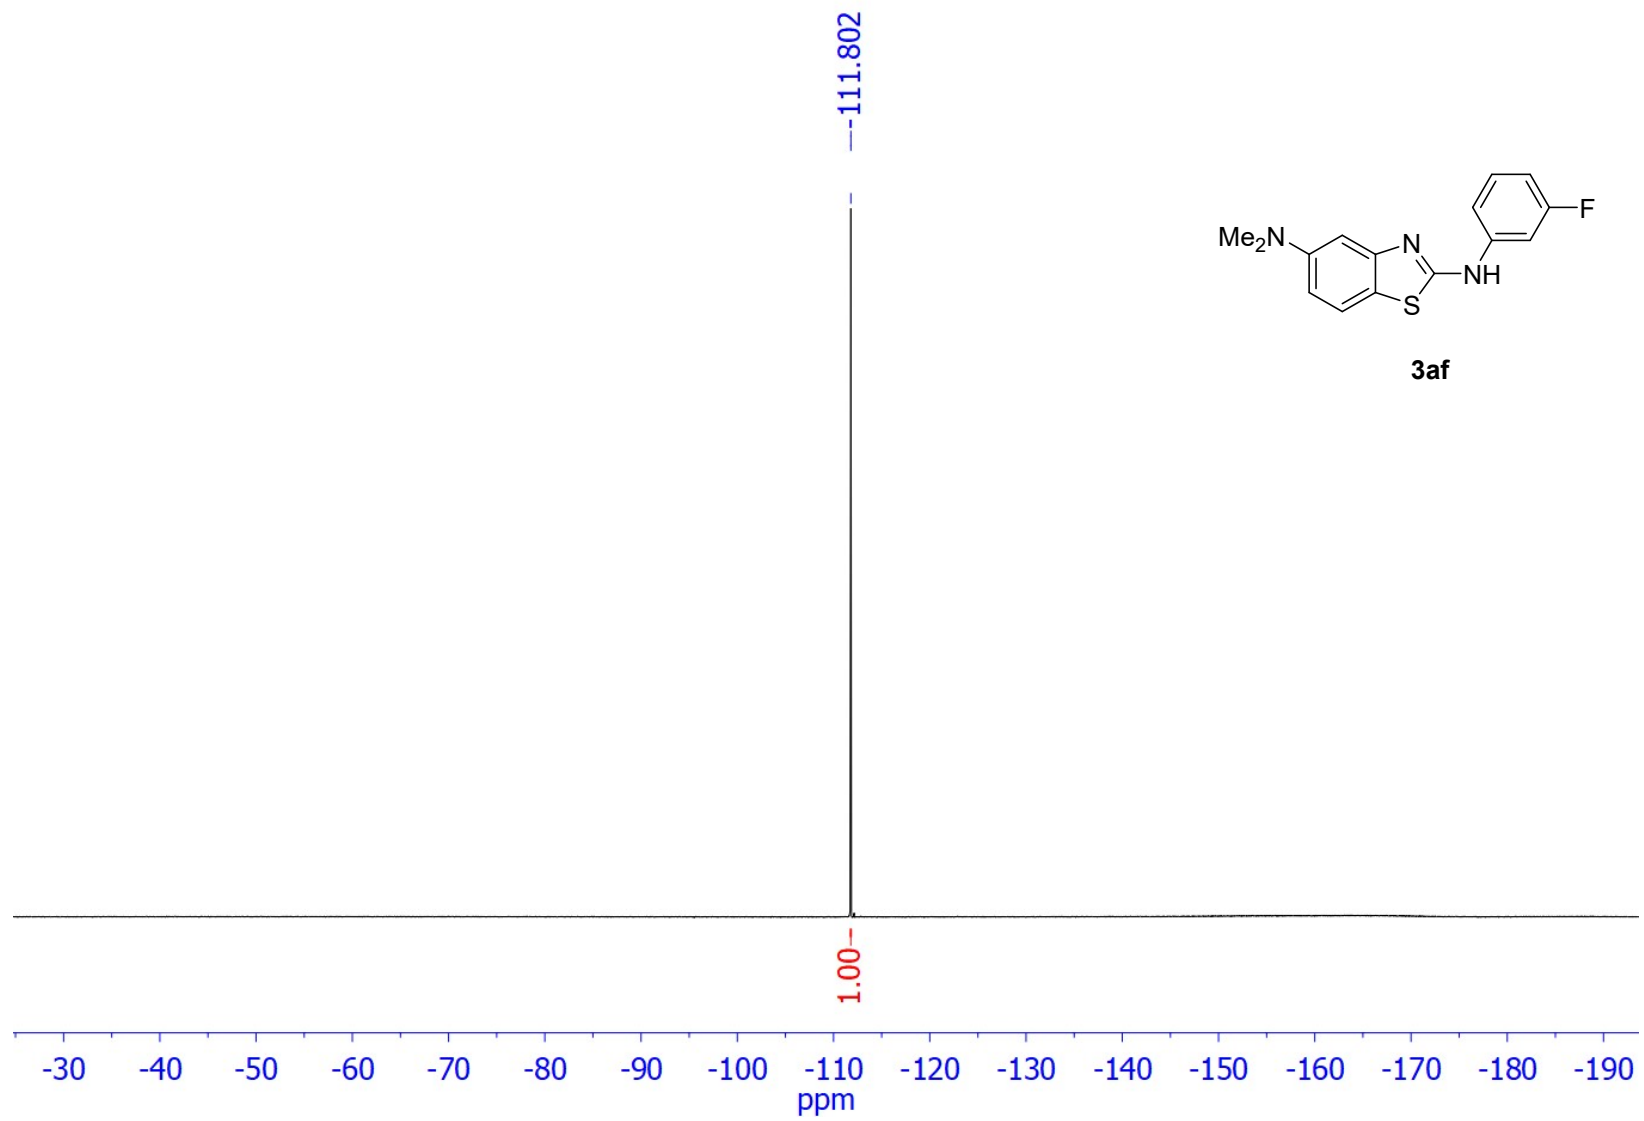

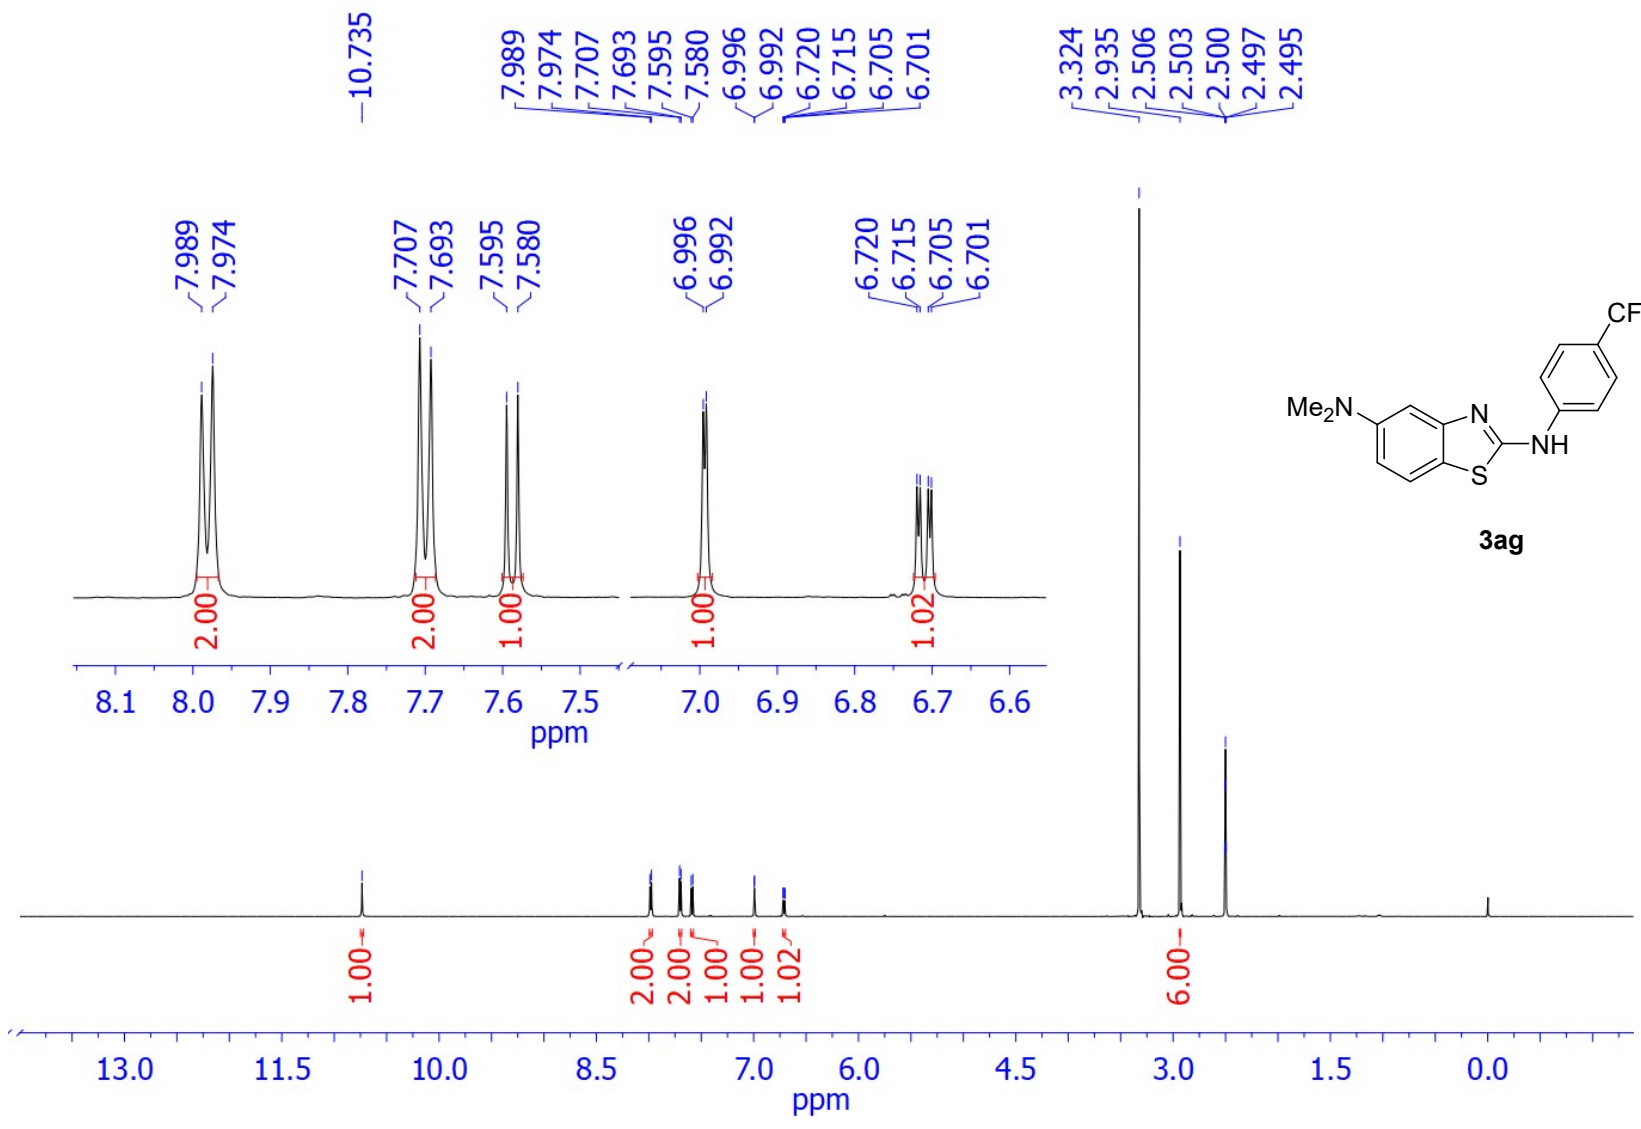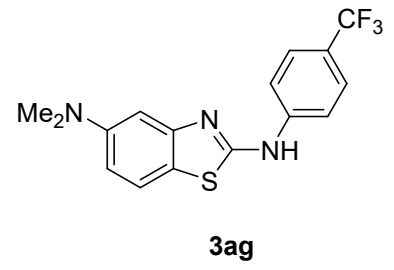

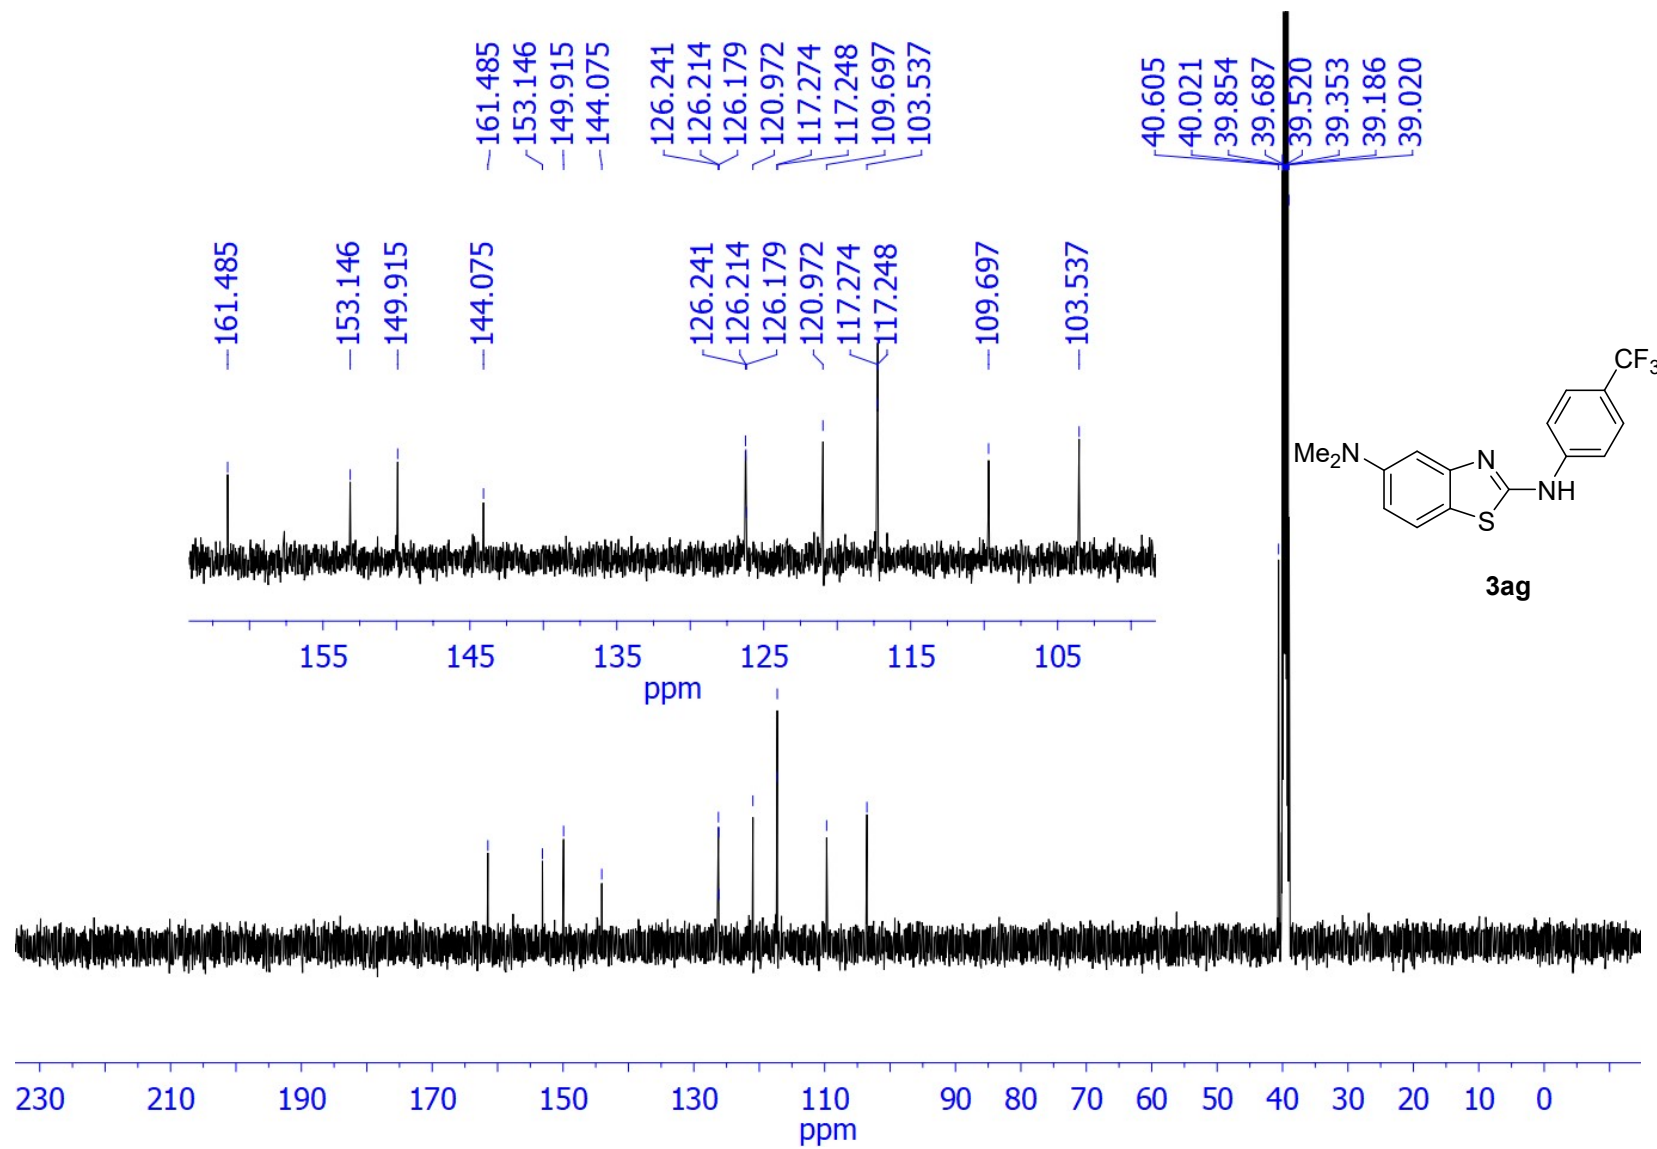

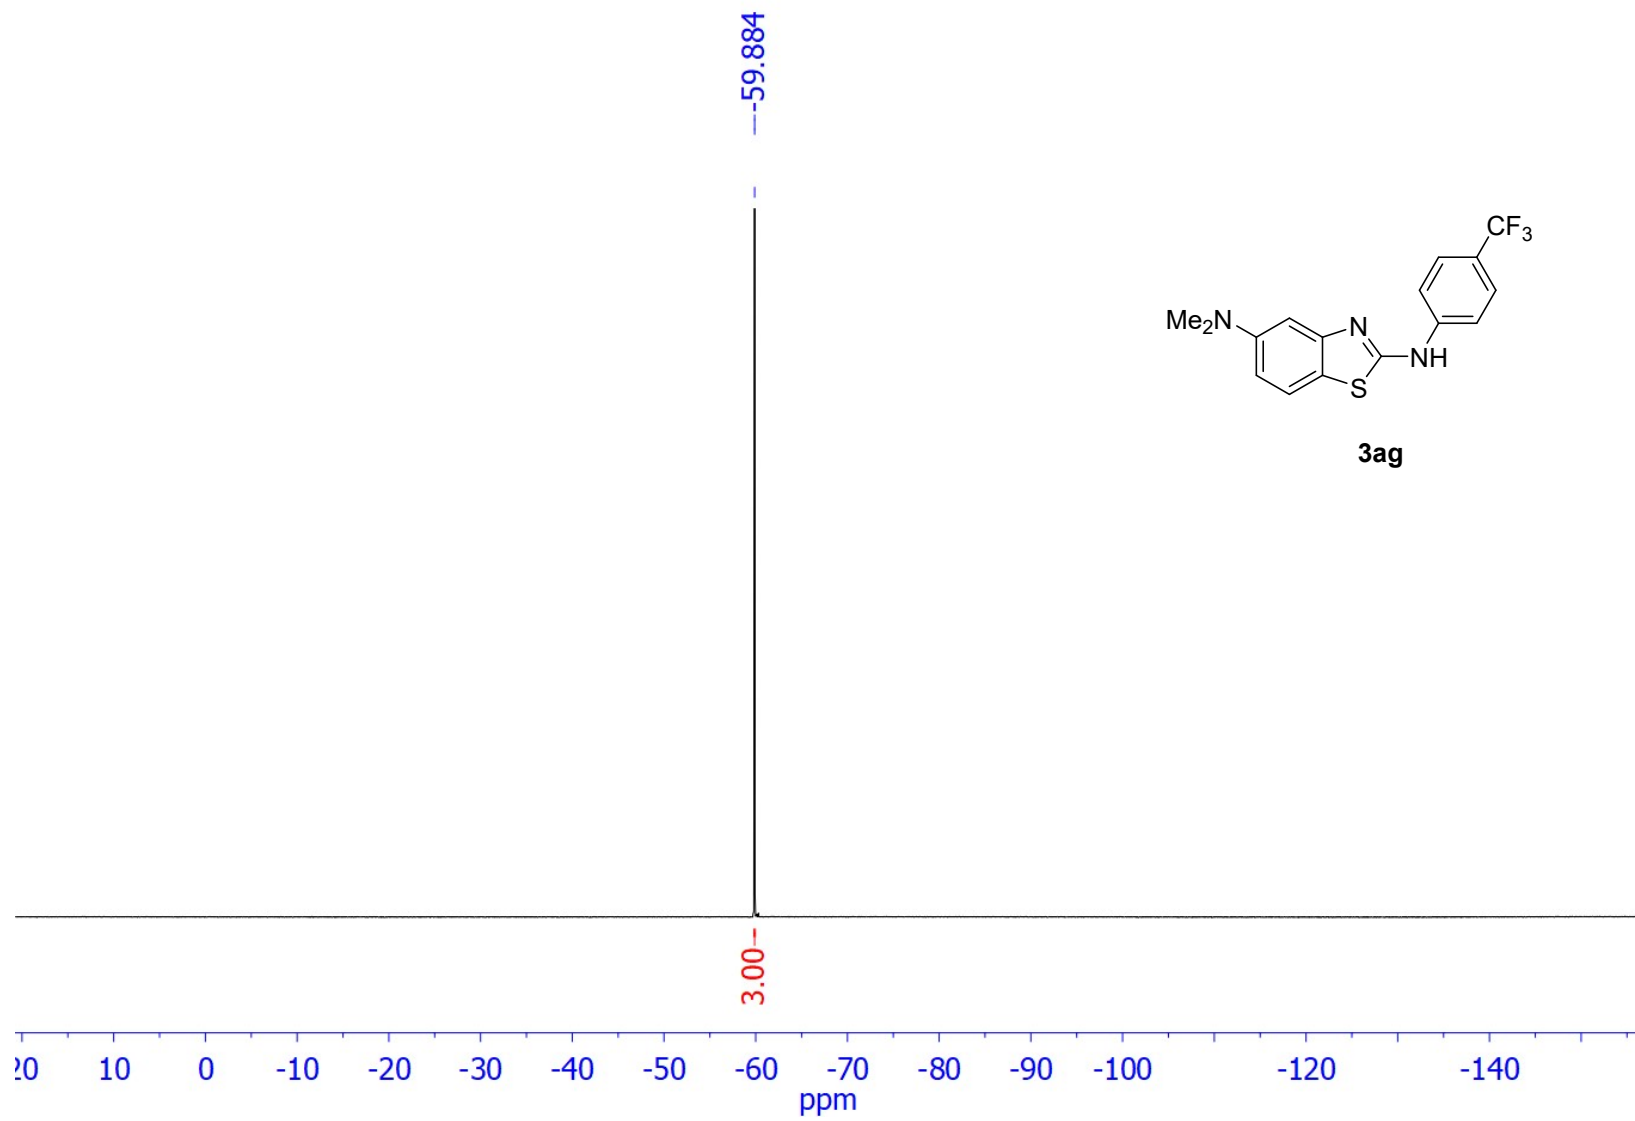

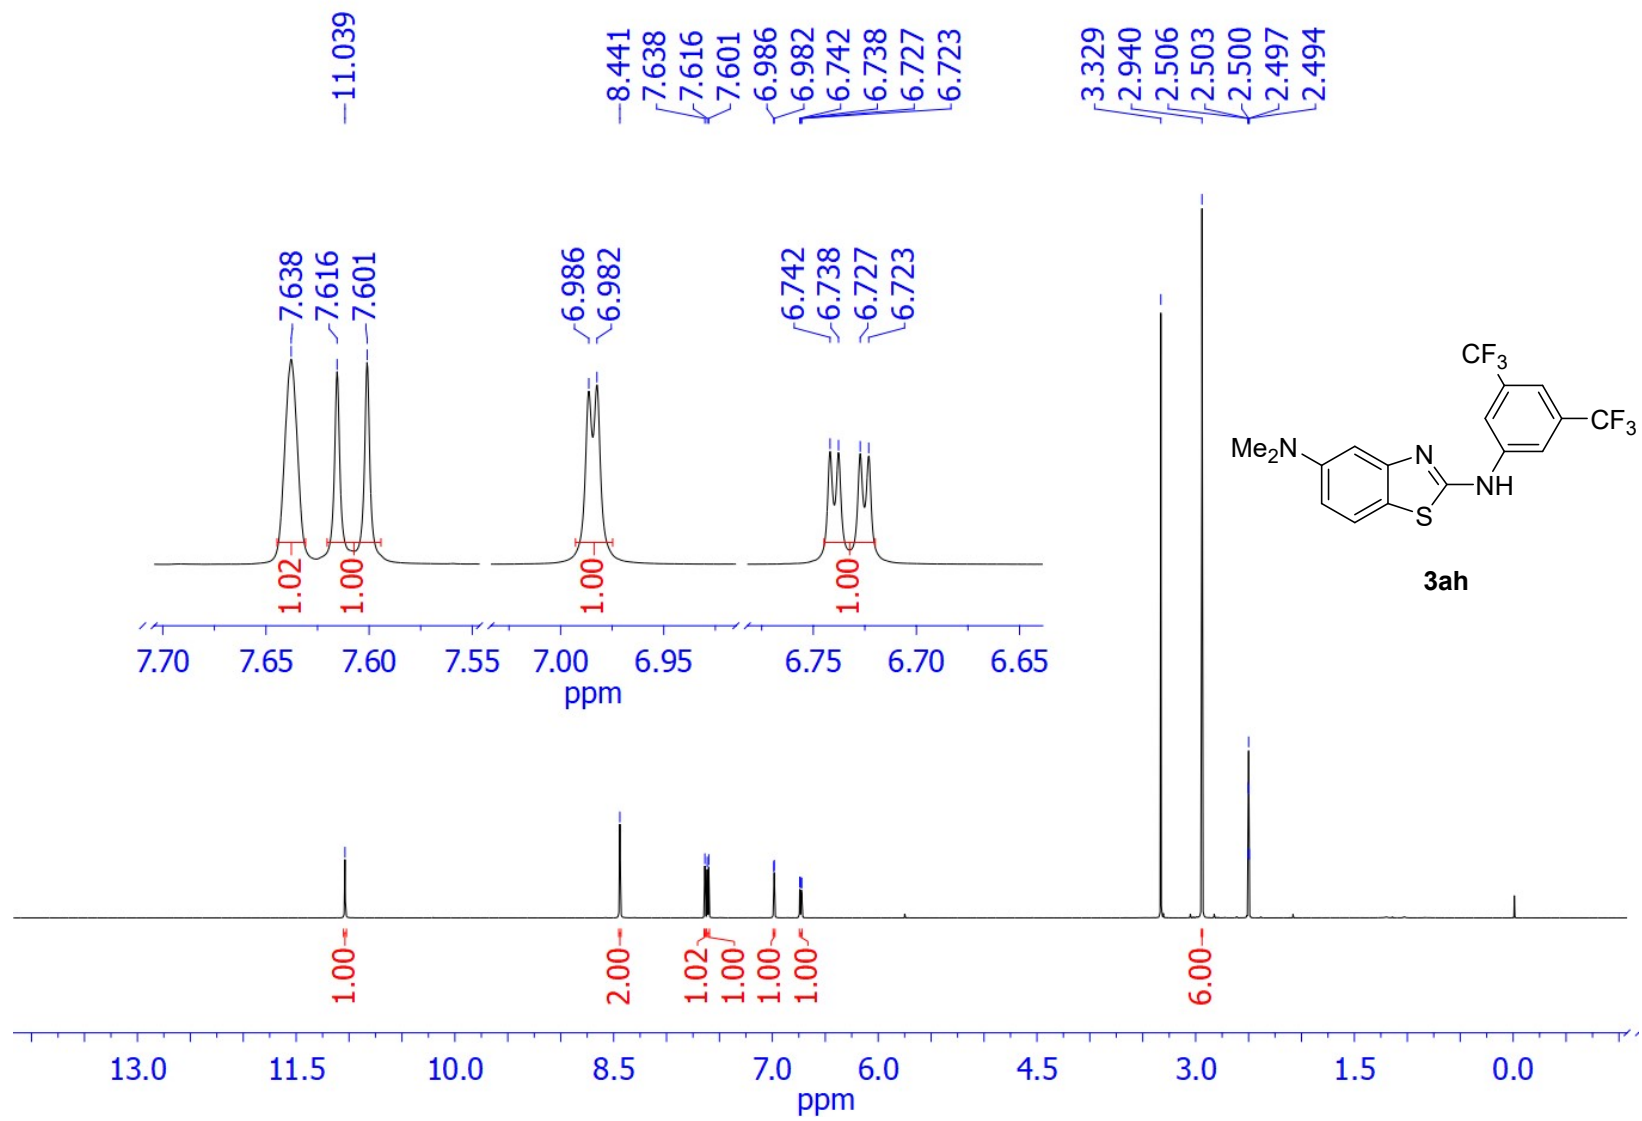



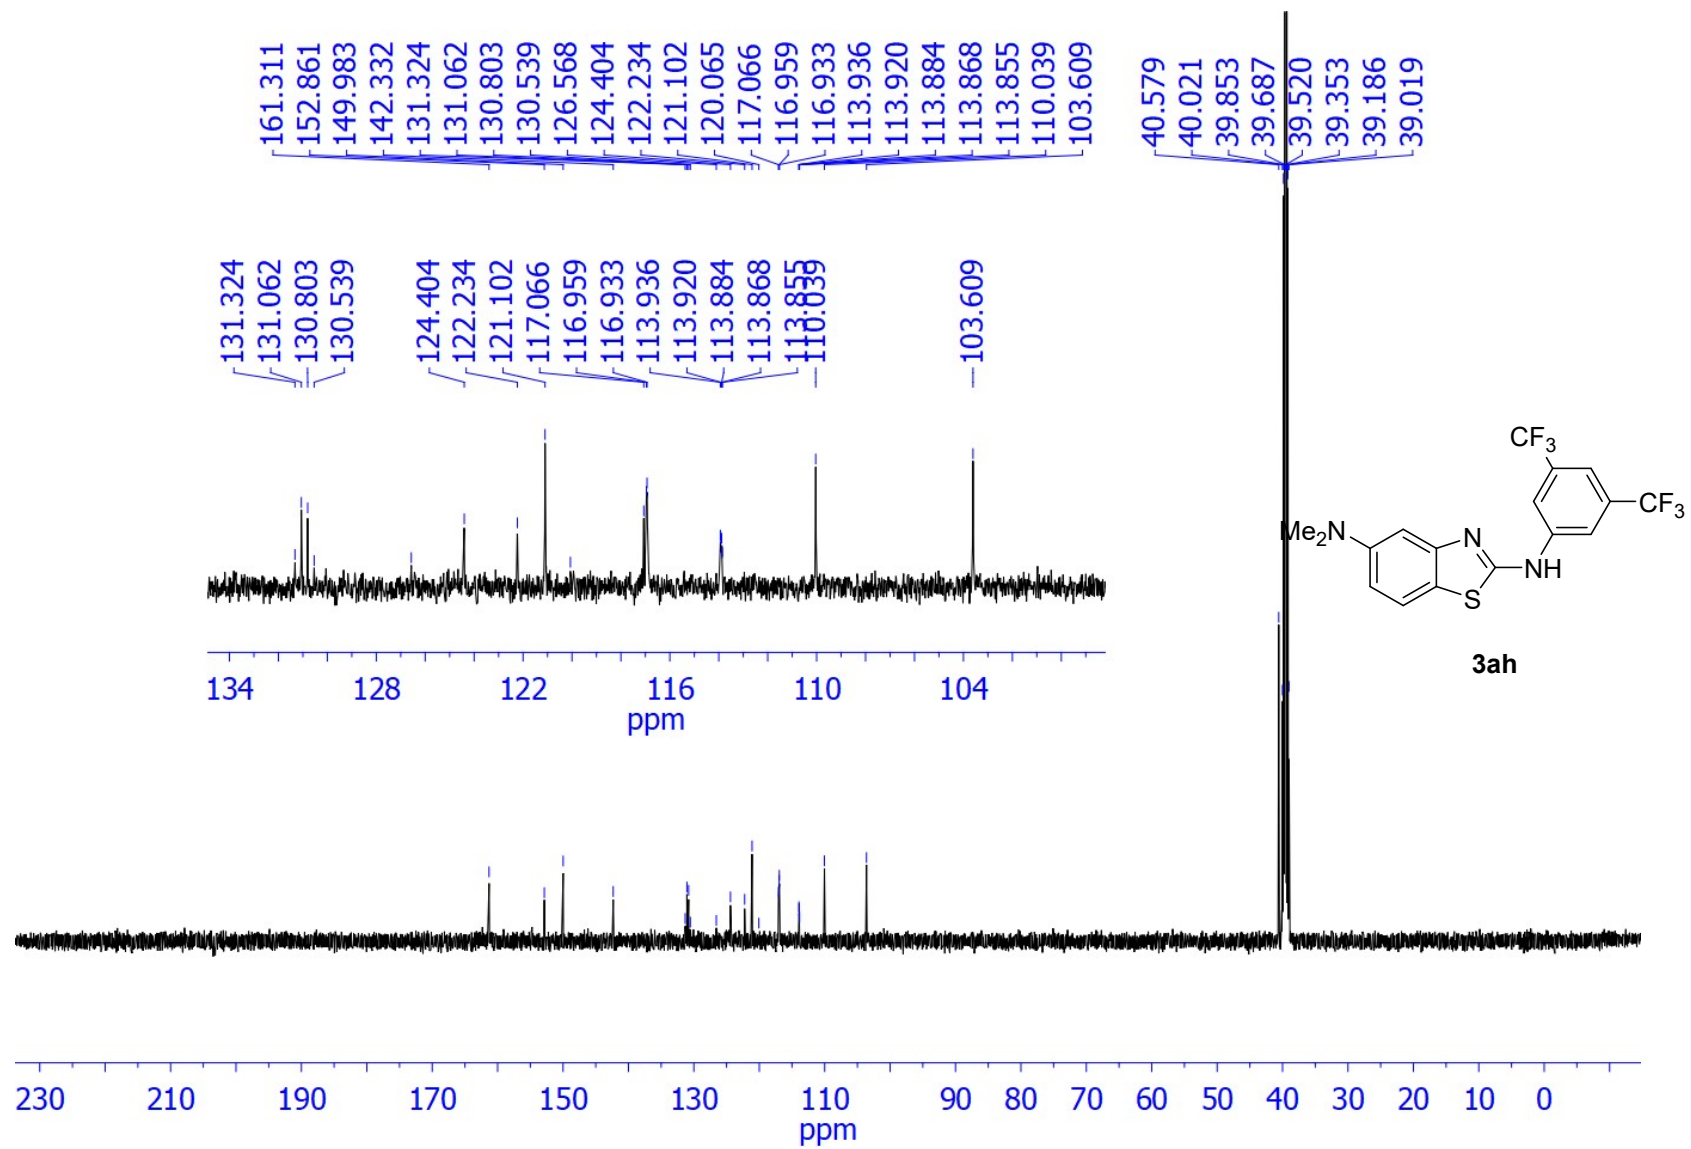

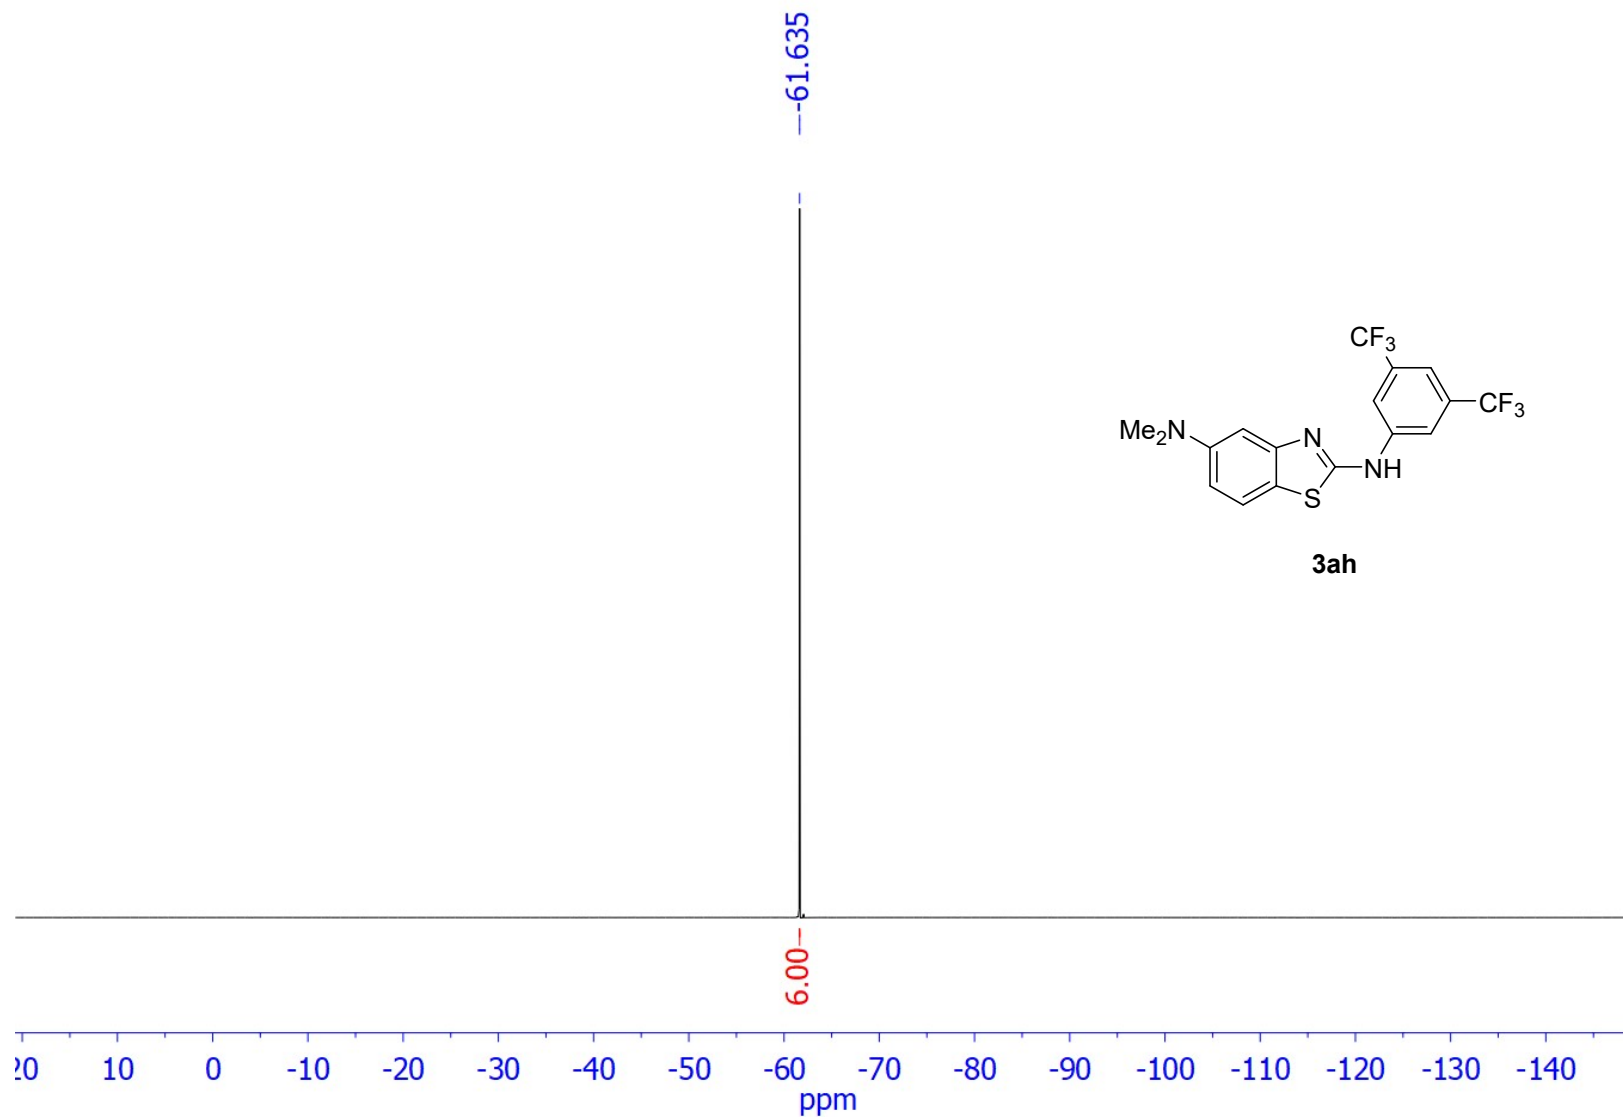

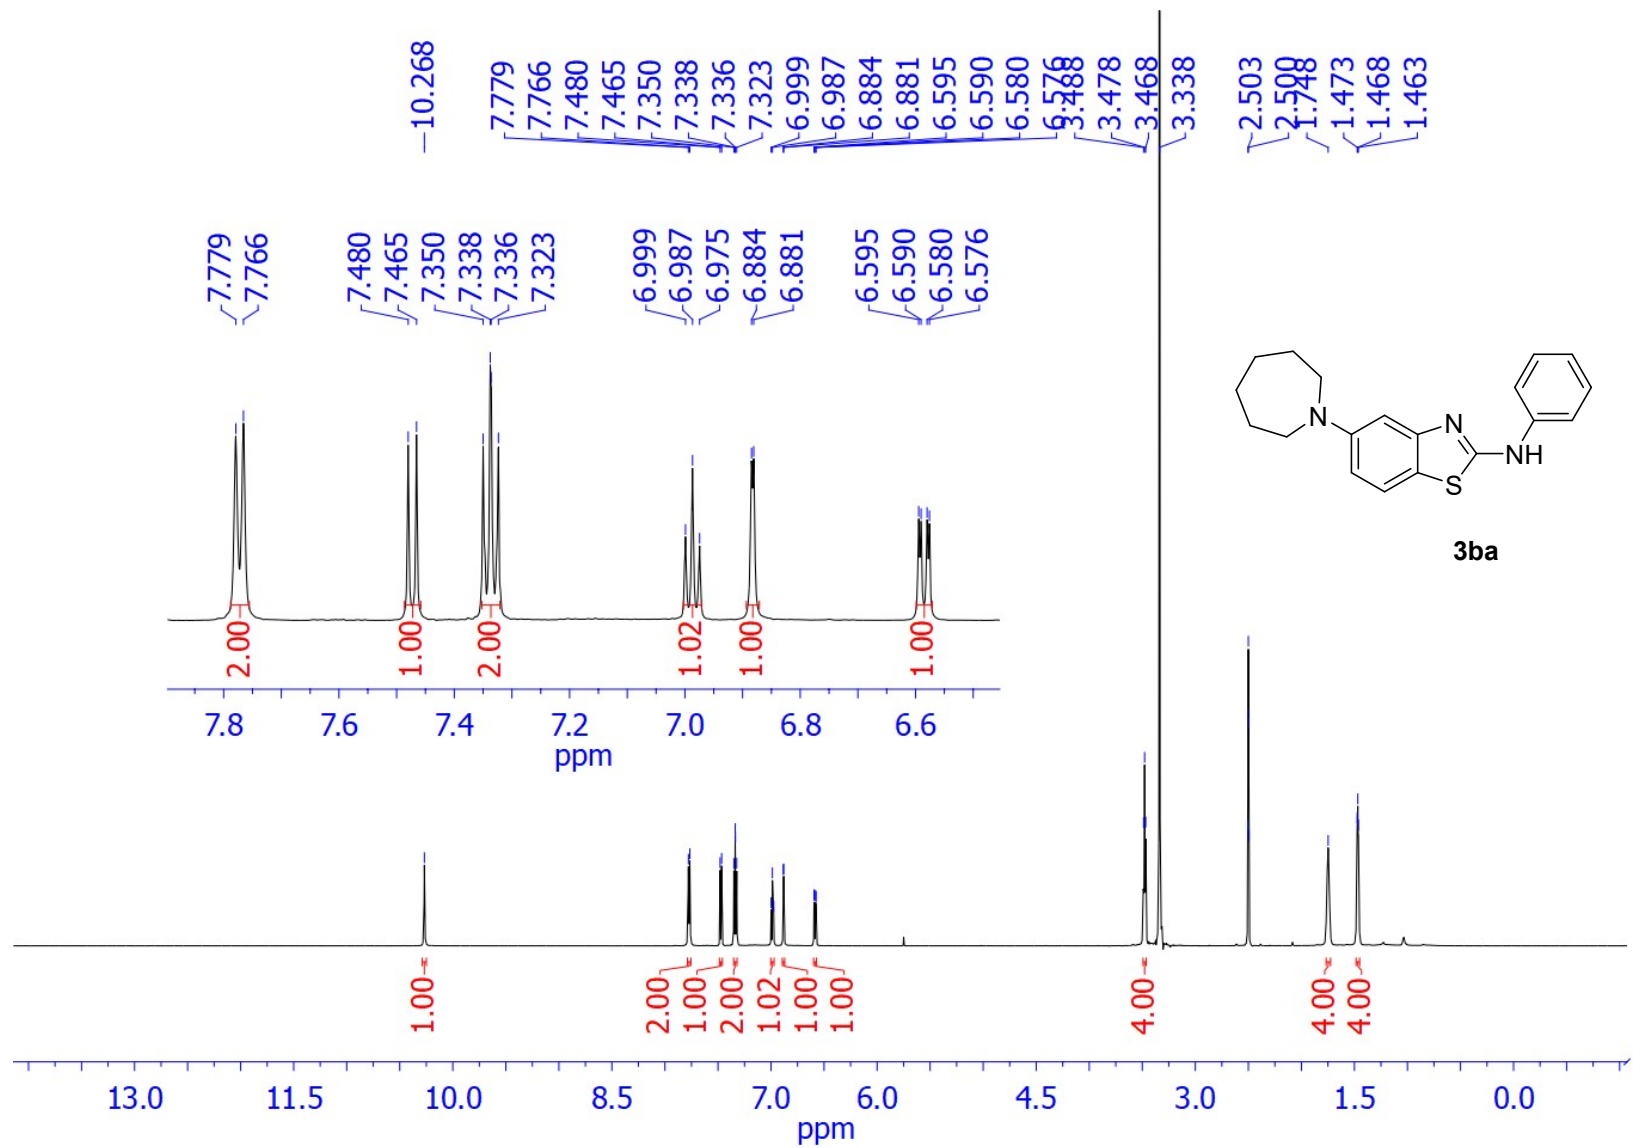

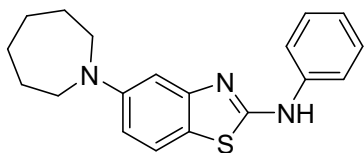

3ba

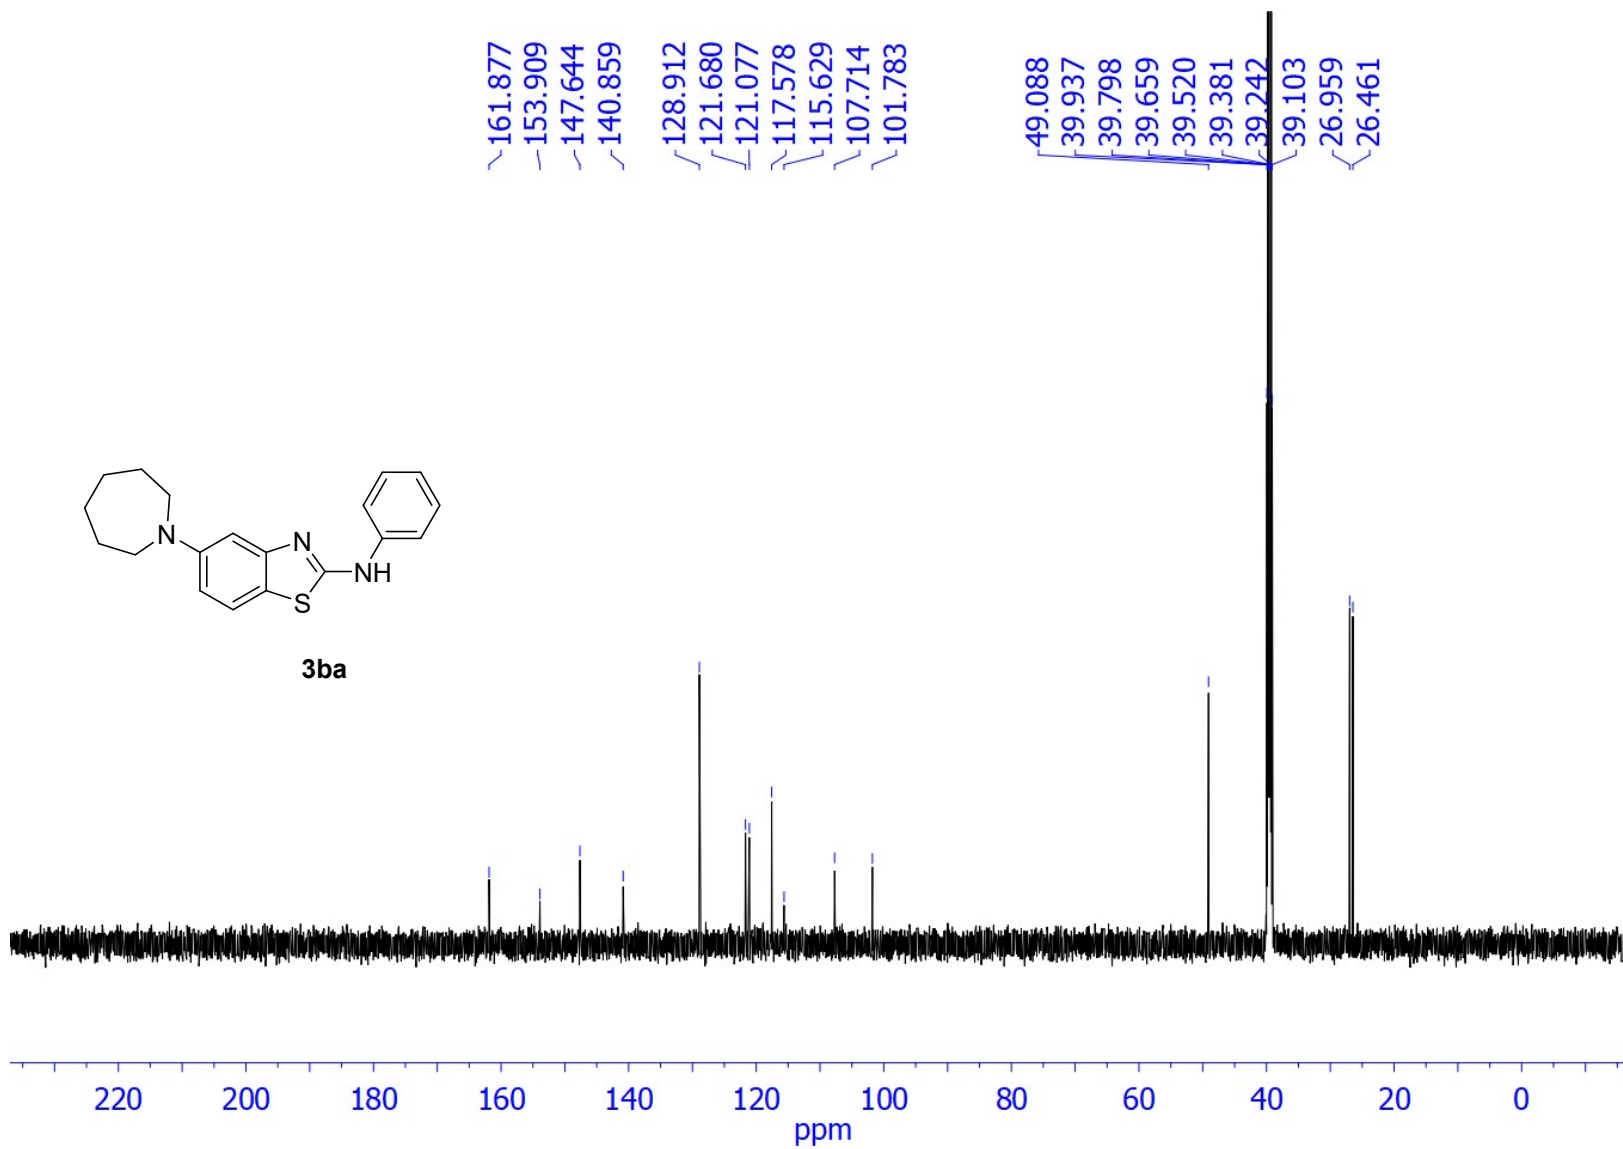

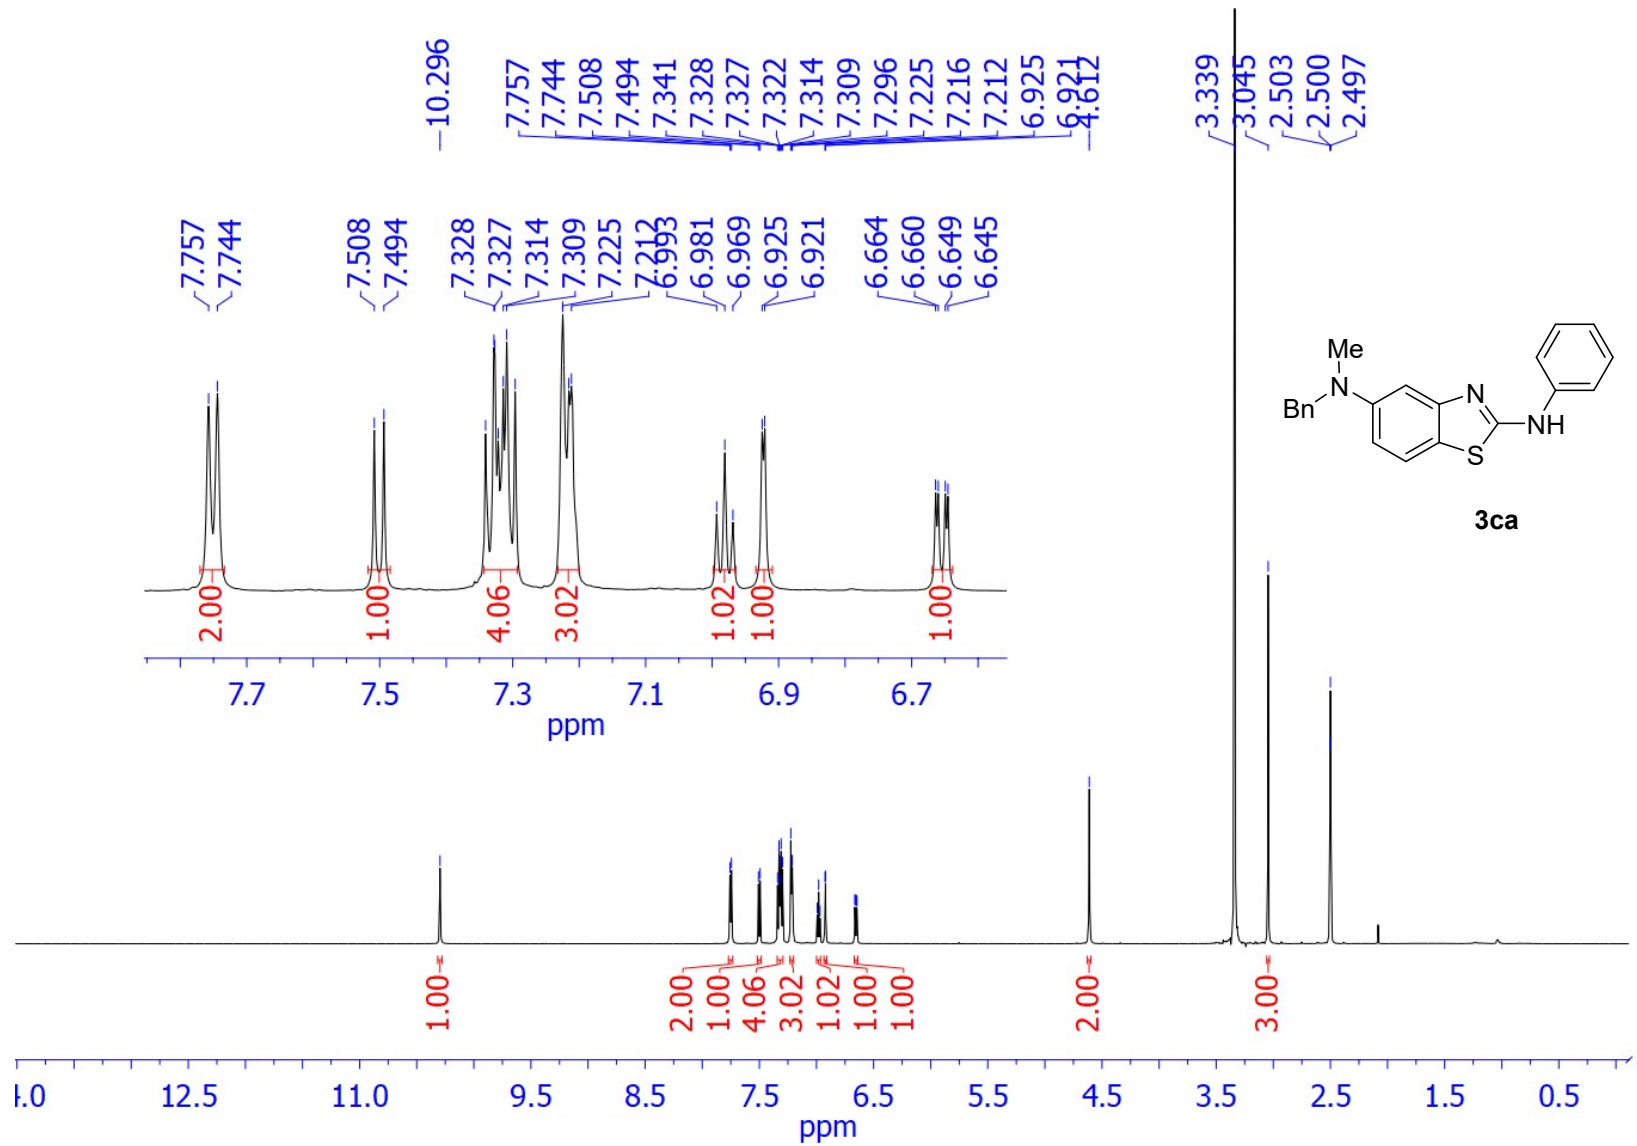

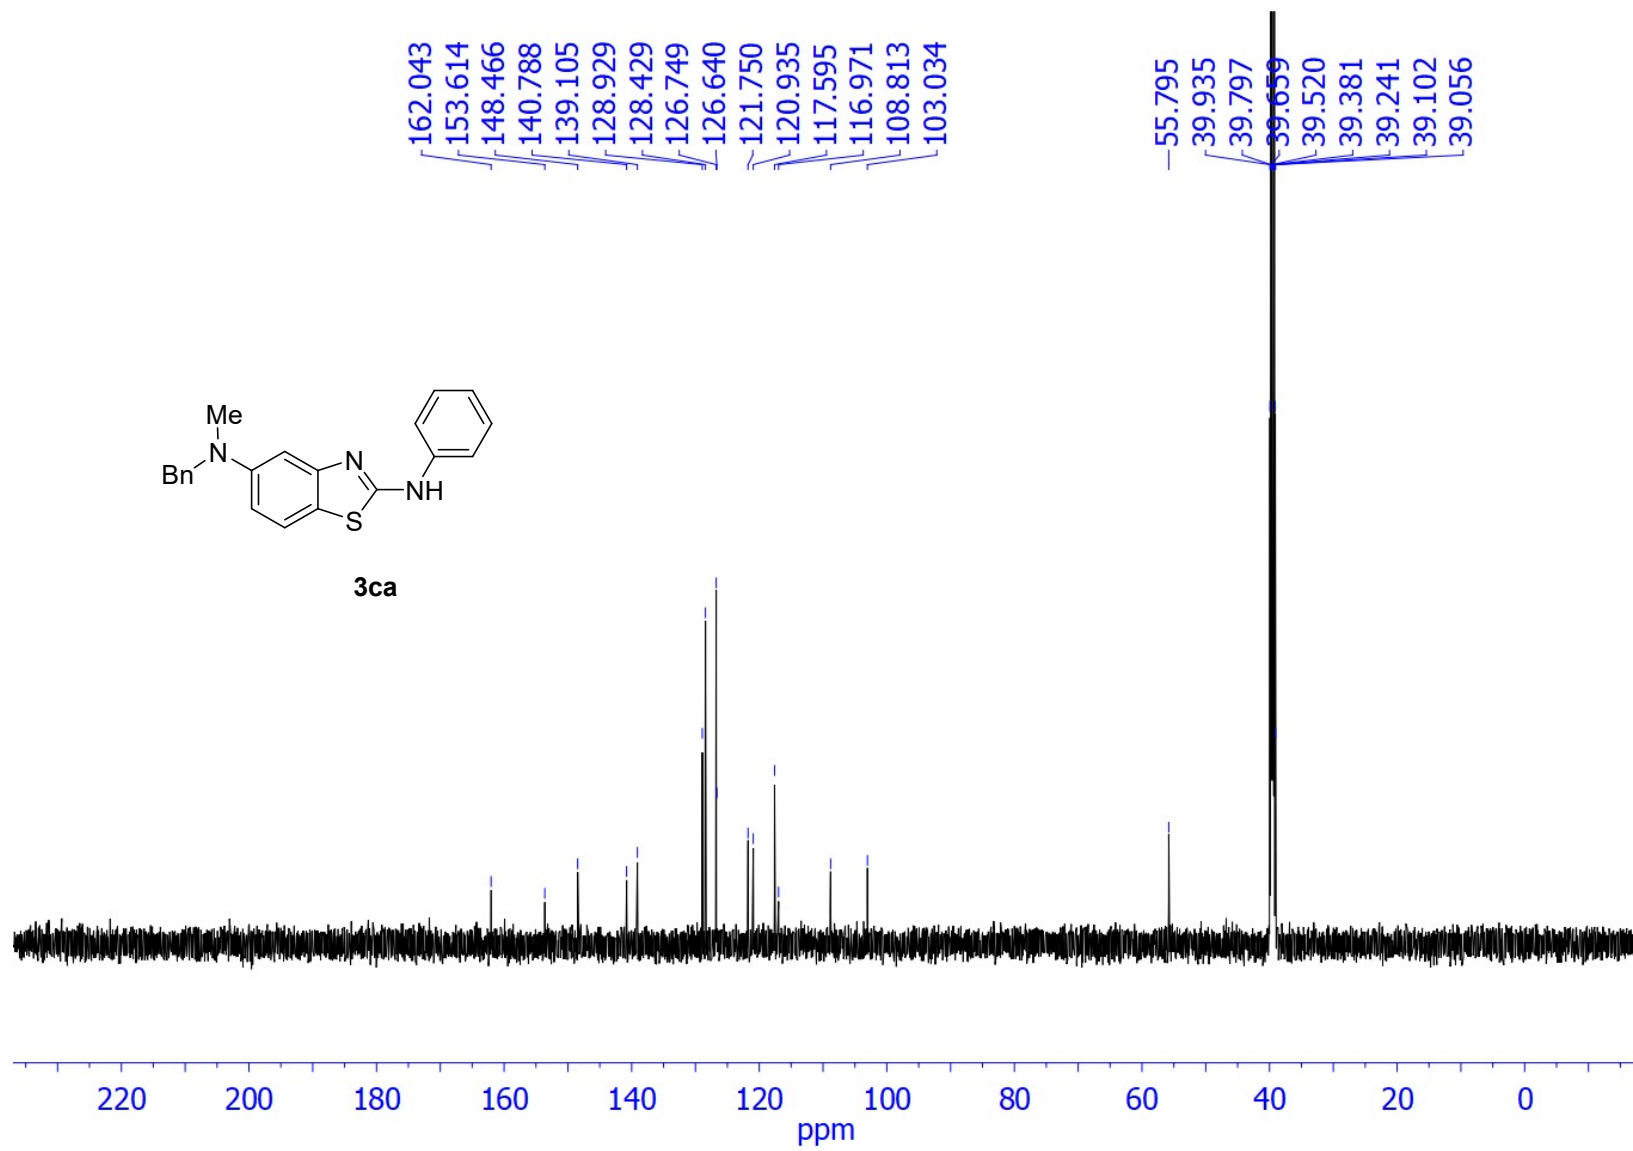

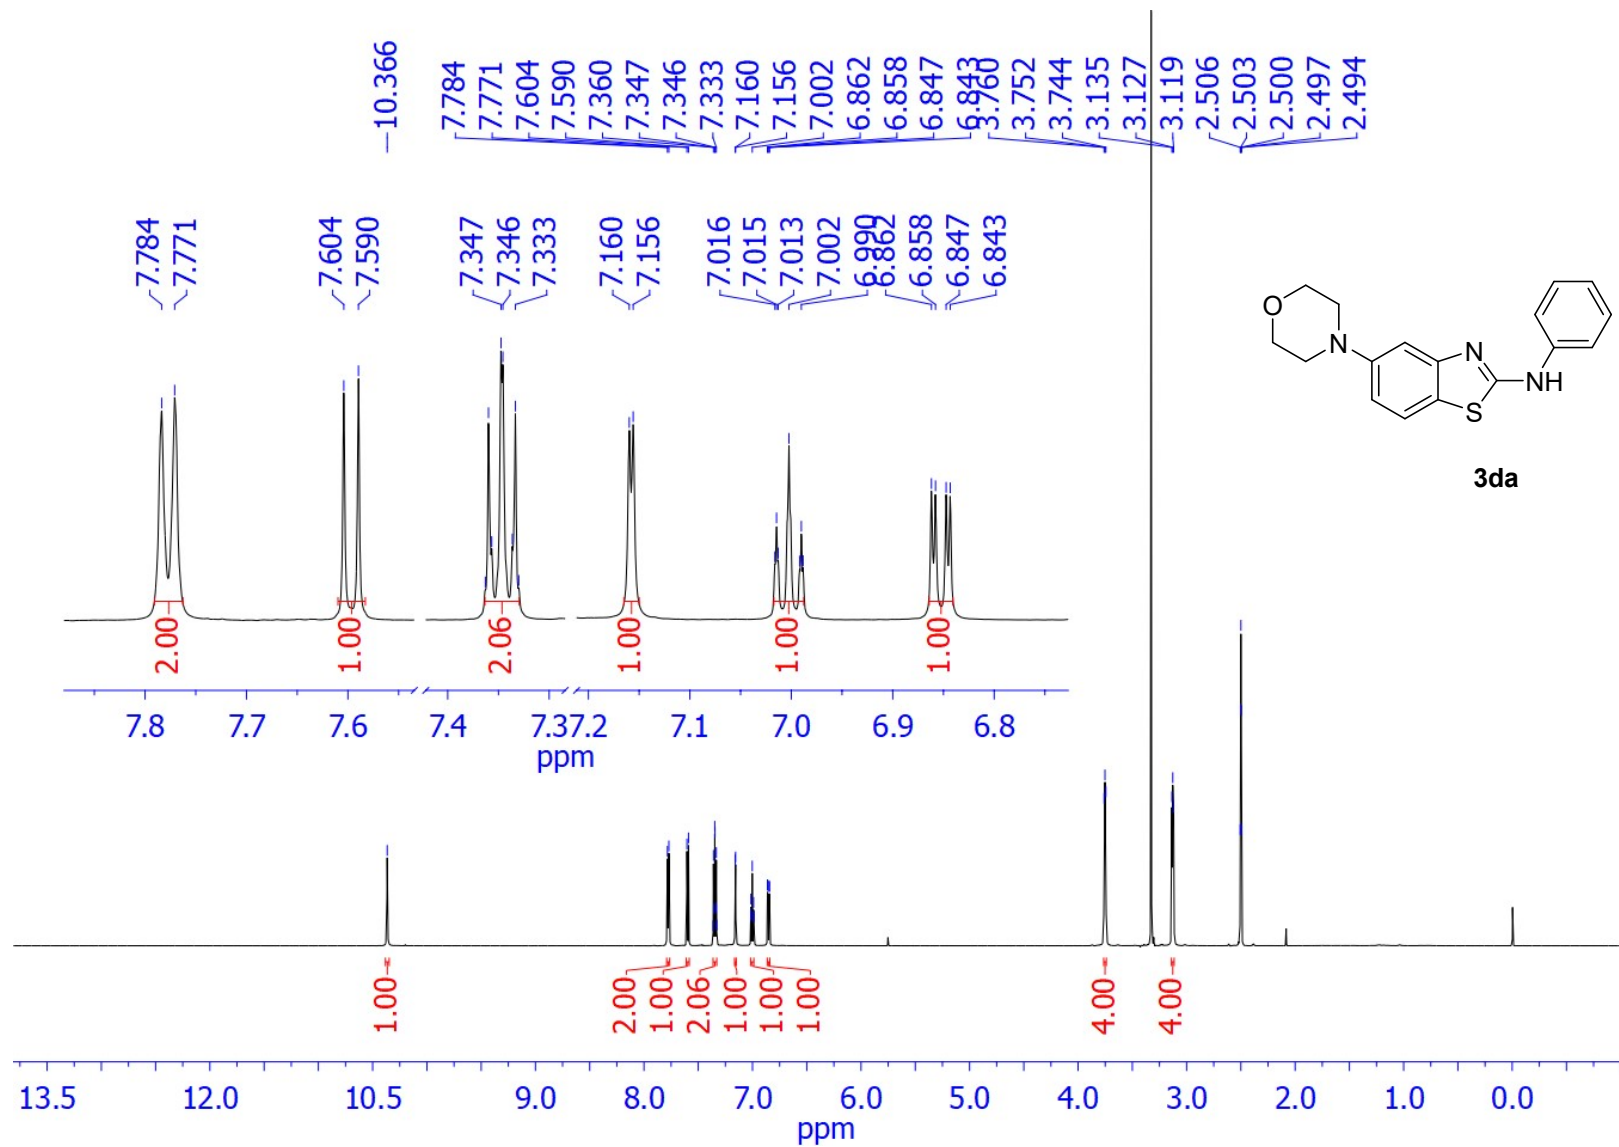

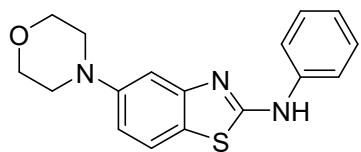

3da

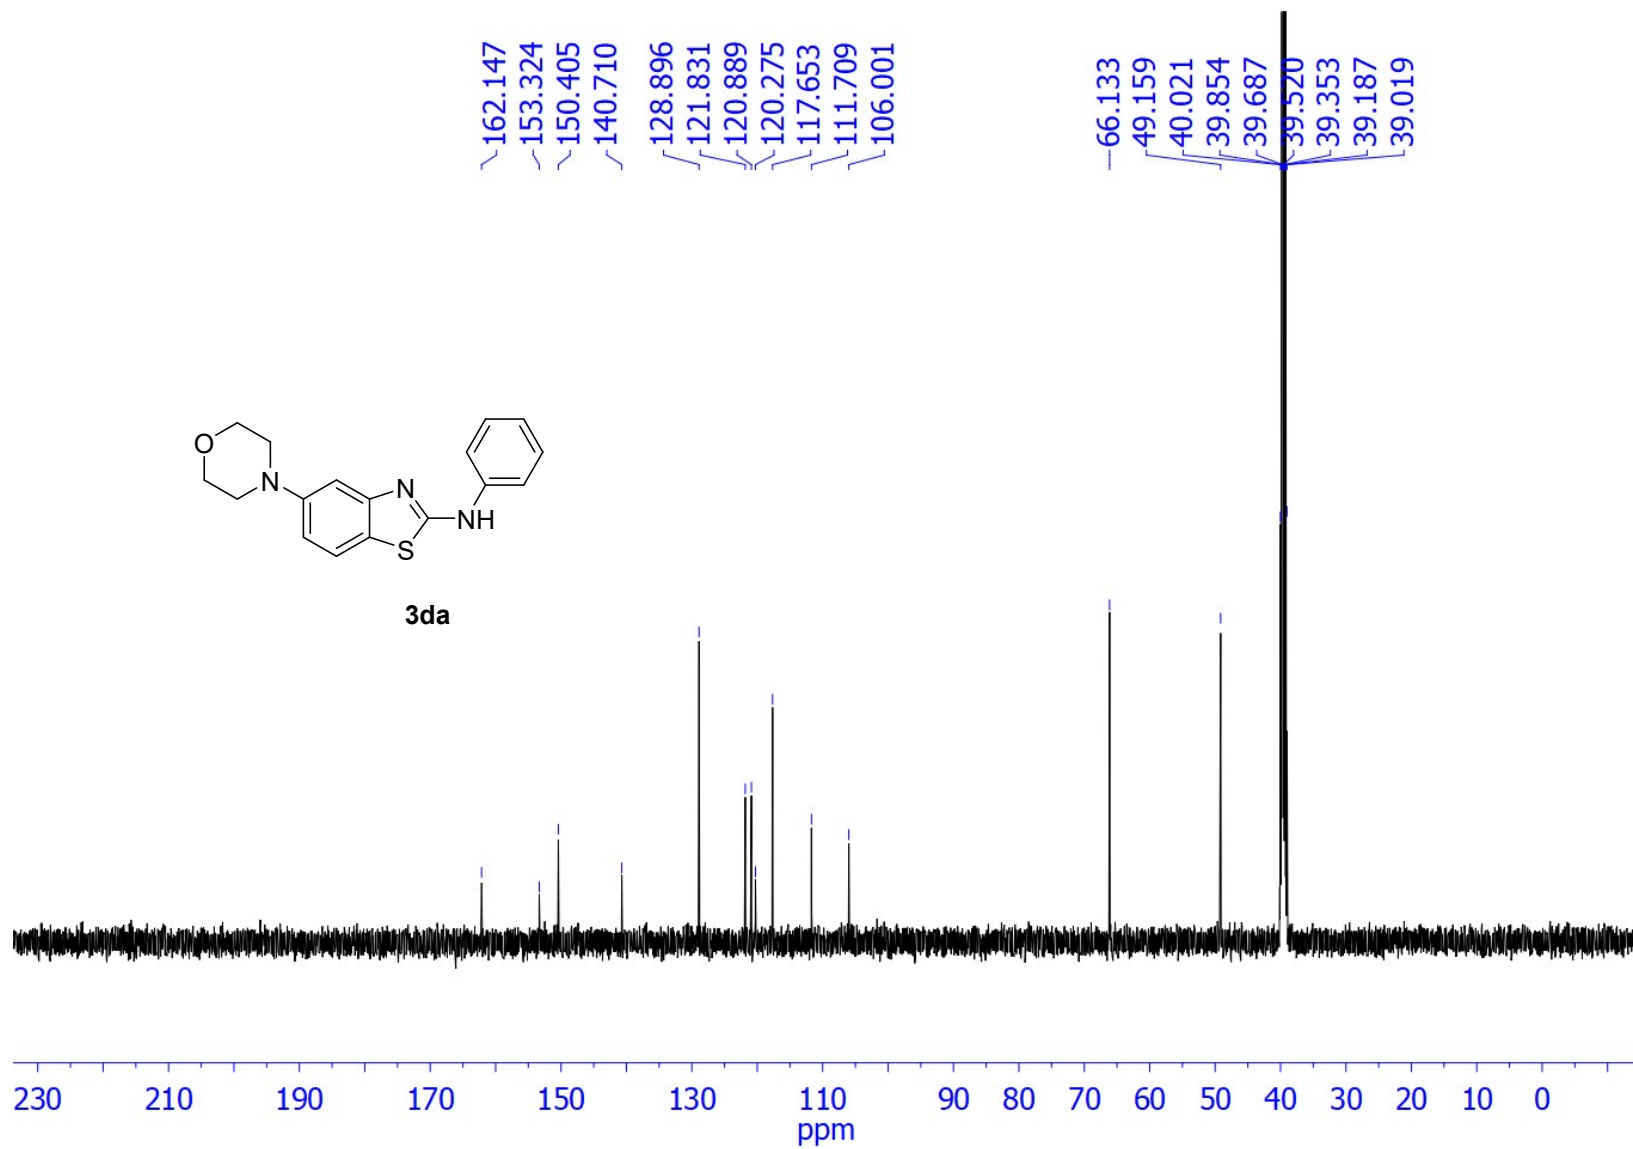



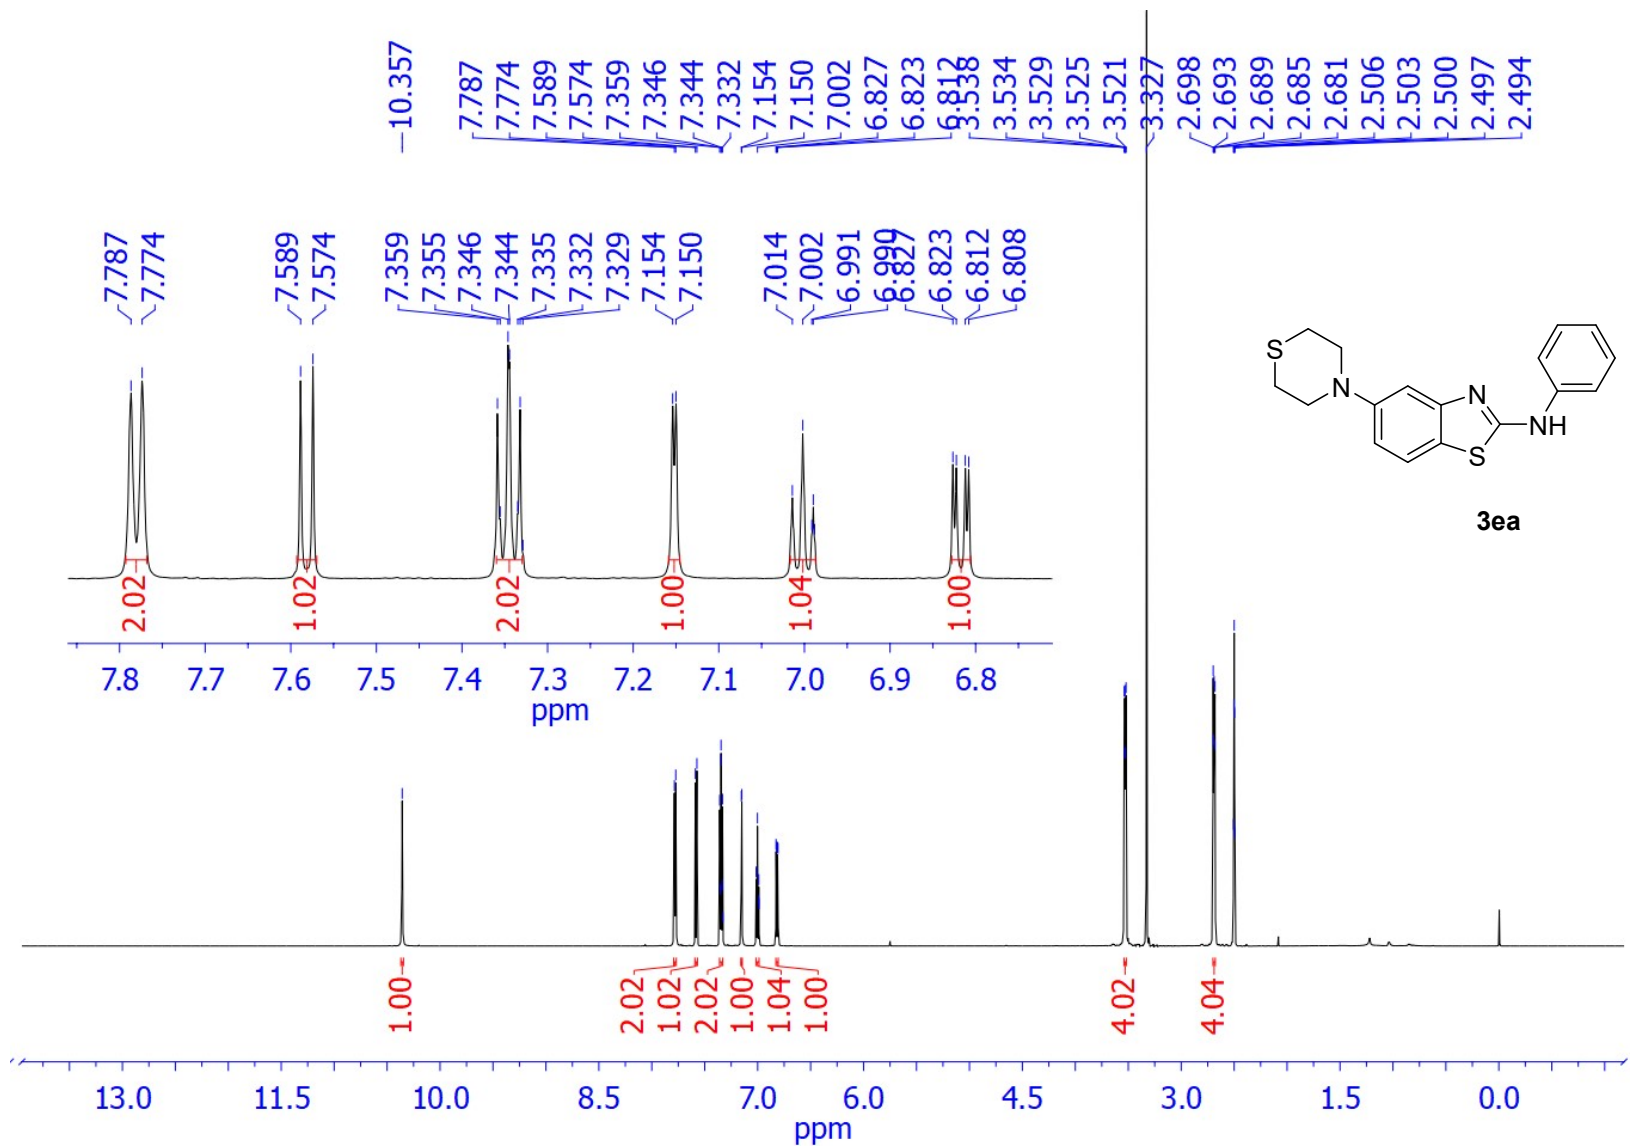

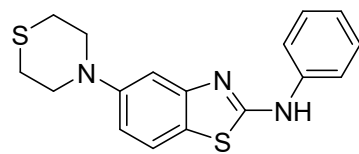

3ea

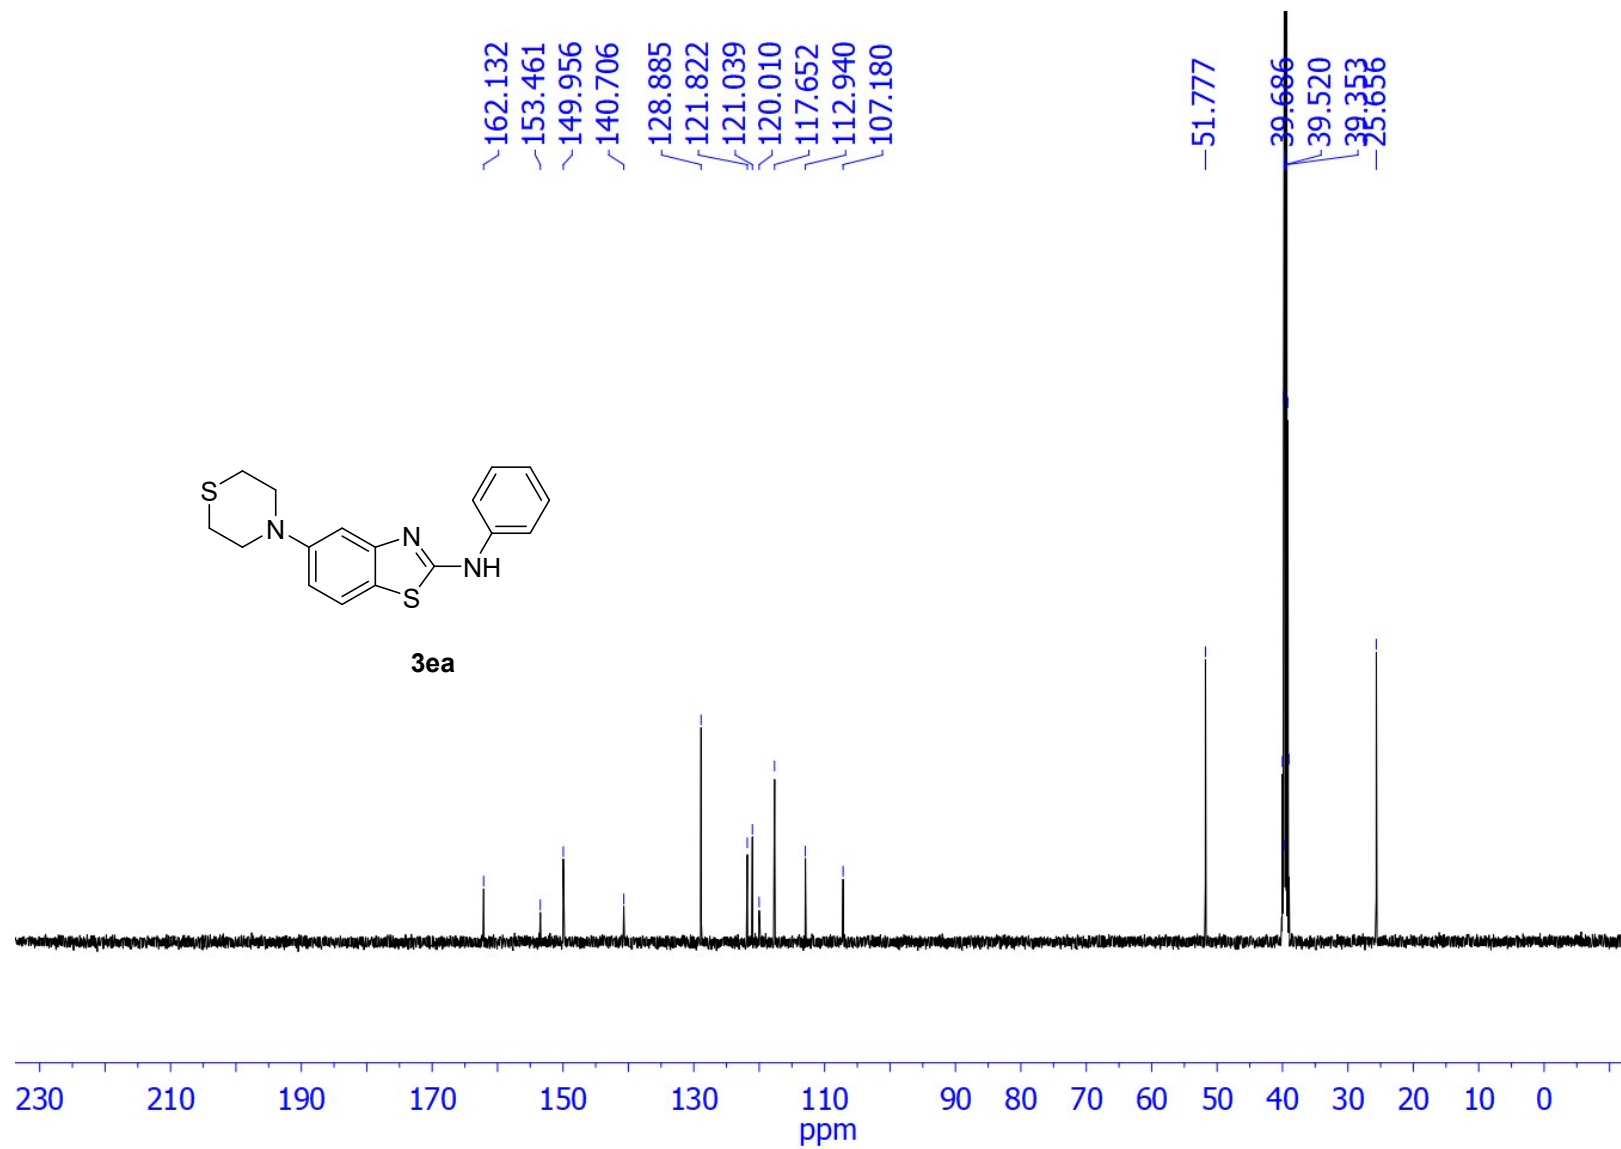

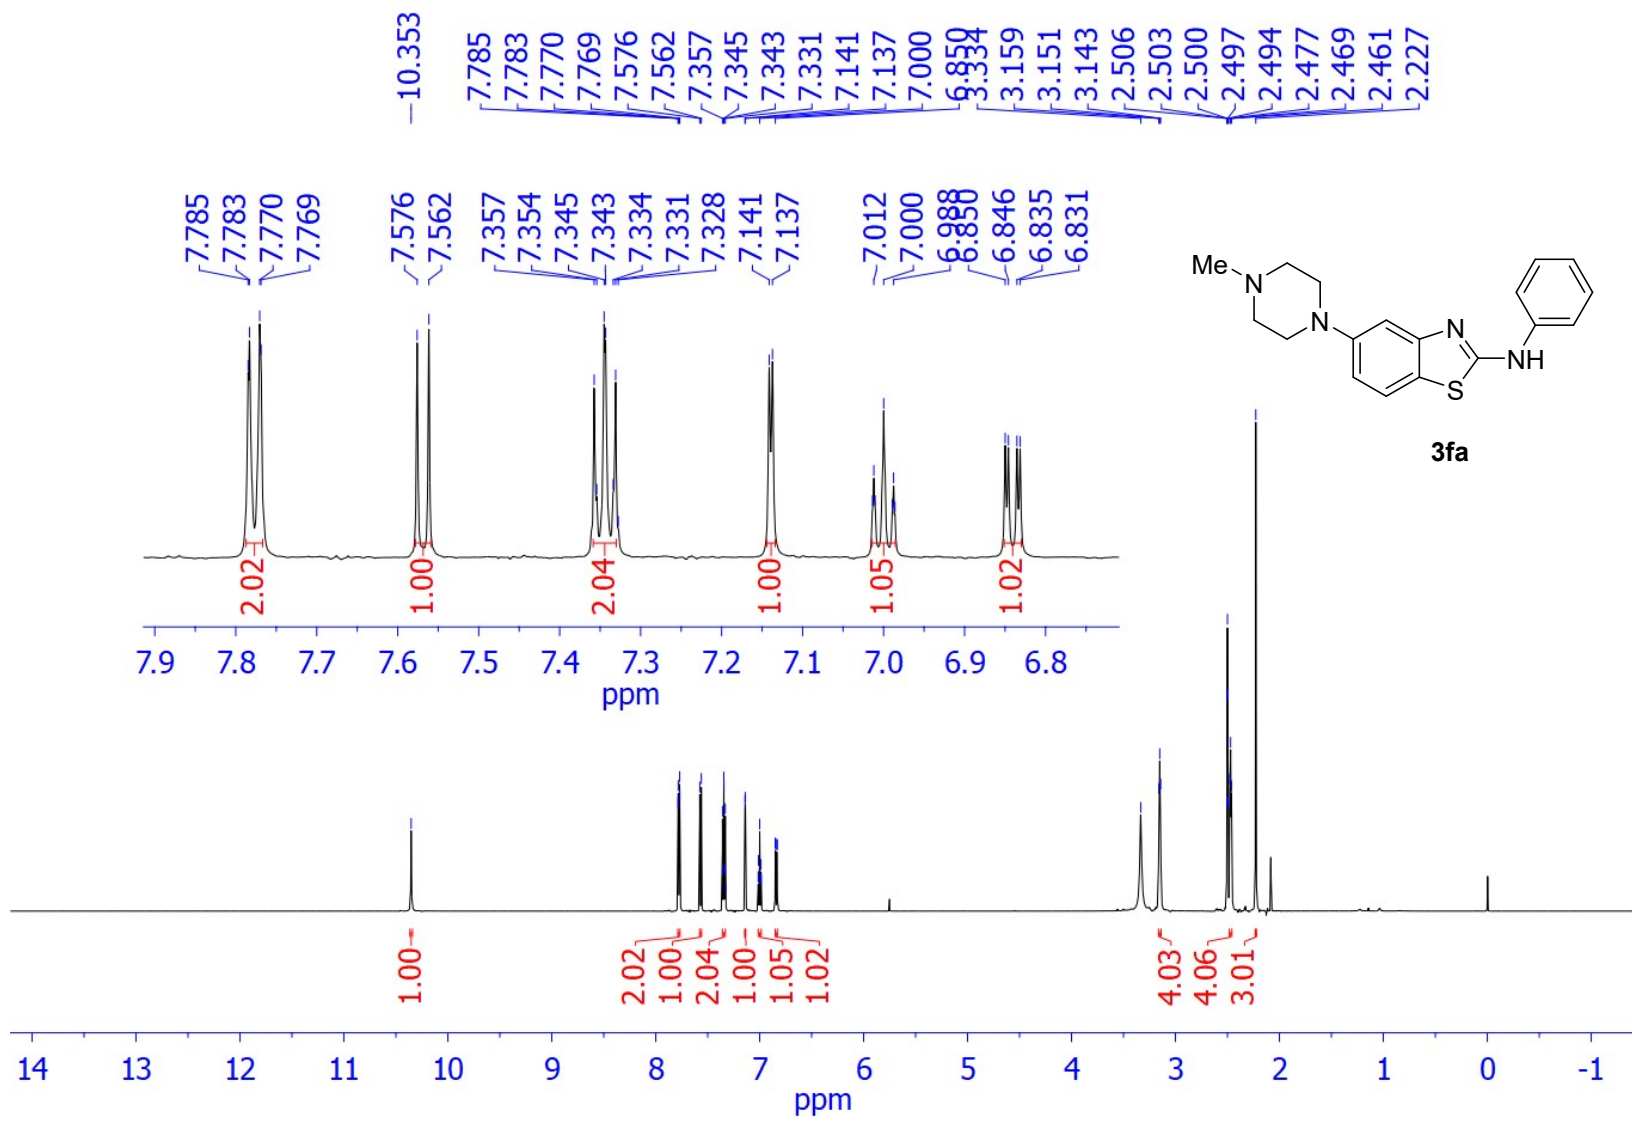

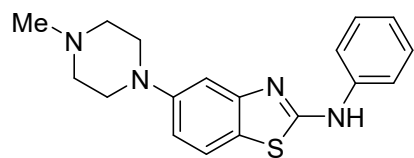

**3fa**

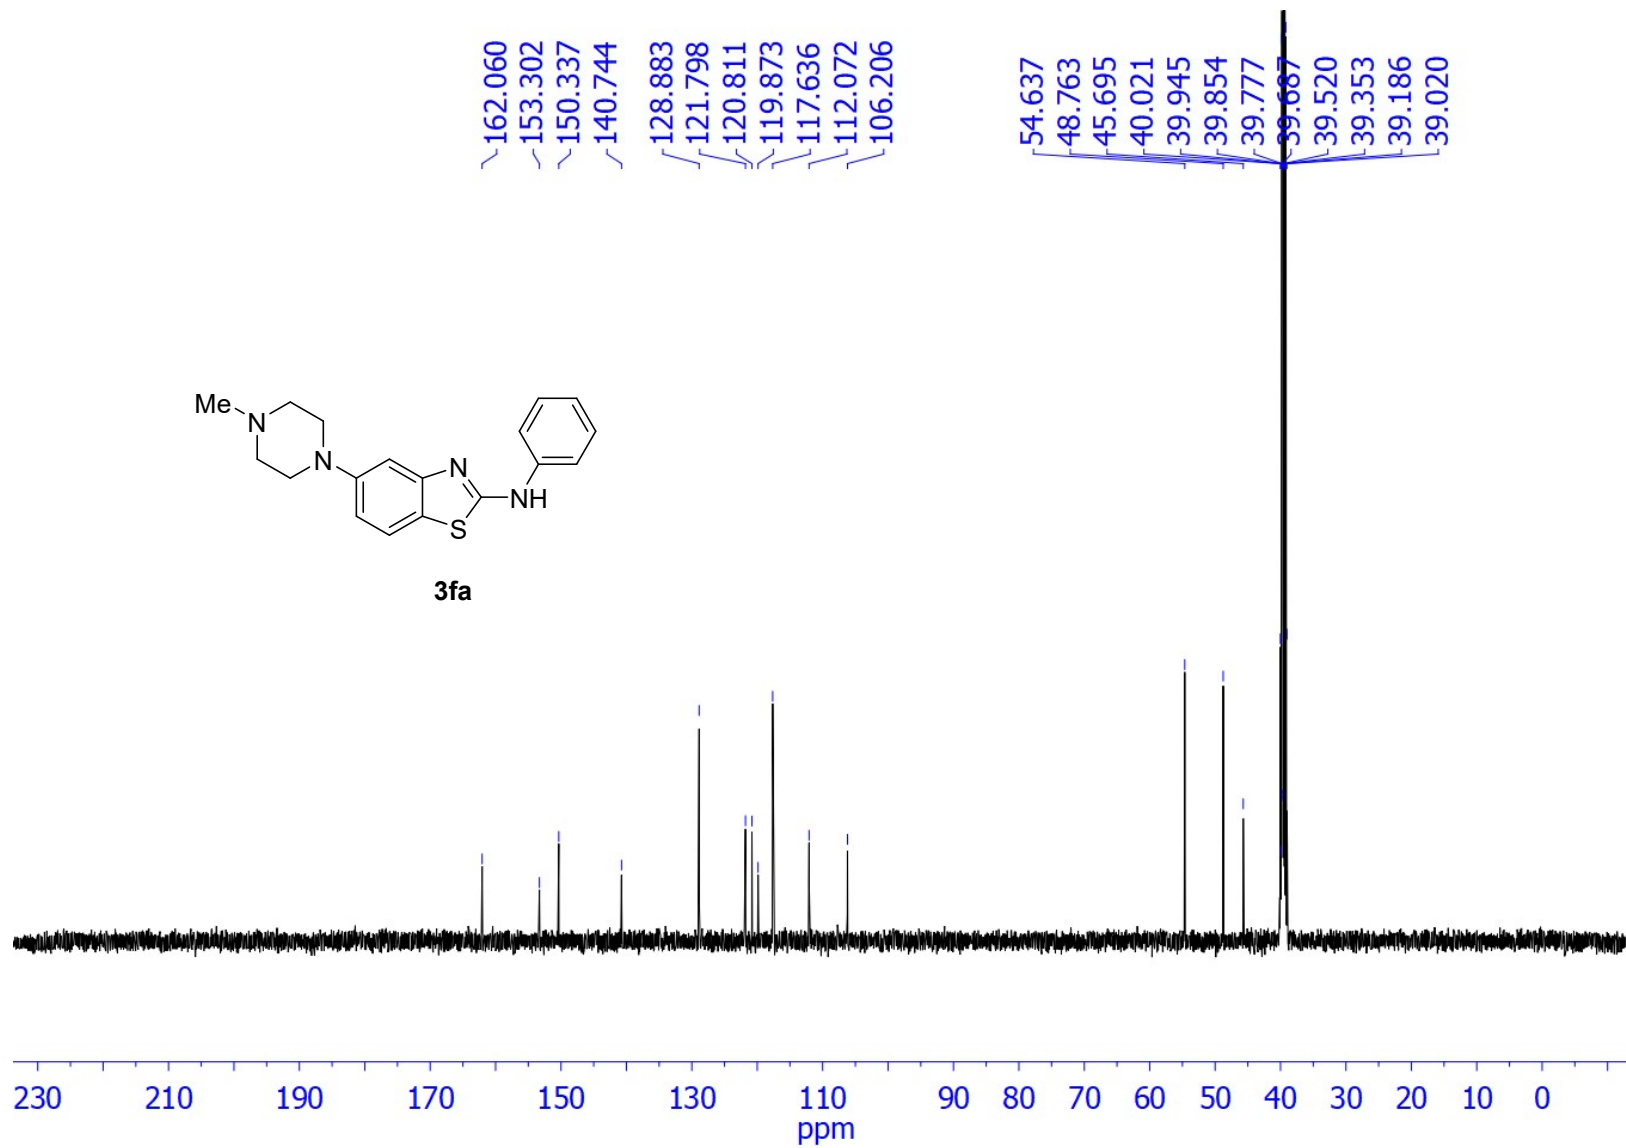

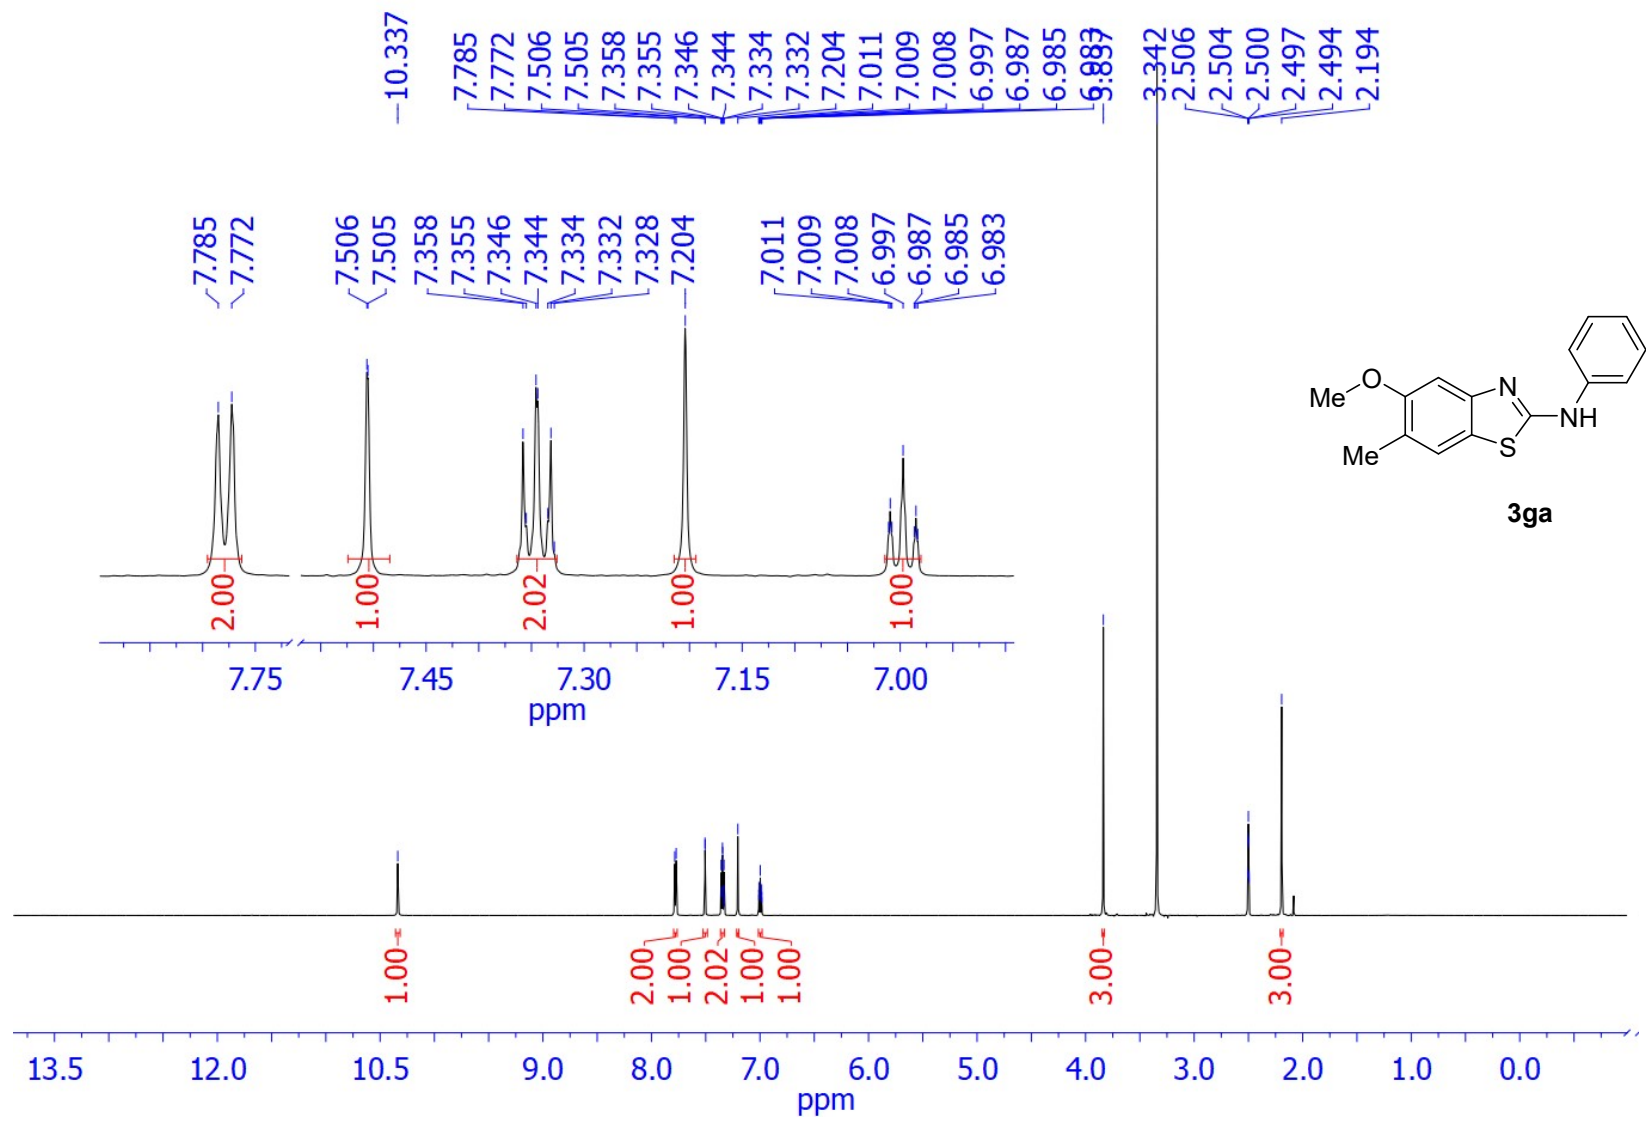

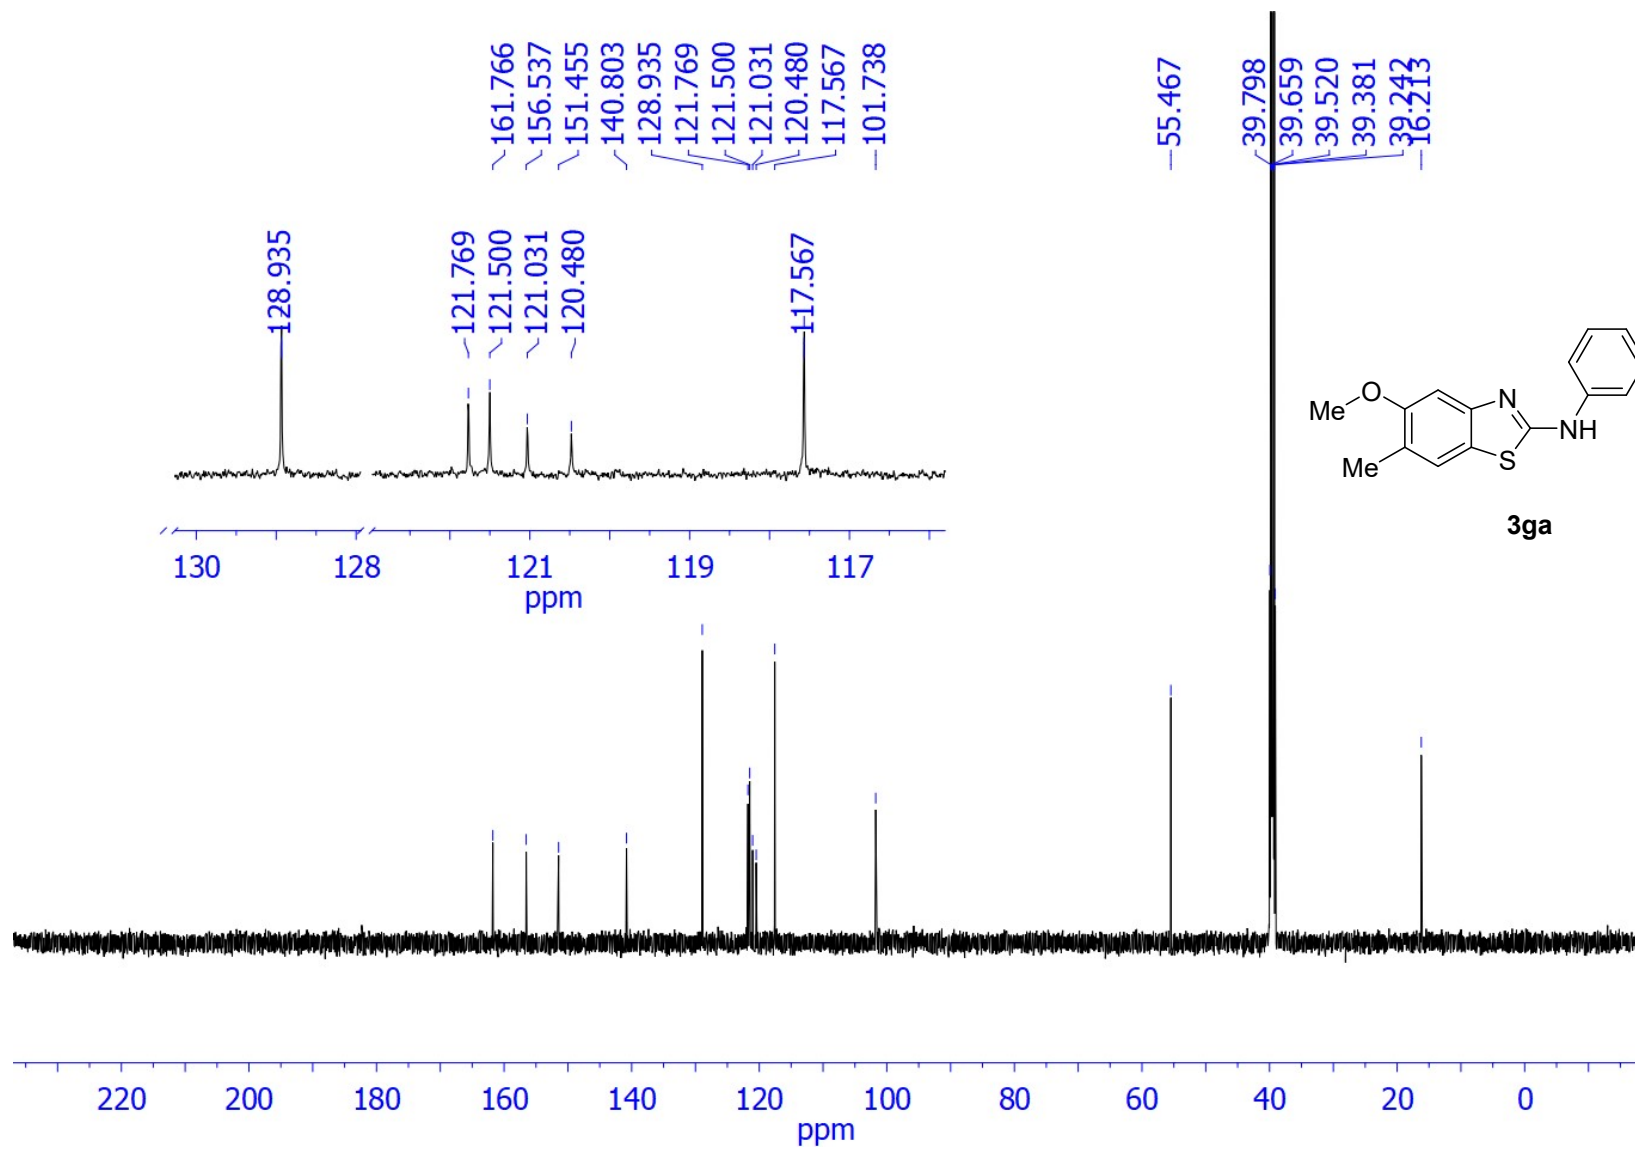

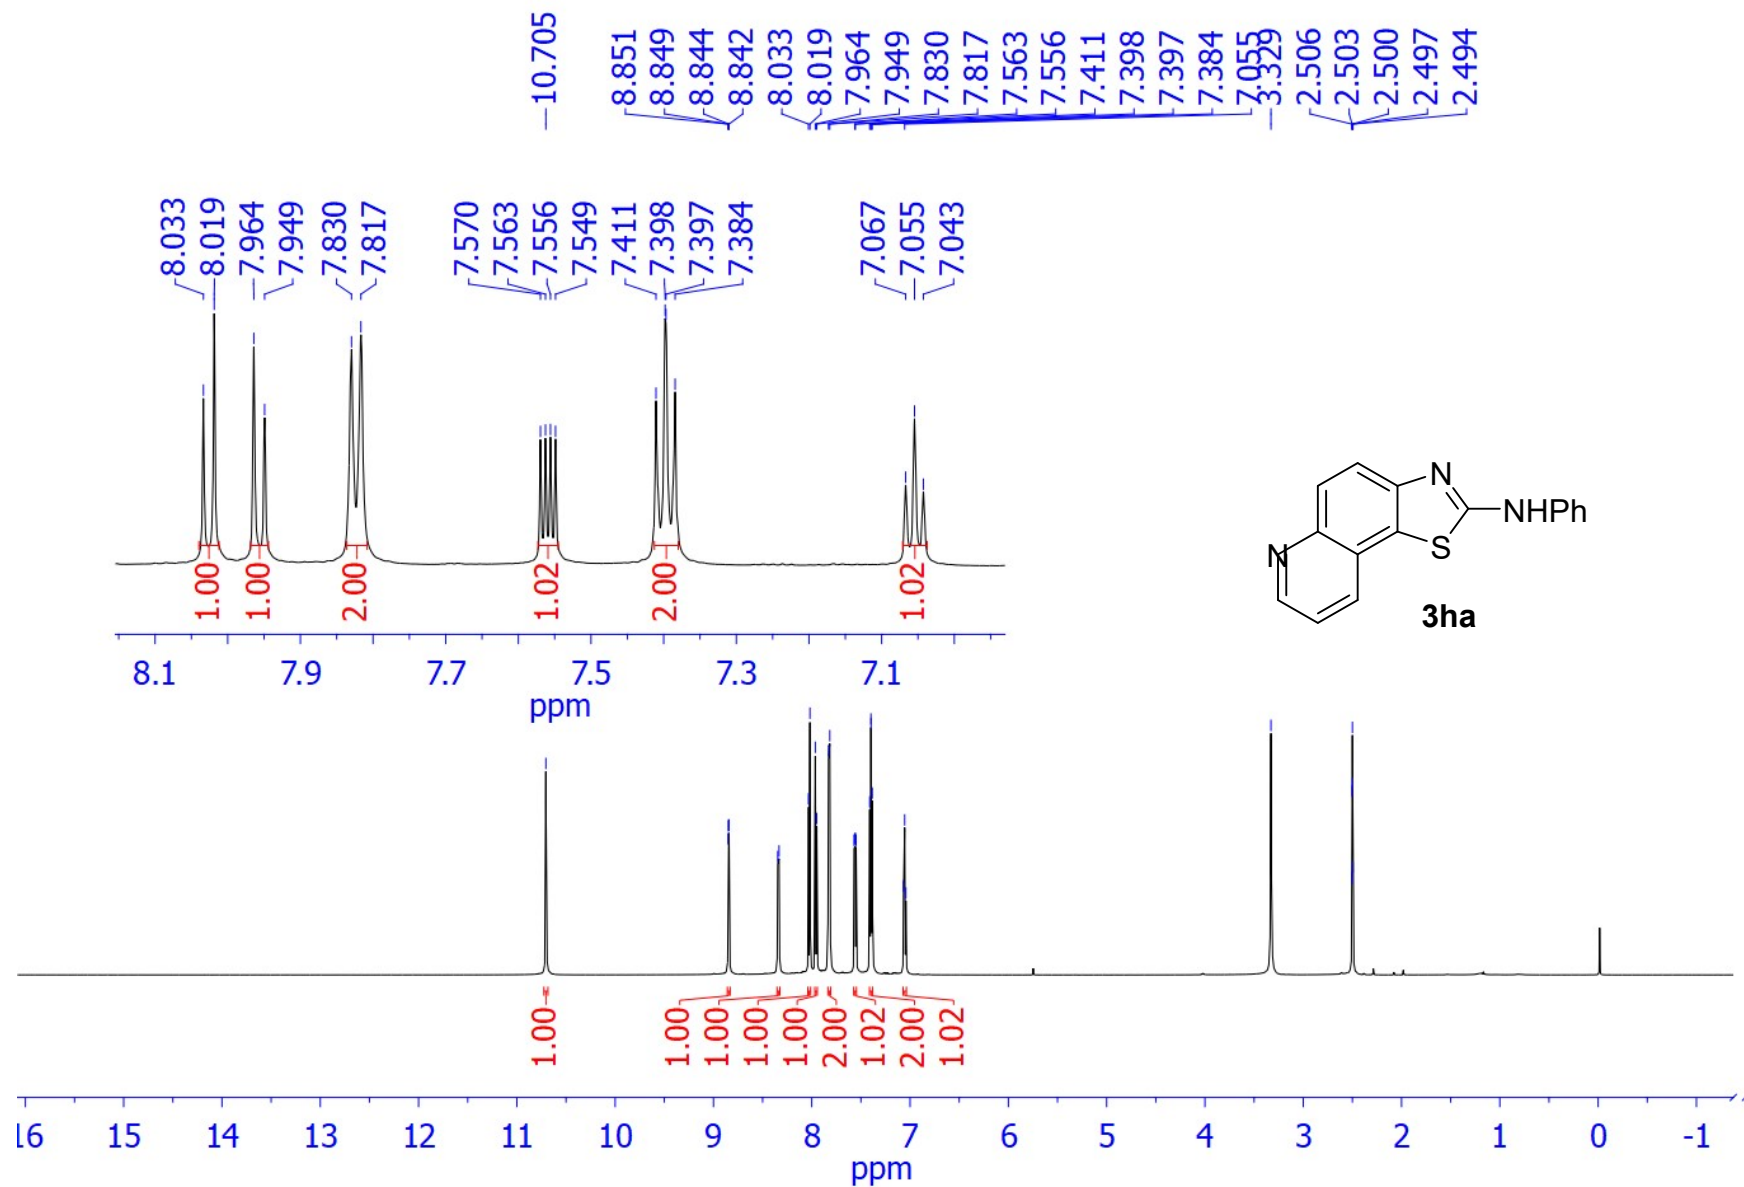

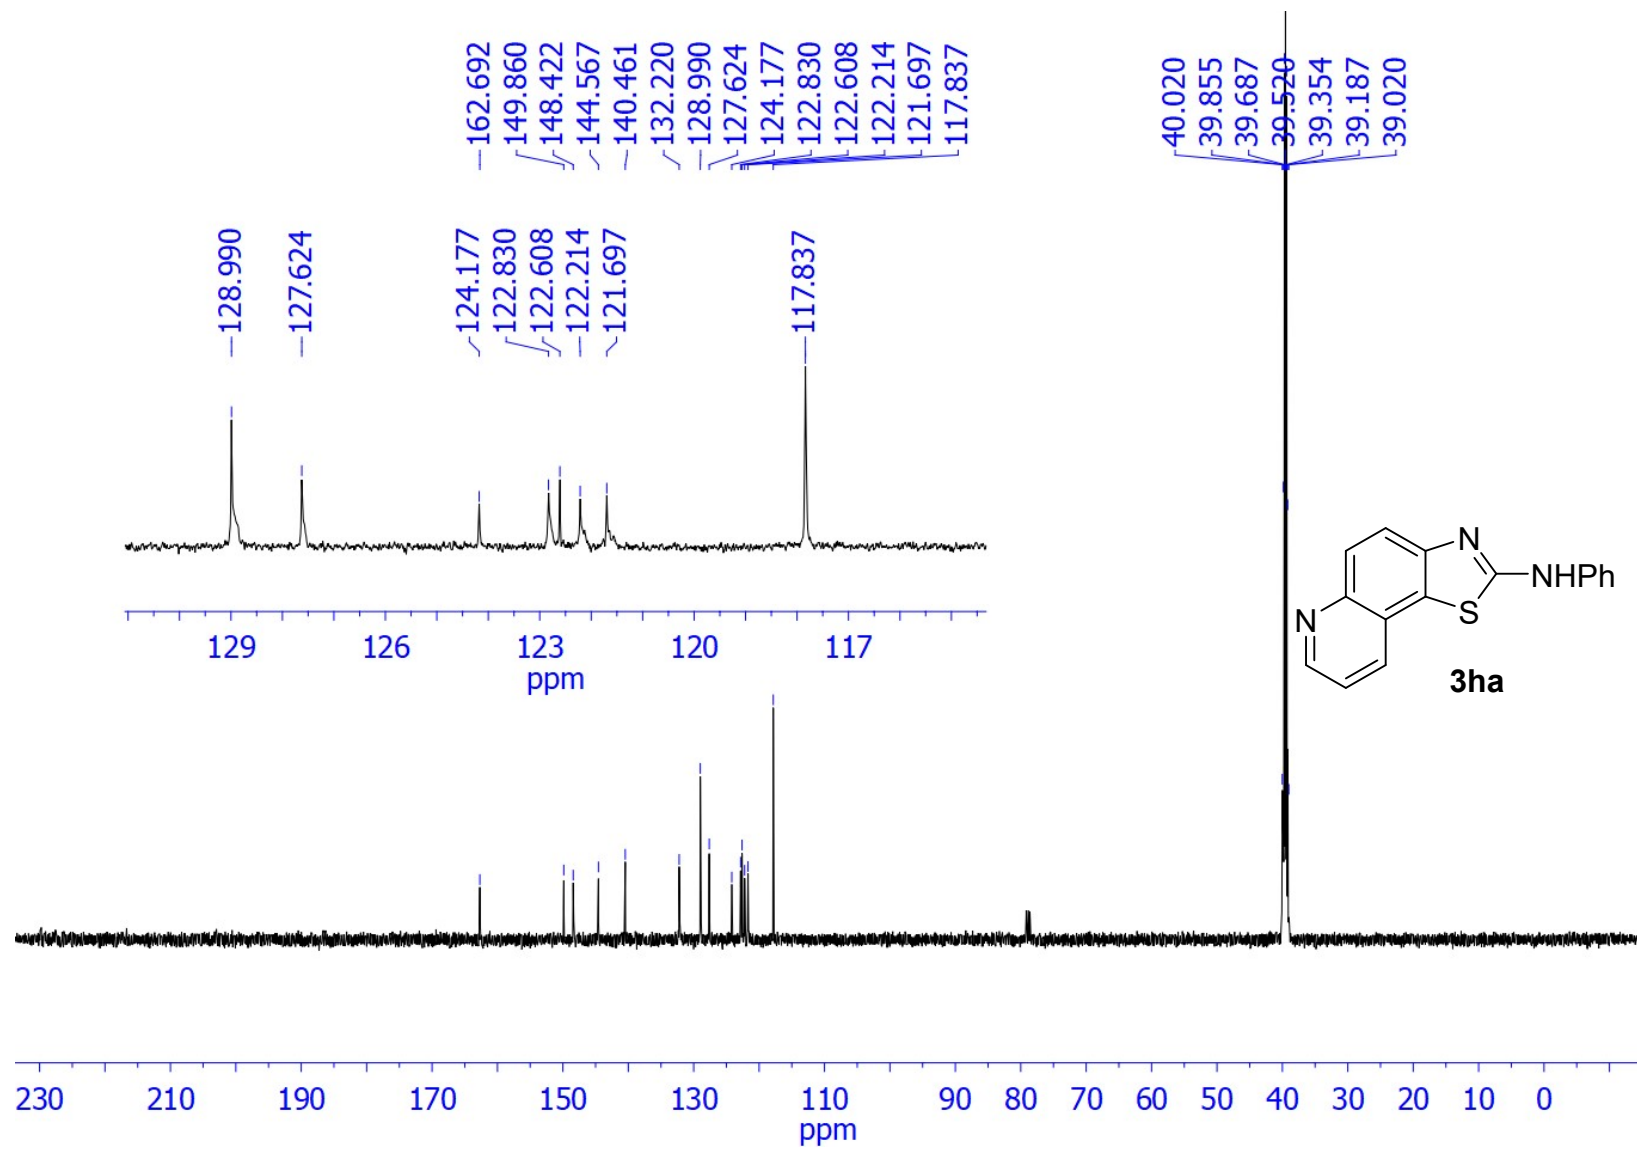

Supplement: d4ob00789a1.pdf [file d4ob00789a1.pdf]
